# Supplementary material
Source: PubMed Central journal article supplement (PMC5394868)
Supplement: 28c4a89dc3d26e34bcea4a63e896cb40_2016_143891-Disclosures_and_Contributions.pdf [file 28c4a89dc3d26e34bcea4a63e896cb40_2016_143891-Disclosures_and_Contributions.pdf]

Haematologica  
HAEMATOL/2016/143891  
Version 4

Alterations of miRNAs and miRNA-regulated mRNA expression in GC  
B cell lymphomas determined by integrative sequencing analysis

Kebria Hezaveh, Andreas Kloetgen, Stephan H. Bernhart, Kunal Das Mahapatra, Dido Lenze, Julia Richter, Andrea Haake, Anke K. Bergmann, Benedikt Brors, Birgit Burkhardt, Alexander Claviez, Hans G. Drexler, Roland Eils, Siegfried Haas, Steve Hoffmann, Dennis Karsch, Wolfram Klapper, Kortine Kleinheinz, Jan Korbel, Helene Kretzmer, Markus Kreuz, Ralf Küppers, Chris Lawerenz, Ellen Leich, Markus Loeffler, Luisa Mantovani-Loeffler, Cristina López, Alice C. McHardy, Peter Möller, Marius Rohde, Philip Rosenstiel, Andreas Rosenwald, Markus Schilhabel, Matthias Schlesner, Ingrid Scholz, Peter F. Stadler, Stephan Stilgenbauer, Séphanie Sungalee, Monika Szczepanowski, Lorenz Trümper, Marc A. Weniger, Reiner Siebert, Arndt Borkhardt, Michael Hummel, and Jessica I. Hoell

Disclosures: The project was funded by the Federal Ministry of Education and Research in Germany (BMBF) within the Program for Medical Genome Research (01KU1002A through 01KU1002J). The authors also acknowledge funding by Heinrich-Heine University Duesseldorf (Forschungskommission 17/2013), the Deutsche Forschungsgemeinschaft (DFG, HO 5456/3-1) and by the Duesseldorf School of Oncology (funded by the Comprehensive Cancer Center Duesseldorf/Deutsche Krebshilfe and the Medical Faculty HHU Duesseldorf).

Contributions: Contribution: K.H., K.M., A.H., E.L., D.L., C.Lopez, and J.R. performed experiments; A.K., S.H.B., S. Hoffmann, K.K., H.K., A.C.M., S.S., and M. Szczepanowski analyzed results; A.K.B., B.B., A.C., S. Haas, D.K., L.M.-L., M.R., A.R., and S.S. were involved in case collection; B.B., R.E., J.K., M.K., C. Lawerenz, M.L., P.R., M. Schilhabel, M. Schlesner, I.S., P.F.S., and M.A.W. were involved in data collection; H.G.D. characterized and provided cell lines; W.K., R.K., P.M., and L.T. performed histopathological review; R.S., A.B., M.H. and J.I.H. designed the research and wrote the paper.
