# Supplementary material
Source: PubMed Central journal article supplement (PMC5394868)
Supplement: 2016.143891.HEZAVEH_SUPPL.pdf [file 2016.143891.HEZAVEH_SUPPL.pdf]

# Alterations of microRNA and microRNA-regulated messenger RNA expression in germinal center B-cell lymphomas determined by integrative sequencing analysis

Kebria Hezaveh,<sup>1,\*</sup> Andreas Kloetgen,<sup>1,2,\*</sup> Stephan H Bernhart,<sup>3,4,5,\*</sup> Kunal Das Mahapatra,<sup>1</sup> Dido Lenze,<sup>6</sup> Julia Richter,<sup>7</sup> Andrea Haake,<sup>7</sup> Anke K Bergmann,<sup>7</sup> Benedikt Brors,<sup>8,9,10</sup> Birgit Burkhardt,<sup>11</sup> Alexander Claviez,<sup>12</sup> Hans G Drexler,<sup>13</sup> Roland Eils,<sup>14,15</sup> Siegfried Haas,<sup>16</sup> Steve Hoffmann,<sup>3,4</sup> Dennis Karsch,<sup>17</sup> Wolfram Klapper,<sup>18</sup> Kortine Kleinheinz,<sup>14</sup> Jan Korbel,<sup>19</sup> Helene Kretzmer,<sup>3,4</sup> Markus Kreuz,<sup>20</sup> Ralf Küppers,<sup>21</sup> Chris Lawrenz,<sup>14</sup> Ellen Leich,<sup>22</sup> Markus Loeffler,<sup>20</sup> Luisa Mantovani-Loeffler,<sup>23</sup> Cristina López,<sup>7</sup> Alice C McHardy,<sup>2,24</sup> Peter Möller,<sup>25</sup> Marius Rohde,<sup>26</sup> Philip Rosenstiel,<sup>27</sup> Andreas Rosenwald,<sup>22</sup> Markus Schilhabel,<sup>27</sup> Matthias Schlesner,<sup>14</sup> Ingrid Scholz,<sup>14</sup> Peter F Stadler,<sup>3,4,5,28,29,30</sup> Stephan Stilgenbauer,<sup>31</sup> Stéphanie Sungalee,<sup>19</sup> Monika Szczepanowski,<sup>18</sup> Lorenz Trümper,<sup>32</sup> Marc A Weniger,<sup>21</sup> Reiner Siebert,<sup>7§</sup> Arndt Borkhardt,<sup>1§</sup> Michael Hummel,<sup>6,§</sup> and Jessica I. Hoell,<sup>§,1</sup> on behalf of the ICGC MMML-Seq Project<sup>‡</sup>

<sup>1</sup>Department of Pediatric Oncology, Hematology and Clinical Immunology, Heinrich-Heine-University, Medical Faculty, Düsseldorf, Germany; <sup>2</sup>Department of Algorithmic Bioinformatics, Heinrich-Heine University, Duesseldorf, Germany; <sup>3</sup>Transcriptome Bioinformatics Group, LIFE Research Center for Civilization Diseases, University of Leipzig, Germany; <sup>4</sup>Bioinformatics Group, Department of Computer Science, University of Leipzig, Germany; <sup>5</sup>Interdisciplinary Center for Bioinformatics, University of Leipzig, Germany; <sup>6</sup>Institute of Pathology, Charité – University Medicine Berlin, Germany; <sup>7</sup>Institute of Human Genetics, University Hospital Schleswig-Holstein Campus Kiel/ Christian-Albrechts University Kiel, Germany; <sup>8</sup>Division Applied Bioinformatics, German Cancer Research Center (DKFZ), Heidelberg, Germany; <sup>9</sup>National Center for Tumor Diseases (NCT), Heidelberg, Germany; <sup>10</sup>German Cancer Consortium (DKTK), Heidelberg, Germany; <sup>11</sup>Department of Pediatric Hematology and Oncology, University Hospital Münster, Germany; <sup>12</sup>Department of Pediatrics, University Hospital Schleswig-Holstein, Campus Kiel, Germany; <sup>13</sup>Department of Human and Animal Cell Cultures, German Collection of Microorganisms and Cell Cultures, Braunschweig, Germany; <sup>14</sup>Division of Theoretical Bioinformatics (B080), German Cancer Research Center (DKFZ), Heidelberg, Germany; <sup>15</sup>Department of Bioinformatics and Functional Genomics, Institute for Pharmacy and Molecular Biotechnology and Bioquant, Heidelberg University, Germany; <sup>16</sup>Friedrich-Ebert Hospital Neumünster, Clinics for Hematology, Oncology and Nephrology, Neumünster, Germany; <sup>17</sup>Department of Internal Medicine II: Hematology and Oncology, University Medical Centre, Campus Kiel, Germany; <sup>18</sup>Hematopathology Section, University Hospital Schleswig-Holstein Campus Kiel/ Christian-Albrechts University Kiel, Germany; <sup>19</sup>EMBL Heidelberg, Genome Biology, Heidelberg, Germany; <sup>20</sup>Institute for Medical Informatics Statistics and Epidemiology, Leipzig, Germany; <sup>21</sup>Institute of Cell Biology (Cancer Research), University of Duisburg-Essen, Essen, Germany; <sup>22</sup>Institute of Pathology, University of Würzburg, and Comprehensive Cancer Center Mainfranken, Würzburg, Germany; <sup>23</sup>Hospital of Internal Medicine II, Hematology and Oncology, St-Georg Hospital Leipzig, Germany; <sup>24</sup>Computational Biology of Infection Research, Helmholtz Center for Infection Research, Braunschweig, Germany; <sup>25</sup>Institute of Pathology, Medical Faculty of the Ulm University, Germany; <sup>26</sup>Department of Pediatric Hematology and Oncology University Hospital Giessen, Germany; <sup>27</sup>Institute of Clinical Molecular Biology, University Hospital Schleswig-Holstein Campus Kiel/ Christian-Albrechts University Kiel, Germany; <sup>28</sup>RNomics Group, Fraunhofer Institute for Cell Therapy and Immunology IZI, Leipzig, Germany; <sup>29</sup>Max-Planck-Institute for Mathematics in Sciences, Leipzig, Germany; <sup>30</sup>Santa Fe Institute, NM, USA; <sup>31</sup>Department of Internal Medicine III, University of Ulm, Germany; and <sup>32</sup>Department of Hematology and Oncology, Georg-August-University of Göttingen, Germany;

\*These authors contributed equally to this work.

‡A full list of members of the ICGC MMML-Seq Project and their affiliations appears in the Online Supplementary Information.

©2016 Ferrata Storti Foundation. This is an open-access paper. doi:10.3324/haematol.2016.143891

Received: February 4, 2016.

Accepted: July 1, 2016.

Pre-published: July 6, 2016.

Correspondence: jessica.hoell@med.uni-duesseldorf.de

# Supplementary Information

## Full list of members of the ICGC MMML-Seq Project

*Coordination (C1):* Gesine Richter<sup>1</sup>, Reiner Siebert<sup>1</sup>, Susanne Wagner<sup>1</sup>, Andrea Haake<sup>1</sup>, Julia Richter<sup>1</sup>

*Data Center (C2):* Roland Eils<sup>2,3</sup>, Chris Lawerenz<sup>2</sup>, Sylwester Radomski<sup>2</sup>, Ingrid Scholz<sup>2</sup>

*Clinical Centers (WP1):* Christoph Borst<sup>4</sup>, Birgit Burkhardt<sup>5</sup>, Alexander Claviez<sup>6</sup>, Martin Dreyling<sup>7</sup>, Sonja Eberth<sup>8</sup>, Hermann Einsele<sup>9</sup>, Norbert Frickhofen<sup>10</sup>, Siegfried Haas<sup>4</sup>, Martin-Leo Hansmann<sup>11</sup>, Dennis Karsch<sup>12</sup>, Michael Kneba<sup>12</sup>, Jasmin Lisfeld<sup>13</sup>, Luisa Mantovani-Löffler<sup>14</sup>, Marius Rohde<sup>13</sup>, Christina Stadler<sup>8</sup>, Peter Staib<sup>15</sup>, Stephan Stilgenbauer<sup>16</sup>, German Ott<sup>17</sup>, Lorenz Trümper<sup>8</sup>, Thorsten Zenz<sup>18</sup>

*Normal Cells (WPN):* Martin-Leo Hansmann<sup>11</sup>, Dieter Kube<sup>8</sup>, Ralf Küppers<sup>19</sup>, Marc Weniger<sup>19</sup>

*Pathology and Analyte Preparation (WP2-3):* Siegfried Haas<sup>4</sup>, Michael Hummel<sup>20</sup>, Wolfram Klapper<sup>21</sup>, Ulrike Kostezka<sup>22</sup>, Dido Lenze<sup>20</sup>, Peter Möller<sup>23</sup>, Andreas Rosenwald<sup>24</sup>, Monika Szczepanowski<sup>21</sup>

*Sequencing and genomics (WP4-7):* Ole Ammerpohl<sup>1</sup>, Sietse Aukema<sup>1</sup>, Vera Binder<sup>25</sup>, Arndt Borkhardt<sup>25</sup>, Andrea Haake<sup>1</sup>, Kebria Hezaveh<sup>25</sup>, Jessica I. Hoell<sup>25</sup>, Ellen Leich<sup>24</sup>, Peter Lichter<sup>2</sup>, Cristina López<sup>1</sup>, Inga Nagel<sup>1</sup>, Jordan Pischimariov<sup>24</sup>, Bernhard Radlwimmer<sup>2</sup>, Julia Richter<sup>1</sup>, Philip Rosenstiel<sup>26</sup>, Andreas Rosenwald<sup>24</sup>, Markus Schilhabel<sup>26</sup>, Stefan Schreiber<sup>27</sup>, Inga Vater<sup>1</sup>, Rabea Wagner<sup>1</sup>, Reiner Siebert<sup>1</sup>

*Bioinformatics (WP8-9):* Stephan H. Bernhart<sup>28,29,30</sup>, Hans Binder<sup>29</sup>, Benedikt Brors<sup>31,32,33</sup>, Gero Doose<sup>28,29,30</sup>, Jürgen Eils<sup>2</sup>, Roland Eils<sup>2,3</sup>, Steve Hoffmann<sup>28,29,30</sup>, Lydia Hopp<sup>29</sup>, Helene Kretzmer<sup>28,29,30</sup>, Markus Kreuz<sup>34</sup>, Jan Korbel<sup>35</sup>, David Langenberger<sup>28,29,30</sup>, Markus Loeffler<sup>34</sup>, Maciej Rosolowski<sup>34</sup>, Matthias Schlesner<sup>2</sup>, Peter F. Stadler<sup>28,29,30,36,37,38</sup>, Stéphanie Sungalee<sup>35</sup>

---

<sup>1</sup> Institute of Human Genetics, University Hospital Schleswig-Holstein Campus Kiel/ Christian-Albrechts University Kiel, Kiel, Germany;

<sup>2</sup> Division of Theoretical Bioinformatics (B080), German Cancer Research Center (DKFZ), Heidelberg, Germany;

<sup>3</sup> Department of Bioinformatics and Functional Genomics, Institute for Pharmacy and Molecular Biotechnology and Bioquant, Heidelberg University, Heidelberg, Germany;

<sup>4</sup> Friedrich-Ebert Hospital Neumünster, Clinics for Hematology, Oncology and Nephrology, Neumünster, Germany;

<sup>5</sup> Department of Pediatric Hematology and Oncology, University Hospital Münster, Münster, Germany;

<sup>6</sup> Department of Pediatrics, University Hospital Schleswig-Holstein, Campus Kiel, Germany;

<sup>7</sup> Department of Medicine III - Campus Grosshadern, University Hospital Munich, Munich, Germany;

<sup>8</sup> Department of Hematology and Oncology, Georg-August-University of Göttingen, Göttingen, Germany;

<sup>9</sup> University Hospital Würzburg, Department of Medicine and Poliklinik II, University of Würzburg, Würzburg, Germany;

<sup>10</sup> Department of Medicine III, Hematology and Oncology, Dr. Horst-Schmidt-Kliniken of Wiesbaden, Wiesbaden, Germany;

<sup>11</sup> Senckenberg Institute of Pathology, University of Frankfurt Medical School, Frankfurt am Main, Germany;

<sup>12</sup> Department of Internal Medicine II: Hematology and Oncology, University Medical Centre, Campus Kiel, Kiel, Germany;

<sup>13</sup> Department of Pediatric Hematology and Oncology University Hospital Giessen, Giessen, Germany;

<sup>14</sup> Hospital of Internal Medicine II, Hematology and Oncology, St-Georg Hospital Leipzig, Leipzig, Germany;

<sup>15</sup> University Hospital Aachen, St.-Antonius Hospital, Department of Oncology, Hematology and stem cell transplantation, University of Aachen, Aachen, Germany;

<sup>16</sup> Department of Internal Medicine III, University of Ulm, Ulm, Germany;

<sup>17</sup> Robert-Bosch Hospital Stuttgart, Department of Pathology, Stuttgart, Germany;

<sup>18</sup> Department of Medicine V, University of Heidelberg, Heidelberg, Germany;

- 
- <sup>19</sup> Institute of Cell Biology (Cancer Research), University of Duisburg-Essen, Essen, Germany;
- <sup>20</sup> Institute of Pathology, Charité – University Medicine Berlin, Berlin, Germany;
- <sup>21</sup> Hematopathology Section, University Hospital Schleswig-Holstein Campus Kiel/ Christian-Albrechts University Kiel, Kiel, Germany;
- <sup>22</sup> Comprehensive Cancer Center Ulm (CCCU), University Hospital Ulm, Ulm, Germany;
- <sup>23</sup> Institute of Pathology, Medical Faculty of the Ulm University, Ulm, Germany;
- <sup>24</sup> Institute of Pathology, University of Würzburg, Würzburg, Germany;
- <sup>25</sup> Department of Pediatric Oncology, Hematology and Clinical Immunology, Heinrich-Heine-University, Medical Faculty, Düsseldorf, Germany;
- <sup>26</sup> Institute of Clinical Molecular Biology, University Hospital Schleswig-Holstein Campus Kiel/ Christian-Albrechts University Kiel, Kiel, Germany;
- <sup>27</sup> Department of General Internal Medicine, University Hospital Schleswig-Holstein Campus Kiel/ Christian-Albrechts University Kiel, Kiel, Germany;
- <sup>28</sup> Transcriptome Bioinformatics, LIFE Research Center for Civilization Diseases, University of Leipzig, Leipzig, Germany;
- <sup>29</sup> Interdisciplinary Center for Bioinformatics, University of Leipzig, Leipzig, Germany;
- <sup>30</sup> Bioinformatics Group, Department of Computer Science, University of Leipzig, Leipzig, Germany;
- <sup>31</sup> Division Applied Bioinformatics, German Cancer Research Center (DKFZ), Heidelberg, Germany;
- <sup>32</sup> National Center for Tumor Diseases (NCT), Heidelberg, Germany;
- <sup>33</sup> German Cancer Consortium (DKTK), Heidelberg, Germany;
- <sup>34</sup> Institute for Medical Informatics Statistics and Epidemiology, Leipzig, Germany;
- <sup>35</sup> EMBL Heidelberg, Genome Biology, Heidelberg, Germany;
- <sup>36</sup> RNomics Group, Fraunhofer Institute for Cell Therapy and Immunology IZI, Leipzig, Germany;
- <sup>37</sup> Santa Fe Institute, Santa Fe, New Mexico, United States of America;
- <sup>38</sup> Max-Planck-Institute for Mathematics in Sciences, Leipzig, Germany;

## Supplementary Materials and Methods

### Cell culture

Cell lines (Namalwa, Raji, SU-DHL-4, and SU-DHL-6) were characterized and provided by Hans G. Drexler (DSMZ, Braunschweig, Germany). They were cultured with 5% CO<sub>2</sub> in RPMI 1640 (Life Technologies) supplemented with 10% FBS at 37 °C.

### RNA isolation from cell lines and Northern blotting

Total RNA was extracted from the above-mentioned cell lines using TRI Reagent (Sigma-Aldrich) according to the manufacturer's instructions. Thirty µg of total RNA was fractionated on a denaturing 12% polyacrylamide gel containing 8M Urea, transferred to a Hybond-N+ membrane (Amersham Biosciences) by semidry method and fixed by UV cross-linking (1200 j/cm<sup>2</sup> for 30 sec). Membranes were probed with <sup>32</sup>P-labelled sequences complementary to each putative novel miRNA. Twenty µmol of each oligonucleotide probe was end-labelled with [ $\gamma$ -<sup>32</sup>P] ATP (Hartmann Analytic) with T4 polynucleotide kinase (New England Biolabs). Prehybridization was carried out in 3 M NaCl, 1 M NaHPO<sub>4</sub>, 20%

SDS, 50X Denhardt's solution, and denatured salmon sperm DNA (Life Technologies). Hybridization was performed in the same solution at 55-60°C. Following hybridization, membranes were washed in 3 M NaCl, 1M NaHPO<sub>4</sub>, 20% SDS, 0.5 M EDTA for 10min. Membranes were exposed 3-5 h prior to signal detection on a FLA-7000 Phosphor Imager.

### **Overexpression and knockdown of novel miRNAs**

To generate mimics of the novel miRNAs, the BLOCK-iTTM Pol II miR RNAi Expression Vector Kit (Life Technologies) was used according to the manufacturer's instructions. MiRCURY LNA™ probes for knockdown of miRNAs were purchased from Exiqon (Vedbaek, Denmark) (NB-miR-5-TCTCTCTGTGTCAGTGTG, NB-miR-19-TAGGGGCCTACAAC GTTG). For nucleofection (all experiments in triplicate), 2 x 10<sup>6</sup> cells were split the day before and were transfected with 2 µg of pcDNA6.2 containing pre-novel-miRNAs or 100 nM miRNA inhibitor using nucleofector V, solution V (Lonza, Basel, Switzerland), and programs M-013 (Raji) and M-13 (SU-DHL-4).

### **Expression of novel miRNAs in cell line and tissue panel**

Expression of novel miRNAs was evaluated in a panel of published miRNA profiles of cell line and tissue datasets (ENCODE project(1); [http://ftp.ebi.ac.uk/pub/databases/ensembl/encode/integration\\_data\\_jan2011/byDataType/rna\\_signal/jan2011/hub/](http://ftp.ebi.ac.uk/pub/databases/ensembl/encode/integration_data_jan2011/byDataType/rna_signal/jan2011/hub/)). These included A549 (adenocarcinoma of the lung), AG04450 (pulmonary fibroblasts), BJ (foreskin fibroblasts), GM12878 (B-lymphoblastoid cell line), H1 (human embryonic stem cells), HeLa-S3 (cervical cancer), HepG2 (hepatocellular carcinoma), HMEC (mammary epithelial cells), HSMM (skeletal muscle myoblasts), HUVEC (human umbilical vein endothelial cells), K562 (chronic myelogenous leukemia), MCF-7 (mammary gland, adenocarcinoma), NHEK (epidermal keratinocytes), NHLF (lung fibroblasts), prostate (prostate tissue), and SK-N-SH\_RA (neuroblastoma cell line, differentiated with retinoic acid).

### **Bioinformatic Methods**

#### *Genome and transcriptome analysis*

RNA-seq reads (average of 11,320,300 / sample) were aligned with *TopHat* (2) (version 2.0.12). Differential gene expression was measured with *edgeR* (3) (version 3.8.6) using inter-sample normalized counts per millions (CPM) and applying multiple testing corrections using FDR. CPMs are normalizing the actual read counts mapping to a respective gene by the entire

number of sequenced reads per sample times 1,000,000 (3). Thereby, CPMs are representing a measure of expression counts that are comparable across multiple samples.

Read pairs obtained by whole genome paired-end sequencing were mapped to the human reference genome (hg19) using BWA (4) version 0.5.9-r16 (maximum insert size of 1 kb). SAMtools (5) was used to generate a coordinate-sorted BAM file, and Picard (version 1.48) was used to merge BAM files from one sample and remove PCR duplicates. Detection of somatic SNVs from tumor and matched control whole genome sequencing data was performed as described previously (6). SNVs were functionally annotated using Annovar (7) and annotated for overlaps with SNPs (dbSNP build 135 and 1000 Genome project data) using BEDTools (8). Allele-specific copy-number alterations were detected as described in Richter et al (9).

#### *MiRNA sequencing data processing and novel miRNA prediction*

Adapter sequences were removed from raw reads using fastx\_clipper ([http://hannonlab.cshl.edu/fastx\\_toolkit/index.html](http://hannonlab.cshl.edu/fastx_toolkit/index.html)). A total of 1,169,752,727 clipped reads were mapped onto the human genome (1000 genomes project, hs37d5100) using segemehl(10), with a minimum accuracy of 90% (average of 20,888,442 reads per sample, see Supplementary Table 2). Quantification of annotated microRNAs from miRBase version 19 was performed using ngsutils (11), partially counting multimapped reads. Read counts were inter-sample normalized leading to CPM values per annotated miRNA. Differential expression was achieved by applying edgeR and subsequent calculation of the FDR for multiple testing correction.

Novel miRNA prediction was performed using miRanalyzer (12) (version 0.3) using default parameters.

#### *MiRNA target prediction*

We used miRanda(13) (version August 2010) to predict potential interaction targets of miRNAs in the transcriptome. For narrowing down the list of miRNA-mRNA target correlations, we filtered for a miRsvr-score  $< -1.2$  per correlation pair. We selected this score as it results in the 5% most significant miRNA-mRNA correlations(14).

## *Differential expression analysis on RNA-Seq data – novel miRNA overexpression/knockdown*

In all sequencing reads, adapters and low quality ends were trimmed using *seqtk* (<https://github.com/lh3/seqtk>) and *cutadapt*(15). All reads shorter than 25 bases after trimming were discarded, leading to 11,320,300 reads on average per sample. Next, the preprocessed reads were aligned against the human genome sequence (hg19) with *TopHat*(2), which is capable of aligning RNA-Seq data because of the identification of splice junctions spanned by individual reads. On average, more than 80% of the preprocessed reads have been aligned against the reference sequence and were used for further analysis. To measure the transcript abundances representing an estimate of the gene expression levels in the samples, *HTSeq*(16) (version 0.5.4) was employed using gene annotations downloaded from Ensembl Genes 75(17). Differential gene expression was measured with *edgeR*(3) using inter-sample normalized counts per millions (CPM) and applying multiple testing corrections using FDR.

## *PAR-CLIP analysis*

The preprocessing of PAR-CLIP reads was similar to that of RNA-Seq reads, however, because short reads align multiple times to the genome, we selected a cutoff of 17 bases per sequencing read after quality and adapter trimming using *cutadapt*. On average, this resulted in about 15,570,345 reads per sequencing sample. Next, reads were aligned with *BWA*(4) allowing for up to two mismatches between a single read sequence and the reference sequence of hg19. All reads that failed in this mapping (mapping quality <10) were aligned against the transcriptome database Ensembl Genes 75 using *BWA* allowing for up to two mismatches between both sequences(18). Next, the aligned reads were piled up into clusters by the PARA-suite (Kloetgen, Borkhardt et al., submitted) which applies a hierarchical clustering algorithm, where reads overlapping by at least 5 bases in their genomic mapping positions are stacked into a single cluster. To identify high confidence RNA-binding protein-bound regions, clusters having <5 reads and <25% T-C conversion frequency were excluded (for further details on analyzing PAR-CLIP datasets see(19)).

To equalize cluster lengths for subsequent mRNA-miRNA correlation analysis, crosslink-centered regions (CCRs) consisting of 20 nucleotides up- and downstream of the major T-C conversion site within a cluster (i.e. the T-C conversion site with the highest conversion frequency per cluster), were generated to calculate all possible 7-mers within the CCRs(20) (Figure 2C). The most significantly enriched (compared to random sequences of the same dinucleotide compositions) corresponded to the reverse complement of the miRNA seed



region. The miRNA-mRNA correlation was achieved by matching miRNA seed positions 2-8 as well as miRNA seed positions 1-7 to the reverse complement of the enriched CCR 7-mers for each cluster. As we also had information on the expression levels of miRNAs and mRNAs, we kept only miRNA-mRNA pairs, which showed a differential expression between BL versus non-BL patient samples (differential expression  $FDR \leq 0.05$ ). All miRNAs meeting this cutoff ( $FDR \leq 0.05$ ) showed log2 fold expression changes of at least  $\pm 0.6$ .

### *Enrichment analysis*

We have performed enrichment analyses by applying a one-sided Fisher's exact test to the number of overlapping genes/miRNAs between two lists, thereby calculating a significance value for the respective enrichment between the two lists. On the one hand, this was applied to identify enrichments between our reported miRNA classifier and recently published miRNA classifiers for the respective lymphoma subtypes. Therefore, the total number of tested miRNAs was taken as a basis (667 in [28] and 602 in [10]). On the other hand, enriched genes of the negatively correlated miRNAs-mRNAs pairs were identified within KEGG pathways. The gene-basis was set to 22,525 genes, which were accessible for differential gene expression analysis based on RNA-Seq data after filtering lowly expressed genes ( $\log CPM < 1$  in all patients of all subgroups). Enrichment scores were calculated as follows:  $\text{Enrichment} = \# \text{overlap} / (\# \text{DE genes} * \# \text{pathway genes} / \# \text{population genes})$ .

### *Expressional correlation analysis*

We have used the spearman's rank correlation to test for significant similarity between two expression patterns. This was applied to check for similar expressions of miRNAs between different platforms, i.e. between NGS derived expression values and qPCR derived expression values. We also used the spearman's rank correlation to check whether the expressional pattern of hsa-miR-143 and hsa-miR-145 were similar across all patient samples.

### *Leave-one-out cross-validation*

To test the validity of our reported miRNA-classifiers, we have performed leave-one-out cross-validation (LOO-CV) on an independent dataset downloaded from NCBI GEO (Accession GSE22420) (21). Because these expression values were obtained from microarray experiments, we used LOO-CV to train our classifier on microarray expression values rather than on cpm values obtained from our RNA-Seq data. Additionally, we had to exclude miRNAs from the classifier which were not covered by the microarray (7 miRNAs each for

the BL vs. DLBCL classifier and the BL vs. DLBCL/FL classifier). The class prediction for the left-out sample was performed using the K-nearest-neighbours algorithm with  $k=33$  (half the size of the smaller BL group containing 64 samples). All cases showing less than 80% majority vote during the class prediction were excluded as not classified. Recall was calculated as the number of remaining predictions per classified cases and overall accuracy was calculated as the number of correct assignments after majority vote exclusion per all tested cases.



## Supplementary Figures

### Supplementary Figure 1

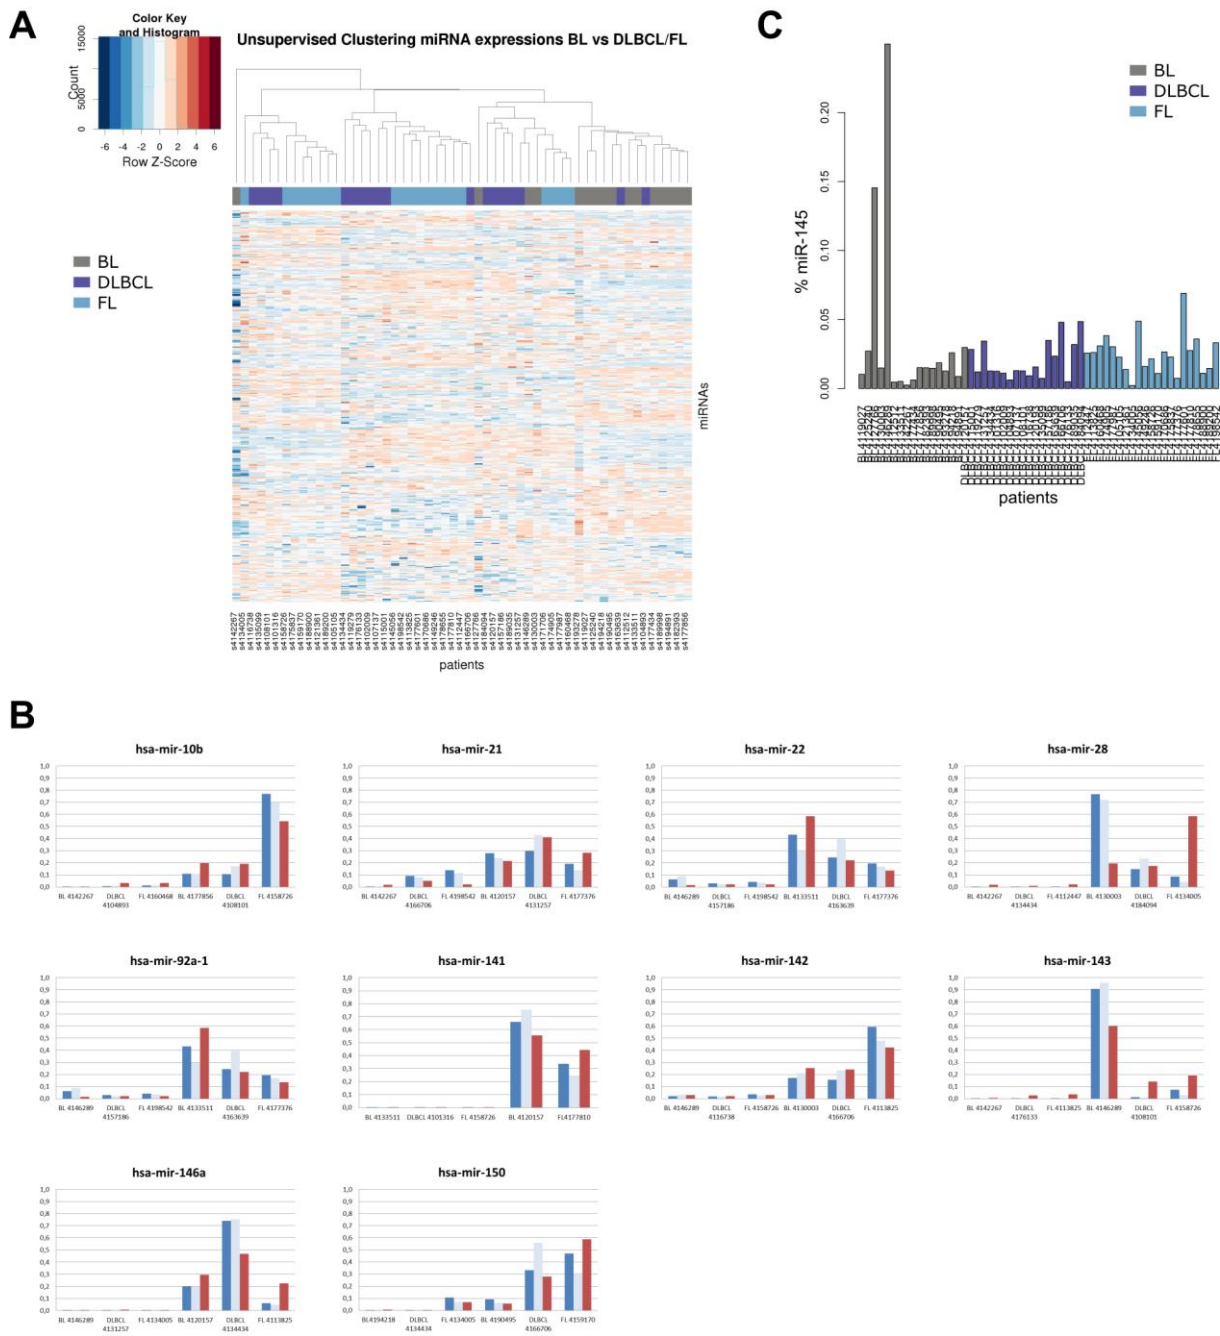

**Supplementary Figure 1. Validation of NGS data.** A) For unsupervised clustering, miRNAs were discarded if less than 16 patients showed a base-line expression of  $> 0$  log<sub>2</sub> cpm after normalization. In total, 573 mature miRNAs were used for unsupervised clustering. FL (light blue), DLBCL (dark blue), and BL (grey). B) Validation of NGS miRNA expression by qRT-PCR. Light blue = qRT-PCR expression (normalized to *RNU48* as housekeeping gene), dark blue = qRT-PCR expression (normalized to *RNU24* as housekeeping gene), red:

expression according to NGS analysis. To allow for comparison across platforms, the expression levels were set to add up to 100 per experiment and are shown as % total expression. Also see Supplementary Table 3 for statistical analysis. C) Hsa-miR-145 expression across all patient samples. Color code as in A).

## Supplementary Figure 2

**A**

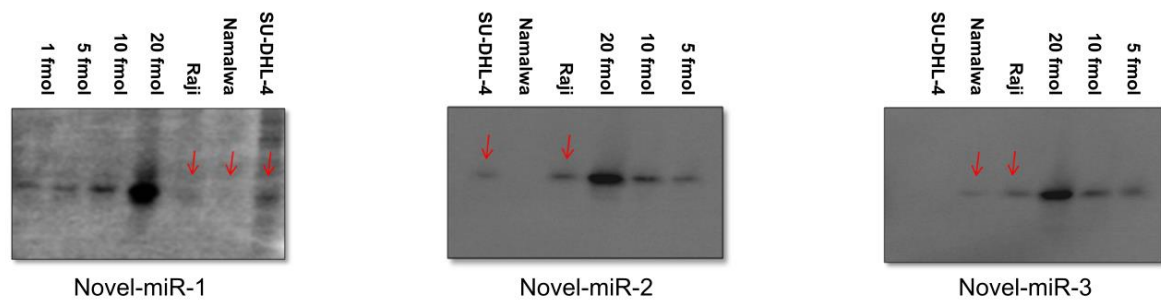

**B**

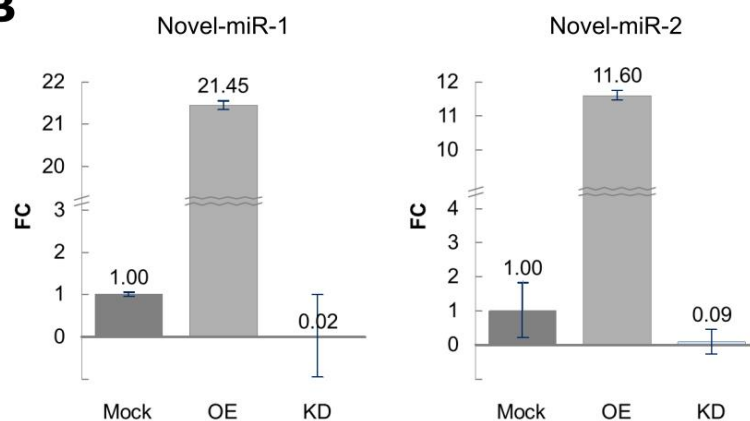

**Supplementary Figure 2. Validation of novel miRNAs.** A) Northern blot results for all three validated novel miRNAs including RNA expression standards in the indicated concentrations. Red arrows point at the correctly processed mature novel miRNAs. Synthesized RNA oligonucleotides (sequences of the respective novel miRNAs) serve as size standards and were used in the indicated concentrations. B) Evaluation of knockdown and overexpression efficiencies of the respective novel miRNA prior to RNASeq. Experiments for novel-miR-1 were performed in SU-DHL-4, for novel-miR-2 in Raji. FC indicates fold change; OE, overexpression; KD, knockdown

## Supplementary Tables

**Supplementary Table 1: Patient information**

| PID     | Diagnosis | Classification 2 | Age at first diagnosis | Gender | MYC_STATUS | BCL2_BREAK | BCL6_BREAK | IGH_status   |
|---------|-----------|------------------|------------------------|--------|------------|------------|------------|--------------|
| 4112512 | BL        | NA               | 18                     | female | IG-MYC pos | negative   | negative   | IGH-MYC pos  |
| 4119027 | BL        | NA               | 12                     | male   | IG-MYC pos | negative   | negative   | IGH-MYC pos  |
| 4125240 | BL        | NA               | 4                      | male   | IG-MYC pos | negative   | negative   | IGH-MYC pos  |
| 4127766 | BL        | NA               | 8                      | male   | IG-MYC pos | negative   | negative   | IGH-MYC pos  |
| 4130003 | BL        | NA               | 6                      | male   | IG-MYC pos | negative   | negative   | IGH neg      |
| 4133511 | BL        | NA               | 5                      | male   | IG-MYC pos | negative   | negative   | IGH-MYC pos  |
| 4142267 | BL        | NA               | 5                      | male   | IG-MYC pos | negative   | negative   | IGH neg      |
| 4146289 | BL        | NA               | 14                     | male   | IG-MYC pos | negative   | negative   | IGH-MYC pos  |
| 4177434 | BL        | NA               | 16                     | female | IG-MYC pos | negative   | negative   | IGH-MYC pos  |
| 4177856 | BL        | NA               | 10                     | male   | IG-MYC pos | negative   | negative   | IGH-MYC pos  |
| 4182393 | BL        | NA               | 10                     | male   | IG-MYC pos | negative   | negative   | IGH-MYC pos  |
| 4189998 | BL        | NA               | 13                     | male   | IG-MYC pos | negative   | negative   | IGH-MYC pos  |
| 4190495 | BL        | NA               | 15                     | male   | IG-MYC pos | negative   | negative   | IGH neg      |
| 4193278 | BL        | NA               | 17                     | male   | IG-MYC pos | negative   | negative   | IGH neg      |
| 4194218 | BL        | NA               | 4                      | male   | IG-MYC pos | negative   | negative   | IGH-MYC pos  |
| 4194891 | BL        | NA               | 4                      | male   | IG-MYC pos | negative   | negative   | IGH-MYC pos  |
| 4101316 | DLBCL     | ABC              | 74                     | female | MYC neg    | negative   | negative   | IGH neg      |
| 4102009 | DLBCL     | ABC              | 64                     | male   | MYC neg    | negative   | negative   | IGH neg      |
| 4104893 | DLBCL     | TypeIII          | 16                     | male   | MYC neg    | negative   | negative   | IGH-IRF4 pos |
| 4107137 | DLBCL     | GCB              | 59                     | male   | MYC neg    | negative   | positive   | IGH pos      |
| 4108101 | DLBCL     | ABC              | 66                     | male   | MYC neg    | negative   | negative   | IGH neg      |
| 4115001 | DLBCL     | GCB              | 70                     | female | MYC neg    | positive   | negative   | IGH-BCL2 pos |
| 4116738 | DLBCL     | TypeIII          | 15                     | male   | MYC neg    | negative   | positive   | IGH neg      |
| 4119279 | DLBCL     | ABC              | 62                     | female | MYC neg    | negative   | negative   | IGH neg      |
| 4120157 | DLBCL     | GCB              | 46                     | male   | MYC neg    | negative   | negative   | IGH pos      |
| 4120193 | DLBCL     | ABC              | 41                     | female | MYC neg    | negative   | negative   | IGH neg      |
| 4131257 | DLBCL     | ABC              | 72                     | male   | MYC neg    | negative   | positive   | IGH pos      |
| 4134434 | DLBCL     | GCB              | 84                     | male   | MYC neg    | positive   | positive   | IGH pos      |
| 4135099 | DLBCL     | ABC              | 49                     | male   | MYC neg    | negative   | positive   | IGH pos      |
| 4157186 | DLBCL     | ABC              | 74                     | male   | MYC neg    | negative   | negative   | IGH neg      |
| 4163639 | DLBCL     | GCB              | 75                     | female | MYC neg    | negative   | negative   | IGH neg      |
| 4166706 | DLBCL     | GCB              | 62                     | male   | MYC neg    | negative   | positive   | IGH pos      |
| 4176133 | DLBCL     | ABC              | 61                     | female | MYC neg    | negative   | positive   | IGH pos      |
| 4184094 | DLBCL     | GCB              | 57                     | female | MYC neg    | positive   | negative   | IGH-BCL2 pos |
| 4189035 | DLBCL     | ABC              | 46                     | male   | MYC neg    | negative   | negative   | IGH neg      |
| 4105105 | FL        | grade 1/2        | 40                     | female | MYC neg    | positive   | negative   | IGH-BCL2 pos |
| 4112447 | FL        | grade 1/2        | 46                     | male   | MYC neg    | positive   | positive   | IGH-BCL2 pos |
| 4113825 | FL        | grade 1/2        | 74                     | female | MYC neg    | negative   | negative   | IGH neg      |
| 4121361 | FL        | grade 1/2        | 74                     | male   | MYC neg    | positive   | negative   | IGH-BCL2 pos |
| 4134005 | FL        | grade 1/2        | 67                     | male   | MYC neg    | positive   | negative   | IGH-BCL2 pos |
| 4145056 | FL        | grade 1/2        | 67                     | female | MYC neg    | positive   | negative   | IGH-BCL2 pos |
| 4149246 | FL        | grade 1/2        | 41                     | male   | MYC neg    | positive   | positive   | IGH-BCL2 pos |
| 4158726 | FL        | grade 1/2        | 48                     | male   | MYC neg    | positive   | negative   | IGH-BCL2 pos |
| 4159170 | FL        | grade 1/2        | 43                     | male   | MYC neg    | positive   | negative   | IGH-BCL2 pos |
| 4160468 | FL        | grade 1/2        | 62                     | male   | MYC neg    | positive   | negative   | IGH-BCL2 pos |
| 4170686 | FL        | grade 1/2        | 56                     | male   | MYC neg    | positive   | negative   | IGH-BCL2 pos |
| 4174905 | FL        | grade 1/2        | 72                     | male   | MYC neg    | positive   | negative   | IGH-BCL2 pos |
| 4175837 | FL        | grade 1/2        | 74                     | female | MYC neg    | positive   | positive   | IGH-BCL2 pos |
| 4177376 | FL        | grade 3A         | 73                     | female | MYC neg    | positive   | negative   | IGH-BCL2 pos |
| 4177601 | FL        | grade 2/3A       | 52                     | female | MYC neg    | positive   | negative   | IGH-BCL2 pos |
| 4177810 | FL        | grade 1/2        | 47                     | female | MYC neg    | positive   | negative   | IGH-BCL2 pos |
| 4177987 | FL        | grade 1/2        | 71                     | male   | MYC neg    | positive   | negative   | IGH-BCL2 pos |
| 4178655 | FL        | grade 1/2        | 50                     | male   | MYC neg    | positive   | negative   | IGH-BCL2 pos |
| 4188900 | FL        | grade 1/2        | 76                     | male   | MYC neg    | positive   | negative   | IGH neg      |
| 4189200 | FL        | grade 1/2        | 51                     | female | MYC neg    | positive   | negative   | IGH-BCL2 pos |
| 4198542 | FL        | grade 1/2/3A     | 68                     | female | MYC neg    | negative   | negative   | IGH neg      |

PID indicates personal identifier; NA, not available

## Supplementary Table 2: miRNA sequencing library statistics

| Diagnosis | PID     | raw reads   | clipped reads | % clipped reads | mapped reads | % mapped reads | reads on primary miRs | % reads on primary miRs |
|-----------|---------|-------------|---------------|-----------------|--------------|----------------|-----------------------|-------------------------|
| BL        | 4112512 | 111,835,821 | 90,656,876    | 81.06%          | 83,739,794   | 92.37%         | 30,310,990            | 36.20%                  |
| BL        | 4119027 | 96,943,814  | 80,372,849    | 82.91%          | 74,224,275   | 92.35%         | 27,687,024            | 37.30%                  |
| BL        | 4125240 | 64,001,808  | 56,406,459    | 88.13%          | 53,503,949   | 94.85%         | 10,026,892            | 18.74%                  |
| BL        | 4127766 | 35,157,062  | 34,510,881    | 98.16%          | 33,693,807   | 97.63%         | 1,706,671             | 5.07%                   |
| BL        | 4130003 | 25,502,310  | 24,828,949    | 97.36%          | 23,122,148   | 93.13%         | 12,787,211            | 55.30%                  |
| BL        | 4133511 | 71,261,813  | 64,018,378    | 89.84%          | 59,083,671   | 92.29%         | 18,112,535            | 30.66%                  |
| BL        | 4142267 | 69,108,952  | 65,274,277    | 94.45%          | 56,674,054   | 86.82%         | 10,070,922            | 17.77%                  |
| BL        | 4146289 | 41,192,177  | 40,108,479    | 97.37%          | 37,541,386   | 93.60%         | 34,377,156            | 91.57%                  |
| BL        | 4177434 | 62,332,955  | 53,529,191    | 85.88%          | 46,581,276   | 87.02%         | 23,865,056            | 51.23%                  |
| BL        | 4177856 | 75,642,487  | 68,181,918    | 90.14%          | 61,370,463   | 90.01%         | 24,861,850            | 40.51%                  |
| BL        | 4182393 | 84,780,972  | 72,038,555    | 84.97%          | 66,059,591   | 91.70%         | 21,585,793            | 32.68%                  |
| BL        | 4189998 | 102,523,454 | 91,607,098    | 89.35%          | 83,325,274   | 90.96%         | 22,585,978            | 27.11%                  |
| BL        | 4190495 | 156,613,394 | 137,235,359   | 87.63%          | 130,397,032  | 95.02%         | 34,428,505            | 26.40%                  |
| BL        | 4193278 | 72,506,909  | 65,405,761    | 90.21%          | 57,367,702   | 87.71%         | 18,460,967            | 32.18%                  |
| BL        | 4194218 | 76,405,749  | 73,447,437    | 96.13%          | 67,907,053   | 92.46%         | 5,543,923             | 8.16%                   |
| BL        | 4194981 | 90,762,811  | 68,540,713    | 75.52%          | 63,179,485   | 92.18%         | 24,980,361            | 39.54%                  |
| DLBCL     | 4101316 | 67,519,903  | 64,199,209    | 95.08%          | 61,007,246   | 95.03%         | 28,775,304            | 47.17%                  |
| DLBCL     | 4102009 | 42,086,479  | 39,944,756    | 94.91%          | 36,818,259   | 92.17%         | 11,789,929            | 32.02%                  |
| DLBCL     | 4104893 | 95,311,645  | 85,124,518    | 89.31%          | 76,526,308   | 89.90%         | 21,888,192            | 28.60%                  |
| DLBCL     | 4107137 | 40,477,513  | 34,734,623    | 85.81%          | 31,436,185   | 90.50%         | 19,242,992            | 61.21%                  |
| DLBCL     | 4108101 | 57,832,471  | 55,071,105    | 95.23%          | 51,979,749   | 94.39%         | 27,543,402            | 52.99%                  |
| DLBCL     | 4115001 | 27,198,492  | 26,148,020    | 96.14%          | 25,497,799   | 97.51%         | 7,386,128             | 28.97%                  |
| DLBCL     | 4116738 | 78,232,596  | 68,884,140    | 88.05%          | 60,645,188   | 88.04%         | 31,000,823            | 51.12%                  |
| DLBCL     | 4119279 | 39,034,533  | 34,535,595    | 88.47%          | 32,847,597   | 95.11%         | 8,154,515             | 24.83%                  |
| DLBCL     | 4120157 | 45,688,615  | 41,860,450    | 91.62%          | 38,598,518   | 92.21%         | 8,676,661             | 22.48%                  |
| DLBCL     | 4120193 | 40,566,871  | 39,713,411    | 97.90%          | 37,901,161   | 95.44%         | 5,340,938             | 14.09%                  |
| DLBCL     | 4131257 | 31,446,420  | 30,697,771    | 97.62%          | 29,248,137   | 95.28%         | 10,648,290            | 36.41%                  |
| DLBCL     | 4134434 | 34,646,386  | 28,750,213    | 82.98%          | 25,728,439   | 89.49%         | 9,642,469             | 37.48%                  |
| DLBCL     | 4135099 | 82,046,323  | 75,673,959    | 92.23%          | 70,326,721   | 92.93%         | 42,315,069            | 60.17%                  |
| DLBCL     | 4157186 | 20,558,444  | 18,165,585    | 88.36%          | 17,261,128   | 95.02%         | 7,126,511             | 41.29%                  |
| DLBCL     | 4163639 | 82,468,882  | 76,639,372    | 92.93%          | 71,664,118   | 93.51%         | 22,990,794            | 32.08%                  |
| DLBCL     | 4166706 | 49,112,501  | 46,502,593    | 94.69%          | 43,144,375   | 92.78%         | 26,491,474            | 61.40%                  |
| DLBCL     | 4176133 | 27,241,860  | 26,650,486    | 97.83%          | 25,782,166   | 96.74%         | 4,973,146             | 19.29%                  |
| DLBCL     | 4184094 | 37,960,574  | 35,916,452    | 94.62%          | 33,999,067   | 94.66%         | 4,891,289             | 14.39%                  |
| DLBCL     | 4189035 | 39,456,122  | 33,743,677    | 85.52%          | 30,162,878   | 89.39%         | 18,823,323            | 62.41%                  |
| FL        | 4105105 | 66,137,979  | 64,339,942    | 97.28%          | 62,248,882   | 96.75%         | 33,016,425            | 53.04%                  |
| FL        | 4112447 | 45,773,088  | 42,548,261    | 92.95%          | 40,644,074   | 95.52%         | 10,268,194            | 25.26%                  |
| FL        | 4113825 | 41,550,848  | 31,506,429    | 75.83%          | 26,934,801   | 85.49%         | 15,915,215            | 59.09%                  |
| FL        | 4121361 | 73,759,960  | 67,969,941    | 92.15%          | 63,948,878   | 94.08%         | 49,654,552            | 77.65%                  |
| FL        | 4134005 | 67,942,851  | 61,098,231    | 89.93%          | 58,991,880   | 96.55%         | 12,599,478            | 21.36%                  |
| FL        | 4145056 | 26,282,929  | 23,842,066    | 90.71%          | 20,609,766   | 86.44%         | 9,084,189             | 44.08%                  |
| FL        | 4149246 | 20,825,007  | 15,932,481    | 76.51%          | 14,785,326   | 92.80%         | 12,274,678            | 83.02%                  |
| FL        | 4158726 | 80,798,657  | 77,575,725    | 96.01%          | 72,581,907   | 93.56%         | 56,127,947            | 77.33%                  |
| FL        | 4159170 | 90,316,042  | 87,915,910    | 97.34%          | 84,580,056   | 96.21%         | 48,098,750            | 56.87%                  |
| FL        | 4160468 | 66,934,137  | 64,234,781    | 95.97%          | 57,676,380   | 89.79%         | 45,480,635            | 78.85%                  |
| FL        | 4170686 | 28,225,201  | 28,047,528    | 99.37%          | 27,224,450   | 97.07%         | 6,080,646             | 22.34%                  |
| FL        | 4174905 | 40,688,848  | 39,370,043    | 96.76%          | 36,779,632   | 93.42%         | 17,879,064            | 48.61%                  |
| FL        | 4175837 | 145,487,505 | 142,602,072   | 98.02%          | 138,805,355  | 97.34%         | 47,162,234            | 33.98%                  |
| FL        | 4177376 | 59,033,653  | 57,041,478    | 96.63%          | 54,405,387   | 95.38%         | 29,629,182            | 54.46%                  |
| FL        | 4177601 | 39,845,682  | 39,113,638    | 98.16%          | 37,491,676   | 95.85%         | 5,775,674             | 15.41%                  |
| FL        | 4177810 | 23,339,328  | 22,495,874    | 96.39%          | 21,827,428   | 97.03%         | 9,958,437             | 45.62%                  |
| FL        | 4177987 | 38,144,137  | 34,176,587    | 89.60%          | 31,030,702   | 90.80%         | 21,971,916            | 70.81%                  |
| FL        | 4178655 | 33,166,391  | 29,713,962    | 89.59%          | 27,842,516   | 93.70%         | 21,914,993            | 78.71%                  |
| FL        | 4188900 | 87,727,261  | 78,502,242    | 89.48%          | 71,530,316   | 91.12%         | 40,556,165            | 56.70%                  |
| FL        | 4189200 | 62,264,380  | 29,431,654    | 47.27%          | 26,122,247   | 88.76%         | 23,250,761            | 89.01%                  |
| FL        | 4198542 | 41,391,420  | 38,304,878    | 92.54%          | 36,352,845   | 94.90%         | 13,960,509            | 38.40%                  |

PID indicates personal identifier;

**Supplementary Table 3:** Validation of NGS expression via qRT-PCR of select miRNAs

| miRNA         | qRT-PCR RNU24 vs. NGS | qRT-PCR RNU48 vs. NGS |
|---------------|-----------------------|-----------------------|
| hsa-mir-10b   | <b>0.003</b>          | <b>0.017</b>          |
| hsa-mir-21    | <b>0.033</b>          | <b>0.033</b>          |
| hsa-mir-22    | <b>0.017</b>          | <b>0.017</b>          |
| hsa-mir-28    | 0.058                 | 0.058                 |
| hsa-mir-92a-1 | 0.103                 | 0.136                 |
| hsa-mir-141   | 0.083                 | 0.083                 |
| hsa-mir-142   | <b>0.003</b>          | <b>0.033</b>          |
| hsa-mir-143   | <b>0.003</b>          | <b>0.003</b>          |
| hsa-mir-146a  | <b>0.003</b>          | <b>0.003</b>          |
| hsa-mir-150   | <b>0.003</b>          | <b>0.017</b>          |

P-values of the correlation analyses between qRT-PCRs with two housekeeping genes (RNU24 and RNU48) versus expression as determined by NGS are indicated. P-values  $\leq 0.05$  are highlighted.

**Supplementary Table 4:** 25 miRNA classifiers separating B-cell lymphoma subtypes

| miRNA            | logFC | logCPM | p-value  | FDR      | cpm BL  | cpm DLBCL |
|------------------|-------|--------|----------|----------|---------|-----------|
| hsa-miR-20a-3p   | -2.50 | 4.07   | 1.92E-12 | 9.71E-10 | 29.57   | 5.22      |
| hsa-miR-221-3p   | 2.89  | 11.04  | 8.01E-12 | 2.02E-09 | 478.24  | 3539.57   |
| hsa-miR-146a-5p  | 4.22  | 16.55  | 1.81E-11 | 3.05E-09 | 9293.79 | 172652.84 |
| hsa-miR-141-3p   | 8.14  | 12.63  | 9.70E-11 | 1.02E-08 | 42.20   | 11905.84  |
| hsa-miR-155-5p   | 3.87  | 13.27  | 1.03E-10 | 1.02E-08 | 1197.20 | 17531.21  |
| hsa-miR-25-5p    | -2.44 | 5.51   | 1.21E-10 | 1.02E-08 | 79.98   | 14.70     |
| hsa-miR-196b-5p  | 3.76  | 5.16   | 7.07E-10 | 4.46E-08 | 4.64    | 63.07     |
| hsa-miR-3681-5p  | 5.32  | 5.31   | 6.54E-10 | 4.46E-08 | 1.83    | 73.42     |
| hsa-miR-200c-3p  | 4.70  | 7.67   | 1.33E-09 | 7.45E-08 | 14.33   | 370.91    |
| hsa-miR-24-3p    | 2.66  | 8.88   | 2.58E-09 | 1.30E-07 | 123.21  | 780.97    |
| hsa-miR-196a-5p  | 4.03  | 2.91   | 2.91E-09 | 1.34E-07 | 0.81    | 13.30     |
| hsa-miR-664-3p   | 2.79  | 5.99   | 4.82E-09 | 2.03E-07 | 15.34   | 106.32    |
| hsa-miR-130b-3p  | -1.69 | 8.82   | 7.99E-09 | 3.04E-07 | 713.64  | 220.80    |
| hsa-miR-664-5p   | 2.94  | 4.31   | 8.43E-09 | 3.04E-07 | 4.35    | 33.58     |
| hsa-miR-10b-3p   | 2.93  | 2.79   | 1.18E-08 | 3.92E-07 | 1.49    | 11.62     |
| hsa-miR-29b-2-5p | 1.93  | 2.24   | 1.24E-08 | 3.92E-07 | 1.82    | 7.14      |
| hsa-miR-23a-5p   | 2.24  | 2.76   | 1.62E-08 | 4.82E-07 | 2.24    | 10.60     |
| hsa-miR-944      | 3.95  | 6.01   | 3.24E-08 | 9.08E-07 | 7.40    | 114.75    |
| hsa-miR-193a-5p  | 2.09  | 6.56   | 3.87E-08 | 1.03E-06 | 34.58   | 147.85    |
| hsa-miR-4677-3p  | 2.70  | 4.79   | 4.96E-08 | 1.25E-06 | 7.08    | 45.92     |
| hsa-miR-339-5p   | -2.26 | 5.89   | 5.64E-08 | 1.35E-06 | 101.54  | 21.14     |
| hsa-miR-589-3p   | -2.05 | 3.46   | 5.86E-08 | 1.35E-06 | 18.22   | 4.31      |
| hsa-miR-98       | 2.09  | 11.99  | 6.24E-08 | 1.37E-06 | 1492.12 | 6346.58   |
| hsa-miR-222-3p   | 2.12  | 9.93   | 7.27E-08 | 1.51E-06 | 351.22  | 1525.88   |
| hsa-miR-374a-5p  | 2.50  | 8.15   | 7.47E-08 | 1.51E-06 | 81.97   | 464.14    |

| <b>miRNA</b>     | <b>logFC</b> | <b>logCPM</b> | <b>p-value</b> | <b>FDR</b> | <b>cpm BL</b> | <b>cpm FL</b> |
|------------------|--------------|---------------|----------------|------------|---------------|---------------|
| hsa-miR-150-3p   | 3.75         | 4.97          | 4.45E-26       | 1.04E-23   | 3.85          | 52.05         |
| hsa-miR-150-5p   | 4.12         | 12.86         | 6.01E-26       | 1.04E-23   | 722.73        | 12575.15      |
| hsa-miR-20a-3p   | -3.15        | 3.94          | 3.55E-26       | 1.04E-23   | 30.87         | 3.41          |
| hsa-miR-19a-5p   | -3.13        | 3.70          | 2.30E-23       | 2.97E-21   | 25.92         | 2.97          |
| hsa-miR-18a-3p   | -3.49        | 5.48          | 3.79E-22       | 3.92E-20   | 92.00         | 8.13          |
| hsa-miR-335-3p   | -3.58        | 8.20          | 7.95E-22       | 6.85E-20   | 614.46        | 51.34         |
| hsa-miR-378a-3p  | -2.43        | 10.47         | 1.01E-21       | 7.49E-20   | 2641.93       | 489.06        |
| hsa-miR-184      | 4.86         | 3.88          | 8.06E-21       | 5.21E-19   | 0.85          | 25.05         |
| hsa-miR-130b-3p  | -2.79        | 8.61          | 1.25E-19       | 7.16E-18   | 760.44        | 110.29        |
| hsa-miR-18a-5p   | -3.01        | 7.05          | 9.84E-19       | 4.62E-17   | 263.04        | 32.68         |
| hsa-miR-25-5p    | -3.09        | 5.38          | 9.76E-19       | 4.62E-17   | 83.37         | 9.80          |
| hsa-miR-19b-1-5p | -2.77        | 1.39          | 2.07E-18       | 8.94E-17   | 4.84          | 0.73          |
| hsa-miR-151b     | 3.67         | 7.05          | 4.25E-17       | 1.69E-15   | 17.20         | 220.12        |
| hsa-miR-17-5p    | -2.32        | 9.52          | 1.91E-16       | 7.04E-15   | 1348.29       | 269.90        |
| hsa-miR-92a-1-5p | -2.59        | 4.43          | 4.09E-16       | 1.41E-14   | 40.81         | 6.82          |
| hsa-miR-221-3p   | 2.60         | 10.96         | 6.85E-16       | 2.21E-14   | 516.96        | 3123.54       |
| hsa-miR-17-3p    | -3.53        | 10.08         | 1.38E-15       | 4.20E-14   | 2252.58       | 194.47        |
| hsa-miR-4517     | -3.19        | 1.51          | 4.84E-15       | 1.39E-13   | 5.68          | 0.61          |
| hsa-miR-29c-5p   | 2.32         | 5.53          | 1.32E-14       | 3.60E-13   | 14.05         | 70.51         |
| hsa-miR-664-5p   | 2.55         | 4.12          | 1.62E-14       | 4.19E-13   | 4.61          | 26.97         |
| hsa-miR-3622a-5p | 3.63         | 1.02          | 4.44E-14       | 1.09E-12   | 0.27          | 3.20          |
| hsa-miR-4420     | -3.99        | 2.35          | 2.22E-13       | 5.22E-12   | 10.97         | 0.66          |
| hsa-miR-377-5p   | -3.44        | 1.75          | 1.75E-12       | 3.93E-11   | 6.65          | 0.58          |
| hsa-miR-29b-3p   | 2.57         | 9.29          | 9.31E-12       | 2.01E-10   | 164.06        | 976.85        |
| hsa-miR-19a-3p   | -2.73        | 10.01         | 1.07E-11       | 2.20E-10   | 1987.69       | 300.17        |

Table is sorted by FDR. logFC indicates log fold change; logCPM, log counts per million, FDR, false discovery rate

| <b>miRNA</b>     | <b>logFC</b> | <b>logCPM</b> | <b>p-value</b> | <b>FDR</b> | <b>cpm FL</b> | <b>cpm DLBCL</b> |
|------------------|--------------|---------------|----------------|------------|---------------|------------------|
| hsa-miR-200c-3p  | -3.89        | 7.26          | 8.36E-11       | 4.16E-08   | 20.77         | 307.99           |
| hsa-miR-424-3p   | -2.12        | 3.98          | 2.60E-10       | 6.48E-08   | 6.16          | 26.89            |
| hsa-miR-147b     | -3.41        | 2.08          | 2.76E-09       | 4.58E-07   | 0.76          | 8.11             |
| hsa-miR-3622a-5p | 2.65         | 0.84          | 9.35E-09       | 7.76E-07   | 2.75          | 0.42             |
| hsa-miR-4517     | -2.34        | 0.64          | 7.56E-09       | 7.76E-07   | 0.52          | 2.64             |
| hsa-miR-503      | -1.81        | 1.81          | 8.73E-09       | 7.76E-07   | 1.60          | 5.53             |
| hsa-miR-486-3p   | 2.64         | 5.25          | 1.34E-08       | 9.55E-07   | 62.03         | 9.95             |
| hsa-miR-148a-5p  | -2.64        | 9.30          | 3.26E-08       | 2.03E-06   | 184.70        | 1148.17          |
| hsa-miR-378a-3p  | -1.48        | 9.55          | 4.12E-08       | 2.28E-06   | 411.38        | 1146.34          |
| hsa-miR-18a-3p   | -1.80        | 3.84          | 5.79E-07       | 2.62E-05   | 6.62          | 23.09            |
| hsa-miR-4449     | -2.68        | 2.42          | 5.26E-07       | 2.62E-05   | 1.53          | 9.72             |
| hsa-miR-92a-1-5p | -2.22        | 3.99          | 6.35E-07       | 2.64E-05   | 5.93          | 27.53            |
| hsa-miR-129-2-3p | -4.30        | 3.72          | 9.54E-07       | 3.45E-05   | 1.34          | 26.66            |
| hsa-miR-3653     | 2.93         | 4.98          | 9.69E-07       | 3.45E-05   | 52.34         | 6.81             |
| hsa-miR-19a-5p   | -2.09        | 2.71          | 1.97E-06       | 6.13E-05   | 2.59          | 11.04            |
| hsa-miR-29b-3p   | 1.69         | 9.11          | 1.86E-06       | 6.13E-05   | 809.33        | 250.37           |
| hsa-miR-4464     | 3.47         | 2.53          | 3.12E-06       | 9.13E-05   | 9.73          | 0.87             |
| hsa-miR-450b-5p  | -1.52        | 4.12          | 3.76E-06       | 1.04E-04   | 9.28          | 26.54            |
| hsa-miR-18a-5p   | -1.65        | 5.78          | 3.97E-06       | 1.04E-04   | 27.74         | 86.86            |
| hsa-miR-29a-3p   | 1.62         | 13.09         | 4.69E-06       | 1.16E-04   | 12651.18      | 4113.90          |
| hsa-miR-431-5p   | -1.83        | 1.21          | 4.88E-06       | 1.16E-04   | 1.00          | 3.62             |
| hsa-miR-944      | -2.57        | 5.67          | 5.93E-06       | 1.34E-04   | 15.53         | 92.18            |
| hsa-miR-150-5p   | 1.90         | 12.79         | 6.55E-06       | 1.39E-04   | 10730.09      | 2878.09          |
| hsa-miR-20a-5p   | -1.93        | 10.01         | 6.70E-06       | 1.39E-04   | 449.16        | 1706.57          |
| hsa-miR-7-5p     | -2.22        | 7.18          | 8.53E-06       | 1.70E-04   | 53.95         | 251.76           |

Table is sorted by FDR. logFC indicates log fold change; logCPM, log counts per million, FDR, false discovery rate



**Supplementary Table 5: Differentially regulated genes targeted by hsa-miR-143**

| gene     | p-value | pears. corr. | gene     | p-value | pears. corr. | gene       | p-value | pears. corr. |
|----------|---------|--------------|----------|---------|--------------|------------|---------|--------------|
| AMFR     | 0.0001  | -0.56        | USP22    | 0.0090  | -0.38        | DCUN1D1    | 0.0281  | -0.32        |
| FOXO1    | 0.0001  | -0.54        | PAG1     | 0.0094  | -0.38        | RBBP6      | 0.0294  | -0.32        |
| SMARCD2  | 0.0001  | -0.54        | FAM104A  | 0.0096  | -0.38        | GFER       | 0.0297  | -0.32        |
| IFT52    | 0.0001  | -0.53        | ZMYM2    | 0.0097  | -0.38        | PKN2       | 0.0300  | -0.32        |
| POLDIP3  | 0.0002  | -0.53        | CDK17    | 0.0098  | -0.38        | G2E3       | 0.0308  | -0.32        |
| CTDSPL2  | 0.0002  | -0.53        | PPM1A    | 0.0102  | -0.37        | PRKAB1     | 0.0318  | -0.31        |
| PEX5     | 0.0002  | -0.52        | LRBA     | 0.0102  | -0.37        | WDTC1      | 0.0320  | -0.31        |
| ASIC2    | 0.0002  | -0.52        | FOXJ3    | 0.0104  | -0.37        | SLU7       | 0.0321  | -0.31        |
| GGA2     | 0.0002  | -0.52        | UBXN1    | 0.0109  | -0.37        | RICTOR     | 0.0321  | -0.31        |
| GNA13    | 0.0003  | -0.52        | RNF8     | 0.0110  | -0.37        | POU2F1     | 0.0334  | -0.31        |
| KDM3B    | 0.0003  | -0.51        | PHF6     | 0.0112  | -0.37        | MGA        | 0.0336  | -0.31        |
| PSIP1    | 0.0003  | -0.51        | PRKD2    | 0.0113  | -0.37        | PCBP2      | 0.0339  | -0.31        |
| CAMK2D   | 0.0003  | -0.51        | WBP11    | 0.0114  | -0.37        | GPBP1      | 0.0341  | -0.31        |
| KDM3A    | 0.0004  | -0.50        | PHTF2    | 0.0119  | -0.37        | PAPOLB     | 0.0346  | -0.31        |
| CCDC94   | 0.0004  | -0.50        | GGNBP2   | 0.0123  | -0.36        | JARID2.AS1 | 0.0349  | -0.31        |
| CUL3     | 0.0004  | -0.50        | MARK2    | 0.0128  | -0.36        | MTPN       | 0.0360  | -0.31        |
| GCNT7    | 0.0005  | -0.49        | C12orf49 | 0.0137  | -0.36        | PUM2       | 0.0361  | -0.31        |
| RC3H2    | 0.0006  | -0.48        | UBE2E1   | 0.0137  | -0.36        | APC        | 0.0362  | -0.31        |
| CBFB     | 0.0006  | -0.48        | MIER3    | 0.0138  | -0.36        | TOE1       | 0.0371  | -0.31        |
| POLR2G   | 0.0010  | -0.47        | VCIPI1   | 0.0139  | -0.36        | RCOR1      | 0.0372  | -0.31        |
| KIAA1432 | 0.0010  | -0.47        | DHX40    | 0.0141  | -0.36        | KMT2E      | 0.0376  | -0.30        |
| NUDT16L1 | 0.0013  | -0.46        | MED1     | 0.0144  | -0.36        | DENND1B    | 0.0379  | -0.30        |
| AFF2     | 0.0015  | -0.46        | CRLF3    | 0.0148  | -0.35        | COMMD4     | 0.0386  | -0.30        |
| MED26    | 0.0015  | -0.45        | GCNT2    | 0.0148  | -0.35        | OXCT1.AS1  | 0.0392  | -0.30        |
| PSPC1    | 0.0018  | -0.45        | POM121C  | 0.0151  | -0.35        | MDC1       | 0.0396  | -0.30        |
| RAD17    | 0.0019  | -0.45        | RNF6     | 0.0151  | -0.35        | DMXL1      | 0.0405  | -0.30        |
| ACTR3    | 0.0020  | -0.44        | RBM22    | 0.0157  | -0.35        | MAPRE2     | 0.0407  | -0.30        |
| MYO1E    | 0.0020  | -0.44        | CHD6     | 0.0163  | -0.35        | CEP192     | 0.0409  | -0.30        |
| USP24    | 0.0021  | -0.44        | UBP1     | 0.0163  | -0.35        | POM121     | 0.0409  | -0.30        |
| PHF3     | 0.0021  | -0.44        | TXLNB    | 0.0168  | -0.35        | CLCN3      | 0.0414  | -0.30        |
| CALM3    | 0.0021  | -0.44        | SCAF8    | 0.0170  | -0.35        | NECAP1     | 0.0419  | -0.30        |
| CHMP1A   | 0.0022  | -0.44        | IRAK1BP1 | 0.0175  | -0.35        | MTMR4      | 0.0421  | -0.30        |
| STK16    | 0.0027  | -0.43        | RASGEF1B | 0.0178  | -0.35        | DIAPH1     | 0.0422  | -0.30        |
| BARD1    | 0.0027  | -0.43        | WIPF1    | 0.0182  | -0.34        | KIAA1033   | 0.0429  | -0.30        |
| LANCL1   | 0.0027  | -0.43        | RRM2B    | 0.0188  | -0.34        | ZCCHC11    | 0.0432  | -0.30        |
| HELZ     | 0.0027  | -0.43        | MBOAT2   | 0.0191  | -0.34        | BCL10      | 0.0435  | -0.30        |
| TNKS2    | 0.0029  | -0.43        | SUPT4H1  | 0.0193  | -0.34        | HNRNPU     | 0.0438  | -0.30        |
| RBM27    | 0.0030  | -0.43        | SUZ12    | 0.0196  | -0.34        | JAKMIP2    | 0.0440  | -0.30        |
| MAP4K1   | 0.0033  | -0.42        | CDC27    | 0.0198  | -0.34        | KIF3A      | 0.0441  | -0.30        |
| DDX42    | 0.0033  | -0.42        | BRD2     | 0.0204  | -0.34        | GPCPD1     | 0.0444  | -0.30        |
| TSPAN13  | 0.0038  | -0.42        | HDAC7    | 0.0206  | -0.34        | INO80D     | 0.0455  | -0.29        |
| PRKCE    | 0.0042  | -0.41        | GMEB1    | 0.0208  | -0.34        | OSBPL9     | 0.0455  | -0.29        |
| URM1     | 0.0043  | -0.41        | NIN      | 0.0209  | -0.34        | UBE3C      | 0.0457  | -0.29        |
| LNPEP    | 0.0043  | -0.41        | ACAP2    | 0.0228  | -0.33        | HMGCR      | 0.0471  | -0.29        |
| CDK13    | 0.0044  | -0.41        | MLLT10   | 0.0236  | -0.33        | CIAPIN1    | 0.0472  | -0.29        |
| EIF2AK3  | 0.0045  | -0.41        | RNF169   | 0.0241  | -0.33        | RABEP1     | 0.0482  | -0.29        |
| C16orf80 | 0.0045  | -0.41        | YWHAZ    | 0.0247  | -0.33        | YPEL5      | 0.0490  | -0.29        |
| BPTF     | 0.0048  | -0.41        | ARFGEF2  | 0.0249  | -0.33        | OARD1      | 0.0015  | -0.46        |
| ZNF800   | 0.0052  | -0.40        | SLC15A4  | 0.0249  | -0.33        | PATZ1      | 0.0039  | -0.42        |
| VHL      | 0.0057  | -0.40        | KIAA0430 | 0.0250  | -0.33        | UBE2D3     | 0.0078  | -0.39        |
| PAN3     | 0.0059  | -0.40        | OPA1     | 0.0250  | -0.33        | PPM1D      | 0.0110  | -0.37        |
| LIMK1    | 0.0065  | -0.39        | OPA1.AS1 | 0.0254  | -0.33        | NEK6       | 0.0119  | -0.37        |
| C12orf76 | 0.0067  | -0.39        | ATG2B    | 0.0259  | -0.33        | SF1        | 0.0143  | -0.36        |
| KLF12    | 0.0070  | -0.39        | APAF1    | 0.0263  | -0.32        | FBXO46     | 0.0185  | -0.34        |
| ZNF318   | 0.0072  | -0.39        | SOX5     | 0.0263  | -0.32        | PACS1      | 0.0200  | -0.34        |
| PPP2R2A  | 0.0079  | -0.38        | DCP2     | 0.0264  | -0.32        | GOLGA4     | 0.0263  | -0.33        |
| UPF1     | 0.0079  | -0.38        | MUL1     | 0.0270  | -0.32        | JOSD1      | 0.0409  | -0.30        |
| GMFB     | 0.0084  | -0.38        | ZNF451   | 0.0273  | -0.32        | SF3B1      | 0.0427  | -0.30        |
| UBE2R2   | 0.0086  | -0.38        | CYFIP2   | 0.0277  | -0.32        | KCMF1      | 0.0448  | -0.29        |
| FAM134A  | 0.0088  | -0.38        | ZNF543   | 0.0278  | -0.32        | EBF1       | 0.0467  | -0.29        |
| GNB1     | 0.0089  | -0.38        | KAT7     | 0.0279  | -0.32        | NUDT17     | 0.0498  | -0.29        |
| SEPT9    | 0.0089  | -0.38        | TMPO.AS1 | 0.0280  | -0.32        | SSH2       | 0.0500  | -0.29        |

Table is sorted by p-value. Pears. corr. indicates pearson correlation

**Supplementary Table 6:** Genes associated with the GO term “ubiquitin-protein transferase activity” targeted by hsa-miR-143

| gene symbol | full name                                       |
|-------------|-------------------------------------------------|
| AMFR        | autocrine motility factor receptor              |
| BARD1       | brca1 associated ring domain 1                  |
| CUL3        | cullin 3                                        |
| G2E3        | g2/m-phase specific e3 ubiquitin protein ligase |
| MUL1        | mitochondrial e3 ubiquitin protein ligase 1     |
| RBBP6       | retinoblastoma binding protein 6                |
| RC3H2       | ring finger and ccch-type domains 2             |
| RNF6        | ring finger protein (c3h2c3 type) 6]            |
| RNF8        | ring finger protein 8                           |
| UBE2D3      | ubiquitin-conjugating enzyme e2d 3              |
| UBE2E1      | ubiquitin-conjugating enzyme e2e 1              |
| UBE2R2      | ubiquitin-conjugating enzyme e2r 2              |
| UBE3C       | ubiquitin protein ligase e3c                    |
| VHL         | von hippel-lindau tumor suppressor              |

**Supplementary Table 7:** Gene Ontology (GO) terms associated with the 186 predicted hsa-miR-143/mRNA target pairs

| GO Term    | Description                            | P-value     | FDR q-value | Enrichment |
|------------|----------------------------------------|-------------|-------------|------------|
| GO:0005515 | protein binding                        | 1.34E-09    | 0.0000054   | 1.49       |
| GO:0005488 | binding                                | 5.47E-08    | 0.00011     | 1.25       |
| GO:1901363 | heterocyclic compound binding          | 5.49E-08    | 0.0000739   | 1.62       |
| GO:0097159 | organic cyclic compound binding        | 0.000000103 | 0.000103    | 1.6        |
| GO:0019899 | enzyme binding                         | 0.000000338 | 0.000273    | 2.6        |
| GO:0004842 | ubiquitin-protein transferase activity | 0.00000042  | 0.000283    | 5.33       |
| GO:0003676 | nucleic acid binding                   | 0.00000276  | 0.00159     | 1.71       |
| GO:0008270 | zinc ion binding                       | 0.00000548  | 0.00276     | 2.47       |
| GO:0016740 | transferase activity                   | 0.00000885  | 0.00397     | 2.03       |
| GO:0003682 | chromatin binding                      | 0.00000913  | 0.00368     | 3.85       |
| GO:0046914 | transition metal ion binding           | 0.0000093   | 0.00341     | 2.27       |
| GO:0003723 | RNA binding                            | 0.00000992  | 0.00334     | 2.23       |

Table is sorted by p-value. FDR indicates false discovery rate

**Supplementary Table 8:** List of all tested, bioinformatically predicted putative novel miRNAs

| <b>NB-probe #</b> | <b>genomic location</b>  | <b>mature miRNA sequence</b> |
|-------------------|--------------------------|------------------------------|
| NB-miR-1          | chr1:43914204-43914292   | CCAGGGCAGAGGGCACAGGAATCT     |
| NB-miR-2          | chr20:43272717-43272813  | GCAGGGCCGTCTACCTCCAAGGC      |
| NB-miR-3          | chr3:156878062-156878153 | ACCTTGGGATCCTCAGAGGCTG       |
| NB-miR-4          | chr8:27290881-27290962   | TTGGCTGGTCTCTGCTCCGCAGG      |
| NB-miR-5          | chr10:50035510-50035603  | GCACACTGACACAGAGAGAGAGA      |
| NB-miR-6          | chr20:43272714-43272812  | CAGGGCCGTCTACCTCCAAGGC       |
| NB-miR-7          | chr10:75936514-75936605  | AAGCAGTTGCTGTGGTACCTGCT      |
| NB-miR-8          | chr5:72143946-72144041   | AGACGCTGGCGGCCGGGCTGCCA      |
| NB-miR-9          | chr1:43914204-43914292   | CAGGCCTGTGGCTCCTCCCTCA       |
| NB-miR-10         | chr1:32410164-32410309   | CCTCCTCAGGCACTAGAGCTTCCC     |
| NB-miR-11         | chr20:43272714-43272812  | CAAGGCAAACCTAGTCAGATTA       |
| NB-miR-12         | chr2:219206629-219206714 | GTCCCCTGCTCCCTTGTCCCCAGTC    |
| NB-miR-13         | chr17:73008757-73008842  | CGCAAGACCTGAGCATGGCGGCCA     |
| NB-miR-14         | chr17:73008757-73008842  | CTGCGCTGGGGCCTGAGCCGAGC      |
| NB-miR-15         | chrX:118533303-118533392 | CCGGAGAGCCCCAGGCCCGAGCC      |
| NB-miR-16         | chr11:64863680-64863778  | GCCGGGCCTAGCCCGGGGTCTGGAC    |
| NB-miR-17         | chr15:45003719-45003814  | AGCATTCGGGCCGAGATGTCTCG      |
| NB-miR-18         | chrM:3363-3463           | GTAGGCCCTACGGGCTACTACAACCCT  |
| NB-miR-19         | chrM:3363-3463           | CCAACGTTGTAGGCCCTACGGGCTACT  |
| NB-miR-20         | chr12:52453530-52453613  | TCACTGCAGGGCCCTAGCAATA       |

MiRNAs, which could be validated by Northern blotting (NB), are shaded in grey.

NB-probe indicates Northern blot probe number

**Supplementary Table 9:** Genes having both a novel-miR-1 seed sequence and being differentially expressed upon novel-miR-1 overexpression

| Gene    | logFC | logCPM | p-value | FDR   | cpm control | cpm sample | miranda score | miranda mfe |
|---------|-------|--------|---------|-------|-------------|------------|---------------|-------------|
| ACAD9   | -0.69 | 5.58   | 0.000   | 0.009 | 53.07       | 33.47      | 147           | -17.42      |
| ACO2    | -0.33 | 7.52   | 0.000   | 0.027 | 198.07      | 157.34     | 161           | -21.91      |
| ADAM15  | -0.48 | 6.60   | 0.000   | 0.010 | 106.53      | 76.07      | 283           | -32.58      |
| ATP13A2 | -0.76 | 5.01   | 0.000   | 0.018 | 35.12       | 21.10      | 146           | -22.28      |
| CARD11  | -0.37 | 7.72   | 0.000   | 0.010 | 231.27      | 180.22     | 148           | -19.67      |
| CBS     | -0.50 | 6.09   | 0.000   | 0.020 | 74.65       | 52.48      | 151           | -19.54      |
| CD247   | -0.82 | 4.49   | 0.001   | 0.029 | 24.92       | 13.78      | 140           | -15.55      |
| CDC45   | -0.68 | 5.51   | 0.000   | 0.018 | 49.98       | 31.47      | 153           | -18.18      |
| CDCA7   | -0.48 | 7.45   | 0.000   | 0.008 | 195.33      | 140.63     | 307           | -39.83      |
| CDK5    | -1.00 | 4.31   | 0.000   | 0.014 | 21.59       | 10.70      | 140           | -17.99      |
| CENPM   | -0.88 | 5.20   | 0.000   | 0.001 | 41.45       | 22.40      | 155           | -21.74      |
| CRELD2  | -0.73 | 4.76   | 0.001   | 0.035 | 29.31       | 17.61      | 142           | -16.61      |
| CSRP1   | -0.42 | 6.87   | 0.000   | 0.018 | 128.02      | 95.57      | 146           | -19.12      |
| DPP9    | -0.38 | 6.87   | 0.001   | 0.032 | 126.46      | 97.44      | 144           | -13.36      |
| E2F1    | -0.46 | 6.46   | 0.001   | 0.036 | 96.27       | 69.60      | 140           | -14.74      |
| ESYT1   | -0.43 | 7.12   | 0.000   | 0.024 | 152.89      | 113.37     | 280           | -28.46      |
| FANCI   | -0.41 | 7.03   | 0.001   | 0.045 | 143.14      | 107.43     | 145           | -19.25      |
| FLNA    | -0.57 | 7.36   | 0.000   | 0.003 | 186.09      | 125.86     | 295           | -32.3       |
| FOXRED1 | -0.63 | 5.17   | 0.001   | 0.041 | 39.02       | 25.26      | 157           | -22.06      |
| GPI     | -0.26 | 8.75   | 0.000   | 0.016 | 462.17      | 386.51     | 296           | -33.43      |
| HARS    | -0.43 | 6.75   | 0.001   | 0.048 | 117.46      | 87.61      | 437           | -56.1       |
| INTS9   | -0.47 | 6.24   | 0.001   | 0.034 | 82.03       | 59.23      | 142           | -17.5       |
| L3MBTL2 | -0.39 | 6.71   | 0.001   | 0.042 | 113.73      | 86.22      | 140           | -11.98      |
| LIG1    | -0.87 | 5.87   | 0.000   | 0.000 | 66.88       | 36.50      | 144           | -16.17      |
| MAP4K2  | -0.51 | 6.85   | 0.000   | 0.007 | 128.85      | 89.72      | 142           | -20.71      |
| MCM2    | -0.44 | 7.65   | 0.000   | 0.003 | 223.62      | 164.75     | 148           | -14.39      |
| MCM5    | -0.36 | 7.91   | 0.000   | 0.021 | 263.56      | 205.13     | 570           | -71.59      |
| MCM7    | -0.33 | 9.03   | 0.000   | 0.010 | 576.37      | 458.35     | 154           | -19.12      |
| MFSD10  | -0.57 | 5.65   | 0.001   | 0.032 | 55.28       | 37.16      | 143           | -25.1       |
| MTCH1   | -0.37 | 6.90   | 0.001   | 0.041 | 129.75      | 99.97      | 142           | -14.45      |
| MTHFD1  | -0.41 | 6.68   | 0.001   | 0.041 | 111.64      | 84.08      | 141           | -17.47      |
| MYBL2   | -0.36 | 8.74   | 0.000   | 0.002 | 473.51      | 368.08     | 291           | -34.06      |
| NADSYN1 | -0.65 | 5.81   | 0.000   | 0.007 | 62.86       | 39.31      | 286           | -45.36      |
| NOC4L   | -0.61 | 5.24   | 0.001   | 0.047 | 40.71       | 26.52      | 145           | -14.16      |
| PITRM1  | -0.46 | 6.42   | 0.001   | 0.032 | 93.34       | 68.13      | 291           | -36.51      |
| PRR12   | -0.60 | 5.28   | 0.001   | 0.043 | 42.32       | 27.81      | 146           | -13.65      |
| RPL39   | -1.77 | 4.34   | 0.000   | 0.000 | 24.71       | 7.10       | 140           | -13.57      |
| RPUSD1  | -0.47 | 6.83   | 0.000   | 0.010 | 125.30      | 90.46      | 159           | -19.81      |
| RRP1    | -0.43 | 6.68   | 0.000   | 0.016 | 112.01      | 82.57      | 301           | -36.12      |
| SAAL1   | -0.74 | 5.59   | 0.000   | 0.003 | 53.88       | 32.58      | 146           | -18.87      |
| SAPCD2  | -0.44 | 7.13   | 0.000   | 0.005 | 154.08      | 113.73     | 154           | -20.51      |
| SCRIB   | -0.55 | 6.53   | 0.000   | 0.003 | 103.40      | 70.23      | 141           | -16.73      |
| SFII    | -0.65 | 5.17   | 0.000   | 0.029 | 39.59       | 25.02      | 445           | -55.66      |
| SLCO4A1 | -0.64 | 5.07   | 0.001   | 0.044 | 36.08       | 23.03      | 302           | -47.44      |
| SNRNP25 | -0.35 | 7.18   | 0.000   | 0.024 | 156.64      | 123.29     | 142           | -16.19      |
| SNRPE   | -0.56 | 5.99   | 0.000   | 0.012 | 70.28       | 47.46      | 148           | -22.87      |
| SPRED2  | -0.44 | 6.33   | 0.001   | 0.040 | 87.49       | 63.98      | 281           | -33.66      |
| SREBF1  | -0.60 | 6.51   | 0.000   | 0.001 | 103.24      | 67.76      | 146           | -14.89      |
| SSBP4   | -0.66 | 5.38   | 0.000   | 0.013 | 45.83       | 28.71      | 140           | -14.51      |
| TBC1D1  | -0.35 | 7.69   | 0.000   | 0.007 | 226.41      | 176.95     | 432           | -48.79      |
| TBCD    | -0.56 | 5.64   | 0.001   | 0.033 | 54.23       | 37.35      | 304           | -44.06      |
| THOP1   | -0.39 | 7.46   | 0.000   | 0.029 | 192.49      | 147.18     | 300           | -42.01      |
| VAR2    | -0.67 | 5.64   | 0.000   | 0.019 | 55.89       | 35.37      | 148           | -31.45      |
| WDHD1   | -0.51 | 6.05   | 0.001   | 0.039 | 71.81       | 50.77      | 140           | -12.31      |
| ZC3H18  | -0.49 | 6.74   | 0.000   | 0.020 | 117.70      | 84.36      | 142           | -11.29      |

Genes are listed in alphabetical order. logFC indicates log fold change; logCPM, log counts per million; FDR, false discovery rate; mfe, minimal free energy

**Supplementary Table 10: Canonical miRNA-mRNA in BL and DLBCL/FL**

**Data from SU-DHL-4 / SU-DHL-6**

| CCR           | miRNA            | miRNA<br>logFC | miRNA<br>DE FDR | miRNA<br>cpm BL | miRNA<br>cpm<br>nonBL | CCR Sequence                               | Seed Hit | Position<br>Found in<br>CCR | Read<br>Count in<br>Cluster | GeneID   | Genes<br>logFC | Genes<br>DEG<br>FDR | CPM<br>control | CPM<br>sample | FC<br>corr. |
|---------------|------------------|----------------|-----------------|-----------------|-----------------------|--------------------------------------------|----------|-----------------------------|-----------------------------|----------|----------------|---------------------|----------------|---------------|-------------|
| cl_10083_chr4 | hsa-miR-4446-3p  | 2.41           | 0.000000        | 0.69            | 3.74                  | GAAATCACACTCATATATAATCCAAGGCCAGCCCTGTGGTT  | AGCCCTG  | 30                          | 12                          | SORBS2   | -1.13          | 0.00001             | 18.37          | 8.37          | -2.74       |
| cl_10803_chr5 | hsa-miR-27a-3p   | 0.86           | 0.011903        | 616.77          | 1122.55               | TCCATGTGTAATTTCTTATATACTGTGAATGTGAAAACCTA  | CTGTGAA  | 23                          | 14                          | TNPO1    | -0.36          | 0.00399             | 102.67         | 80.04         | -0.31       |
| cl_1089_chr1  | hsa-miR-3681-5p  | 5.07           | 0.000000        | 1.82            | 61.30                 | TTTAGGAGATAAGGTTCCACTAGAAAGTAGGTATATACCCC  | TCCAATA  | 16                          | 19                          | SCMH1    | -0.70          | 0.00002             | 48.40          | 29.74         | -3.56       |
| cl_11199_chr5 | hsa-miR-455-3p   | 1.26           | 0.000225        | 16.17           | 38.86                 | ATTGCTCTCAAGAGAAAGATGTGGATGGCTGGACTGCAC    | GGACTGC  | 33                          | 14                          | CCDC112  | -0.89          | 0.00000             | 17.86          | 9.64          | -1.12       |
| cl_11349_chr5 | hsa-miR-3661     | -1.44          | 0.000180        | 7.00            | 2.53                  | GGCAGCCAGCTATGTTCAAGTCCACATCAACTTCTCTATG   | CAGGTCA  | 17                          | 6                           | AFF4     | 0.58           | 0.00021             | 52.36          | 78.41         | -0.84       |
| cl_11384_chr5 | hsa-miR-33a-5p   | -1.93          | 0.000079        | 145.43          | 38.10                 | CCCTTGGAATGCACCATCTGGAGAGAGAGAGGAATGTGG    | AATGCAC  | 10                          | 10                          | PHF15    | 1.05           | 0.00000             | 54.41          | 112.96        | -2.03       |
| cl_11384_chr5 | hsa-miR-33b-5p   | -1.74          | 0.000004        | 19.73           | 5.83                  | CCCTTGGAATGCACCATCTGGAGAGAGAGAGGAATGTGG    | AATGCAC  | 10                          | 10                          | PHF15    | 1.05           | 0.00000             | 54.41          | 112.96        | -1.84       |
| cl_11423_chr5 | hsa-miR-2467-5p  | 1.46           | 0.003890        | 3.95            | 10.85                 | CAGCAGTGCAGCCTCAAAATTTTAAACAATCAGGAGTTTG   | AGCCTCA  | 11                          | 10                          | SMAD5    | -0.48          | 0.00249             | 51.53          | 36.95         | -0.70       |
| cl_11451_chr5 | hsa-miR-214-5p   | 0.92           | 0.023829        | 10.48           | 19.83                 | ACAGGCATCCTCTTCAACCTAACTGTGAAGGAGATGGTAA   | ACAGGCA  | 1                           | 14                          | KIF20A   | -1.76          | 0.00000             | 82.14          | 24.21         | -1.62       |
| cl_11451_chr5 | hsa-miR-27a-3p   | 0.86           | 0.011903        | 616.77          | 1122.55               | ACAGGCATCCTCTTCAACCTAACTGTGAAGGAGATGGTAA   | CTGTGAA  | 24                          | 14                          | KIF20A   | -1.76          | 0.00000             | 82.14          | 24.21         | -1.52       |
| cl_11583_chr5 | hsa-miR-130b-5p  | -2.01          | 0.000006        | 211.10          | 52.39                 | AAAAGAAAAAGAGTAACACGTTGCAGGAATAAAAGCAGCCT  | AAAGAGT  | 8                           | 14                          | ARHGAP26 | 0.64           | 0.00096             | 16.21          | 25.32         | -1.29       |
| cl_1163_chr1  | hsa-miR-4524a-3p | 1.13           | 0.047890        | 0.62            | 1.40                  | TTGTGAGCAGCCACGACCTTTGGTGTACCTGTCTCAGTTG   | TGTCTCA  | 31                          | 9                           | RNF220   | -0.30          | 0.02242             | 86.03          | 70.02         | -0.33       |
| cl_11746_chr5 | hsa-miR-99b-5p   | 1.08           | 0.019368        | 8109.71         | 17128.59              | TCAAGGATGTGAAACTGCTTAAACGGGTGGGGTCCAGGG    | ACGGGTG  | 25                          | 81                          | KIF4B    | -1.02          | 0.00139             | 22.36          | 11.04         | -1.10       |
| cl_11748_chr5 | hsa-miR-24-3p    | 2.33           | 0.000001        | 117.91          | 594.79                | TATTTTGGCCAGATAATCTTTGGGGGTAGAGGTGACCT     | TGAGCCA  | 6                           | 8                           | KIF4B    | -1.02          | 0.00139             | 22.36          | 11.04         | -2.38       |
| cl_11790_chr5 | hsa-miR-29b-2-5p | 1.86           | 0.000000        | 1.75            | 6.53                  | AATCCAAATCAAACTATCAAACTCCCAAAACCAAGAAGCT   | AAACCAG  | 30                          | 12                          | PWWP2A   | -0.27          | 0.03529             | 40.32          | 33.42         | -0.50       |
| cl_1196_chr1  | hsa-miR-361-5p   | 0.91           | 0.009573        | 96.05           | 180.08                | CTGATAAACTCCTTTGACCTGACGATTGCTCTAAGTCCTA   | CTGATAA  | 1                           | 16                          | NASP     | -1.68          | 0.00000             | 285.20         | 89.21         | -1.52       |
| cl_12055_chr5 | hsa-miR-125a-3p  | 1.45           | 0.000079        | 1.91            | 5.30                  | GCAAATGATGATTACCTCTACCTCCACCTGTGCTGCC      | CACCTGT  | 29                          | 23                          | RMND5B   | -0.60          | 0.00002             | 70.50          | 46.35         | -0.88       |
| cl_12055_chr5 | hsa-let-7d-5p    | 0.97           | 0.003359        | 541.68          | 1061.17               | GCAAATGATGATTACCTCTACCTCCACCTGTGCTGCC      | TACCTCT  | 13                          | 23                          | RMND5B   | -0.60          | 0.00002             | 70.50          | 46.35         | -0.59       |
| cl_12127_chr5 | hsa-miR-17-3p    | -2.96          | 0.000000        | 2176.96         | 279.17                | ATTTAAATGACATCACTGCTTCTGGGAACTGCAGTGGATGG  | CTGCAGT  | 29                          | 26                          | FLT4     | 1.78           | 0.00000             | 4.94           | 17.02         | -5.28       |
| cl_12324_chr6 | hsa-miR-374b-5p  | 2.84           | 0.000010        | 34.89           | 250.55                | CCTTCATACATAATTCAATATATGGGCCAGGAACCAACAGG  | ATTATAT  | 17                          | 7                           | NOL7     | -0.56          | 0.00014             | 118.94         | 80.91         | -1.58       |
| cl_12335_chr6 | hsa-miR-4517     | -1.60          | 0.000287        | 5.06            | 1.68                  | GGAGTCTGTACGGGGCAGCTGGGGCATTATATTTCCCA     | CATATTT  | 31                          | 18                          | CD83     | 2.00           | 0.00000             | 56.81          | 226.92        | -3.20       |
| cl_12388_chr6 | hsa-miR-17-5p    | -1.37          | 0.000088        | 1233.06         | 477.71                | TCTCACTTTGTGCCACGCTGATGTTGAACTTGACGTGAG    | CACTTTG  | 4                           | 14                          | TPMT     | 0.56           | 0.00064             | 6.09           | 8.97          | -0.77       |
| cl_12388_chr6 | hsa-miR-20b-5p   | -1.12          | 0.042021        | 59.74           | 27.49                 | TCTCACTTTGTGCCACGCTGATGTTGAACTTGACGTGAG    | CACTTTG  | 4                           | 14                          | TPMT     | 0.56           | 0.00064             | 6.09           | 8.97          | -0.63       |
| cl_12388_chr6 | hsa-miR-3609     | -2.85          | 0.000000        | 596.50          | 83.01                 | TCTCACTTTGTGCCACGCTGATGTTGAACTTGACGTGAG    | CACTTTG  | 4                           | 14                          | TPMT     | 0.56           | 0.00064             | 6.09           | 8.97          | -1.59       |
| cl_12388_chr6 | hsa-miR-93-5p    | -1.06          | 0.001859        | 2255.60         | 1081.01               | TCTCACTTTGTGCCACGCTGATGTTGAACTTGACGTGAG    | CACTTTG  | 4                           | 14                          | TPMT     | 0.56           | 0.00064             | 6.09           | 8.97          | -0.59       |
| cl_12642_chr6 | hsa-miR-573      | -2.99          | 0.000000        | 3.34            | 0.42                  | TGGGTGAAGTGACTTCAAGTAATAACAATAATGCAAAATATC | ACTTCAG  | 12                          | 43                          | NOTCH4   | 0.66           | 0.00658             | 7.87           | 12.42         | -1.97       |
| cl_12687_chr6 | hsa-miR-139-3p   | 1.51           | 0.004679        | 2.42            | 6.94                  | GAGGGTCTCAAGGCTGGATGACGAGGCCACGTTGTCTCT    | GTCTCCA  | 5                           | 17                          | ITPR3    | -0.46          | 0.00832             | 180.31         | 131.23        | -0.69       |
| cl_12723_chr6 | hsa-miR-625-5p   | -1.31          | 0.000026        | 20.75           | 8.38                  | GGCCCCGGCGGGCGCCCCCTCCCTCCCTCCTGCGAGC      | TCCCCCT  | 26                          | 10                          | SCUBE3   | 0.72           | 0.00203             | 1.97           | 3.26          | -0.95       |
| cl_12779_chr6 | hsa-miR-625-5p   | -1.31          | 0.000026        | 20.75           | 8.38                  | GCGCCCCGGCGGGCGCCCCCTCCCTCCCTCCCTGCGAGC    | TCCCCCT  | 25                          | 11                          | ZFAND3   | 0.78           | 0.00000             | 28.68          | 49.26         | -1.02       |

|               |                   |       |          |         |         |                                            |         |    |         |          |       |         |         |        |       |
|---------------|-------------------|-------|----------|---------|---------|--------------------------------------------|---------|----|---------|----------|-------|---------|---------|--------|-------|
| cl_13184_chr6 | hsa-miR-449a      | -1.36 | 0.000063 | 5.99    | 2.35    | AATCTAATTCTACAGTCCGATGATGTTACTGCCATCTCCTC  | ACTGCCA | 28 | 3145659 | RWDD2A   | 0.81  | 0.00000 | 2.64    | 4.61   | -1.10 |
| cl_13407_chr6 | hsa-miR-369-3p    | -1.14 | 0.016758 | 3.61    | 1.65    | TTATTATTTAATATAGATCTGTAACCTCGGTTCCAAGTAC   | TATTATT | 2  | 8       | FIG4     | 0.66  | 0.00006 | 22.55   | 35.61  | -0.75 |
| cl_13514_chr6 | hsa-miR-148a-5p   | 1.68  | 0.005075 | 216.10  | 693.70  | AGTACTCTCGTGAAGGAACCTTACAGGTGTCATTAAGGTTA  | GAACCTT | 16 | 12      | HSF2     | -0.77 | 0.00000 | 19.71   | 11.59  | -1.29 |
| cl_13514_chr6 | hsa-miR-425-5p    | 1.28  | 0.007710 | 562.69  | 1362.90 | AGTACTCTCGTGAAGGAACCTTACAGGTGTCATTAAGGTTA  | TGTCATT | 28 | 12      | HSF2     | -0.77 | 0.00000 | 19.71   | 11.59  | -0.98 |
| cl_13573_chr6 | hsa-miR-19a-5p    | -1.78 | 0.000041 | 24.62   | 7.20    | GAACAAAACCTCCAGGAAAATTGTCGCTGGGTGAGCTGGTG  | CAAAACT | 4  | 5       | ARHGAP18 | 0.89  | 0.00009 | 12.49   | 23.08  | -1.58 |
| cl_13573_chr6 | hsa-miR-19b-1-5p  | -1.98 | 0.000000 | 4.46    | 1.18    | GAACAAAACCTCCAGGAAAATTGTCGCTGGGTGAGCTGGTG  | CAAAACT | 4  | 5       | ARHGAP18 | 0.89  | 0.00009 | 12.49   | 23.08  | -1.76 |
| cl_13615_chr6 | hsa-miR-9-5p      | 2.02  | 0.000177 | 22.16   | 90.19   | ACCAAAGAGAGTAATAGCCTTTGCTATTGAAATATCTACAG  | CCAAAGA | 2  | 9       | TBPL1    | -0.61 | 0.00005 | 26.57   | 17.40  | -1.23 |
| cl_13725_chr6 | hsa-miR-3613-3p   | -0.59 | 0.049047 | 4.41    | 2.92    | TTTTTCTTTTTGTACAGTCTGACCATCTTTGCCTTTTGTAGT | TTTTTGT | 8  | 31      | STX11    | 1.23  | 0.00011 | 5.29    | 12.38  | -0.73 |
| cl_13739_chr6 | hsa-miR-4797-3p   | -2.18 | 0.000008 | 4.00    | 0.85    | TGGTTGAAAAGCCGGAGGACTGAGATAAATTGGTGCCATGT  | ACTGAGA | 19 | 743     | UTRN     | 1.37  | 0.00000 | 47.31   | 121.93 | -2.98 |
| cl_13766_chr6 | hsa-miR-577       | -1.72 | 0.000050 | 660.86  | 200.99  | ATTTATACCTATCTCAGTCTGGAACACTTATCTAAGACCA   | TTATCTA | 29 | 5       | STXBP5   | 0.44  | 0.00895 | 17.73   | 24.09  | -0.76 |
| cl_13905_chr6 | hsa-miR-181a-3p   | -0.96 | 0.000287 | 612.96  | 314.69  | CCGACCAGGTTACAGTCCGATGGTCATAATCCAGATGAGAG  | CGATGGT | 18 | 19      | DYNLT1   | 0.39  | 0.00974 | 10.64   | 13.91  | -0.37 |
| cl_14112_chr7 | hsa-miR-188-5p    | 0.79  | 0.036509 | 3.15    | 5.40    | TTCACTATGTAGTGAAGGGATGCAAAATTCACGGGAAATT   | AGGGATG | 16 | 5       | PRKAR1B  | -0.74 | 0.00014 | 51.78   | 31.08  | -0.58 |
| cl_14160_chr7 | hsa-miR-199a-5p   | 1.59  | 0.000007 | 181.97  | 548.37  | AGCGGAGGCTGTTCTGTTTCTTCACTGGGACTGAGACACG   | CACTGGG | 24 | 273     | MAD1L1   | -1.14 | 0.00000 | 95.37   | 43.34  | -1.81 |
| cl_14194_chr7 | hsa-miR-181a-2-3p | -1.19 | 0.000679 | 227.17  | 99.88   | CAGATATTATGCCATCCAGTGGTTCACCTCAGATAAAAAT   | CAGTGGT | 18 | 7       | SDK1     | 0.68  | 0.03704 | 10.53   | 16.82  | -0.80 |
| cl_1421_chr1  | hsa-miR-4487      | -1.24 | 0.005006 | 1.62    | 0.68    | GTAATGGCTTCATTACGCTCTGGATCTGTTCTATGATTCC   | CAGCTCT | 15 | 16      | CACHD1   | 0.92  | 0.00433 | 2.30    | 4.34   | -1.14 |
| cl_1421_chr1  | hsa-miR-376a-3p   | -2.14 | 0.000001 | 3.89    | 0.86    | GTAATGGCTTCATTACGCTCTGGATCTGTTCTATGATTCC   | CTATGAT | 32 | 16      | CACHD1   | 0.92  | 0.00433 | 2.30    | 4.34   | -1.97 |
| cl_14245_chr7 | hsa-miR-92b-5p    | 0.98  | 0.008992 | 0.54    | 1.12    | TCCTCAGAACCTCCACGCCTTCTCATCTCCGTCCTGGCA    | CGTCCCT | 31 | 23      | FBXL18   | -0.68 | 0.00001 | 16.68   | 10.39  | -0.67 |
| cl_14245_chr7 | hsa-miR-5091      | 1.47  | 0.006360 | 2.44    | 6.77    | TCCTCAGAACCTCCACGCCTTCTCATCTCCGTCCTGGCA    | TCTCCGT | 27 | 23      | FBXL18   | -0.68 | 0.00001 | 16.68   | 10.39  | -1.00 |
| cl_14298_chr7 | hsa-miR-625-3p    | -0.95 | 0.012667 | 40.61   | 21.02   | AAACTATAGTCACAAATTAATAGGTAGCAGTATCGAGTTT   | TATAGTC | 5  | 7       | ICA1     | 2.57  | 0.00000 | 3.59    | 21.29  | -2.43 |
| cl_14315_chr7 | hsa-miR-10b-3p    | 3.02  | 0.000000 | 1.45    | 11.98   | AGAAATCCCTGTGAATCTGTCAGGCTCTGGGCTTTTTGG    | AATCTGT | 15 | 9       | NDUFA4   | -0.40 | 0.00520 | 42.52   | 32.28  | -1.20 |
| cl_14315_chr7 | hsa-miR-659-5p    | 1.29  | 0.000787 | 2.67    | 6.44    | AGAAATCCCTGTGAATCTGTCAGGCTCTGGGCTTTTTGG    | AGGTCCT | 23 | 9       | NDUFA4   | -0.40 | 0.00520 | 42.52   | 32.28  | -0.51 |
| cl_14315_chr7 | hsa-miR-27a-3p    | 0.86  | 0.011903 | 616.77  | 1122.55 | AGAAATCCCTGTGAATCTGTCAGGCTCTGGGCTTTTTGG    | CTGTGAA | 10 | 9       | NDUFA4   | -0.40 | 0.00520 | 42.52   | 32.28  | -0.34 |
| cl_14458_chr7 | hsa-miR-484       | -1.26 | 0.000040 | 1404.88 | 587.88  | TTACCAAGATTCTTACGCCTGACGATCCTGTCTAGCTTTC   | AGCCTGA | 17 | 17      | OSBPL3   | 0.62  | 0.01100 | 57.76   | 88.93  | -0.78 |
| cl_14708_chr7 | hsa-miR-378a-3p   | -1.54 | 0.000000 | 2405.55 | 827.87  | ATCACTTGAGCCAGAGGTTTGAGTCCAGTCTGGGCAACAC   | GTCCAGT | 24 | 11      | CAMK2B   | 2.59  | 0.00185 | 1.99    | 11.97  | -3.99 |
| cl_14708_chr7 | hsa-miR-378c      | -1.27 | 0.000000 | 300.43  | 124.57  | ATCACTTGAGCCAGAGGTTTGAGTCCAGTCTGGGCAACAC   | GTCCAGT | 24 | 11      | CAMK2B   | 2.59  | 0.00185 | 1.99    | 11.97  | -3.29 |
| cl_14708_chr7 | hsa-miR-378d      | -1.10 | 0.003182 | 14.73   | 6.83    | ATCACTTGAGCCAGAGGTTTGAGTCCAGTCTGGGCAACAC   | GTCCAGT | 24 | 11      | CAMK2B   | 2.59  | 0.00185 | 1.99    | 11.97  | -2.85 |
| cl_14708_chr7 | hsa-miR-378i      | -2.12 | 0.000031 | 7.69    | 1.78    | ATCACTTGAGCCAGAGGTTTGAGTCCAGTCTGGGCAACAC   | GTCCAGT | 24 | 11      | CAMK2B   | 2.59  | 0.00185 | 1.99    | 11.97  | -5.50 |
| cl_1475_chr1  | hsa-miR-140-3p    | 0.74  | 0.009811 | 2206.05 | 3679.70 | TGCTGTGTATGCAGTCCGATGATCGGTCCTGTGGTAAGG    | TGTGGTA | 32 | 9       | LRRC7    | -0.73 | 0.00000 | 26.92   | 16.18  | -0.54 |
| cl_15361_chr7 | hsa-miR-130b-3p   | -2.24 | 0.000000 | 701.16  | 148.59  | GGGCACACTCCATTATGCAGTGATTGCAATCTTAAATGG    | TGCACTG | 16 | 7       | DOCK4    | 0.60  | 0.02029 | 12.21   | 18.50  | -1.34 |
| cl_15361_chr7 | hsa-miR-301a-3p   | -0.65 | 0.023052 | 241.53  | 153.73  | GGGCACACTCCATTATGCAGTGATTGCAATCTTAAATGG    | TGCACTG | 16 | 7       | DOCK4    | 0.60  | 0.02029 | 12.21   | 18.50  | -0.39 |
| cl_15423_chr7 | hsa-miR-449a      | -1.36 | 0.000063 | 5.99    | 2.35    | TCGCACTGCCAGTTTGATTTTTAAGTCAGAATCTGGCTAT   | ACTGCCA | 5  | 24      | CADPS2   | 0.59  | 0.00610 | 5.62    | 8.47   | -0.80 |
| cl_15423_chr7 | hsa-miR-4755-3p   | -1.99 | 0.000050 | 2.99    | 0.74    | TCGCACTGCCAGTTTGATTTTTAAGTCAGAATCTGGCTAT   | CCTGGCT | 33 | 24      | CADPS2   | 0.59  | 0.00610 | 5.62    | 8.47   | -1.18 |
| cl_15553_chr7 | hsa-miR-188-5p    | 0.79  | 0.036509 | 3.15    | 5.40    | GTTTAATTGGCTTTATCTCTGAGGGATGAGACTTTCTAT    | AGGGATG | 23 | 7       | CHCHD3   | -0.63 | 0.00003 | 1483.24 | 956.50 | -0.50 |
| cl_155_chr1   | hsa-miR-138-5p    | 1.70  | 0.013928 | 24.26   | 78.83   | CCTGGAGGACCAGCTCCCCTGGGGAGTACGGCCTCAAGC    | ACCAGCT | 9  | 40      | ISG15    | -1.15 | 0.00040 | 29.93   | 13.50  | -1.95 |
| cl_155_chr1   | hsa-miR-361-3p    | 1.24  | 0.003876 | 615.76  | 1454.95 | CCTGGAGGACCAGCTCCCCTGGGGAGTACGGCCTCAAGC    | TGGGGGA | 21 | 40      | ISG15    | -1.15 | 0.00040 | 29.93   | 13.50  | -1.42 |

|                |                   |       |          |          |           |                                            |         |    |       |          |       |         |        |        |       |
|----------------|-------------------|-------|----------|----------|-----------|--------------------------------------------|---------|----|-------|----------|-------|---------|--------|--------|-------|
| cl_15608_chr7  | hsa-miR-2110      | 1.05  | 0.000723 | 2.94     | 6.19      | ATTCACCTCCCAAAATGCTGTAACCTCGACTCCTTGATTTTC | TCCCCAA | 7  | 26    | DGKI     | -0.68 | 0.00000 | 401.20 | 251.04 | -0.71 |
| cl_15639_chr7  | hsa-miR-3661      | -1.44 | 0.000180 | 7.00     | 2.53      | AAGCTAGAGTATGGAAGGGGTAGGATTTGAAACACAGGTCAT | CAGGTCA | 34 | 18    | TBXAS1   | 0.77  | 0.00032 | 11.42  | 19.48  | -1.11 |
| cl_15664_chr7  | hsa-miR-3651      | -2.34 | 0.000028 | 4.24     | 0.82      | GGGCTATGAAGTGGAGCCTGTGGCTCGGAAATCACCTTTC   | GGCTATG | 2  | 10    | KIAA1147 | 0.90  | 0.00000 | 28.55  | 53.14  | -2.10 |
| cl_15708_chr7  | hsa-miR-92a-1-5p  | -1.14 | 0.012809 | 38.34    | 17.48     | GTCCTAAGACCAACCTTTGATCATCTGTGGGCTCATGACTG  | CCAACCT | 10 | 6     | TPK1     | 0.65  | 0.00069 | 6.02   | 9.43   | -0.74 |
| cl_1588_chr1   | hsa-miR-589-3p    | -1.73 | 0.000002 | 17.95    | 5.34      | GTCCAGGCAAAGTTCTGAAGTGGCCCCCTCGCCCTCACG    | GTTCTGA | 12 | 12    | CYR61    | 0.85  | 0.03335 | 29.67  | 53.46  | -1.47 |
| cl_1603_chr1   | hsa-miR-101-5p    | 1.15  | 0.002105 | 4.96     | 11.04     | TACTGGCCAGGGTAGACTAATAACTGATGGCATTATATGC   | ATAACTG | 20 | 19    | HS2ST1   | -0.60 | 0.00045 | 127.84 | 84.23  | -0.69 |
| cl_1603_chr1   | hsa-miR-10b-5p    | 1.65  | 0.000237 | 64964.70 | 203496.95 | TACTGGCCAGGGTAGACTAATAACTGATGGCATTATATGC   | CAGGGTA | 8  | 19    | HS2ST1   | -0.60 | 0.00045 | 127.84 | 84.23  | -0.99 |
| cl_16404_chr8  | hsa-miR-10b-5p    | 1.65  | 0.000237 | 64964.70 | 203496.95 | ACTAGTTGGCAGGGTAAAGGTAATCCATTGTAGCAACTGGG  | CAGGGTA | 10 | 28    | UNC5D    | -0.52 | 0.00004 | 24.51  | 17.11  | -0.85 |
| cl_16404_chr8  | hsa-miR-708-3p    | 0.98  | 0.026809 | 18.72    | 36.79     | ACTAGTTGGCAGGGTAAAGGTAATCCATTGTAGCAACTGGG  | CTAGTTG | 2  | 28    | UNC5D    | -0.52 | 0.00004 | 24.51  | 17.11  | -0.51 |
| cl_16780_chr8  | hsa-miR-589-3p    | -1.73 | 0.000002 | 17.95    | 5.34      | ATCGAGGTTCTGAACAGCGGTGCCAAGGAATCGAGTAATTT  | GTTCTGA | 7  | 8     | TRAM1    | 0.47  | 0.00489 | 127.90 | 176.70 | -0.81 |
| cl_16903_chr8  | hsa-miR-221-5p    | 1.18  | 0.015984 | 188.23   | 426.85    | CTCCCCGCTCTCCAAAACCTACCTGCCGAAGTCCAGGTT    | GCCAGGT | 34 | 20    | LRRCC1   | -0.91 | 0.00000 | 30.25  | 16.08  | -1.08 |
| cl_17087_chr8  | hsa-miR-155-5p    | 3.25  | 0.000000 | 1152.30  | 10989.11  | TTTTGCATTAACAGGAAGTGGAAATGACTTGTGGCTGGAT   | GCATTAA | 5  | 37    | ZNF706   | -0.33 | 0.02365 | 66.99  | 53.22  | -1.08 |
| cl_17121_chr8  | hsa-miR-127-5p    | -1.65 | 0.000512 | 10.82    | 3.43      | GTGAAGGTGACTGGCTCAGTGAAGGTGCGCAGTGGTGT     | GCTTCAG | 14 | 24    | ZFPM2    | 0.94  | 0.00126 | 2.86   | 5.50   | -1.56 |
| cl_17229_chr8  | hsa-miR-543       | -2.84 | 0.000000 | 7.68     | 1.04      | CAAACAATGTTGACTGGGCTGGTGCCTAATCAGTGAAGC    | AATGTTT | 6  | 13    | HAS2     | 0.93  | 0.00251 | 1.83   | 3.48   | -2.63 |
| cl_17378_chr8  | hsa-miR-181a-2-3p | -1.19 | 0.000679 | 227.17   | 99.88     | GCGGTATAAGAAACCTCAGTGGTGTATCAGTCAGCTTTC    | CAGTGGT | 18 | 72    | ST3GAL1  | 1.01  | 0.00000 | 29.05  | 58.53  | -1.20 |
| cl_17581_chr8  | hsa-miR-3194-5p   | -1.19 | 0.004724 | 6.37     | 2.74      | TGTCCCCCTGCGTGCCTCTGCAGCTGGCCACAGTGGCT     | GCTGGCC | 25 | 10    | MAPK15   | 3.94  | 0.00000 | 0.34   | 5.23   | -4.70 |
| cl_17581_chr8  | hsa-miR-625-5p    | -1.31 | 0.000026 | 20.75    | 8.38      | TGTCCCCCTGCGTGCCTCTGCAGCTGGCCACAGTGGCT     | TCCCCCT | 3  | 10    | MAPK15   | 3.94  | 0.00000 | 0.34   | 5.23   | -5.15 |
| cl_17821_chr9  | hsa-miR-379-3p    | -2.39 | 0.000004 | 3.13     | 0.58      | TGTGGAAGGCACAGACAATTACATATCTGTTGAATGCCTT   | TTACATA | 20 | 9     | ADAMTSL1 | 0.62  | 0.03078 | 3.02   | 4.63   | -1.47 |
| cl_17852_chr9  | hsa-miR-3622a-5p  | 3.06  | 0.000010 | 0.23     | 1.89      | GTGTCAACTGTGCTGACTGTGTAGAGACTTATAAAAG      | GTGCCTG | 10 | 16    | MTAP     | -1.49 | 0.00000 | 65.56  | 23.28  | -4.57 |
| cl_18032_chr9  | hsa-miR-3613-3p   | -0.59 | 0.049047 | 4.41     | 2.92      | GACTCGGAGAAAGTCCACCTTTTGTCTATGCAGGCCCTT    | TTTTTGT | 21 | 15    | SHB      | 0.49  | 0.04647 | 3.43   | 4.81   | -0.29 |
| cl_18144_chr9  | hsa-miR-103a-2-5p | -1.50 | 0.000002 | 5.75     | 2.00      | GCAGGACGATCGTAAAGTCTGATATTGGGAAAGAAGCTCA   | AGAAGCT | 33 | 16    | PCSK5    | 0.68  | 0.04373 | 3.84   | 6.17   | -1.02 |
| cl_1818_chr1   | hsa-miR-15b-3p    | -0.95 | 0.002065 | 65.01    | 33.63     | AGCAATGTTGTCATGGTTCCTCTATAGTATTCTGATGAAG   | TGATTCG | 28 | 10    | NTNG1    | 1.17  | 0.02029 | 2.38   | 5.34   | -1.11 |
| cl_1819_chr1   | hsa-miR-296-5p    | -1.00 | 0.001384 | 13.99    | 7.04      | TATACACAGTGATTAAGGTTTTGGGGCCCTAATAAATTC    | GGGCCCT | 25 | 5290  | NTNG1    | 1.17  | 0.02029 | 2.38   | 5.34   | -1.16 |
| cl_1830_chr1   | hsa-miR-4687-5p   | -0.90 | 0.006179 | 2.46     | 1.27      | TGAGTCTGAAGCCAGGGCTGGGCCGGCAGAGCCGCCG      | AGGGCTG | 16 | 22929 | VAV3     | 1.48  | 0.00000 | 12.77  | 35.63  | -1.33 |
| cl_18911_chr9  | hsa-miR-130b-3p   | -2.24 | 0.000000 | 701.16   | 148.59    | GGCCCTGGGCTGCAGTATGCAGTGGATCAGTGCCCTC      | TGCACTG | 21 | 12    | RAPGEF1  | 0.61  | 0.00010 | 179.93 | 274.39 | -1.36 |
| cl_18911_chr9  | hsa-miR-301a-3p   | -0.65 | 0.023052 | 241.53   | 153.73    | GGCCCTGGGCTGCAGTATGCAGTGGATCAGTGCCCTC      | TGCACTG | 21 | 12    | RAPGEF1  | 0.61  | 0.00010 | 179.93 | 274.39 | -0.40 |
| cl_18920_chr9  | hsa-miR-1304-3p   | -1.38 | 0.000040 | 25.27    | 9.67      | GAGGCCCGGGCCAGGGAGTGAGACCCTTGCTTCTGACTT    | AGTGAGA | 19 | 33    | NTNG2    | 1.18  | 0.00012 | 3.25   | 7.38   | -1.64 |
| cl_18923_chr9  | hsa-miR-4677-3p   | 2.36  | 0.000008 | 6.84     | 35.21     | AGTTGGTGATCACAGATTTTCTCAGGATATCTGTCGGTG    | TCACAGA | 10 | 10    | TTF1     | -0.35 | 0.01097 | 22.60  | 17.68  | -0.84 |
| cl_19201_chr10 | hsa-miR-188-5p    | 0.79  | 0.036509 | 3.15     | 5.40      | CCAGCCGTTCCGCTCGTTGCTTTCCAGGGATGTTGTGAGT   | AGGGATG | 27 | 8     | DIP2C    | -2.09 | 0.00000 | 64.22  | 15.09  | -1.65 |
| cl_19276_chr10 | hsa-miR-155-3p    | 1.63  | 0.003876 | 0.57     | 1.82      | AGGCAGGCAGGACTCAGCGTATGGTAGGAGTCACTGGAG    | GTAGGAG | 26 | 6     | CALML3   | -1.03 | 0.00496 | 2.45   | 1.20   | -1.67 |
| cl_19459_chr10 | hsa-miR-27a-5p    | 0.94  | 0.010984 | 14.83    | 28.56     | AGGTGCTCTCGCACGAACACTTTAGACCAAGCCCTTCTCTC  | AAGCCCT | 29 | 10    | CACNB2   | -0.93 | 0.00005 | 11.79  | 6.18   | -0.88 |
| cl_1958_chr1   | hsa-miR-411-5p    | -1.33 | 0.024549 | 47.59    | 18.90     | AGGATTCCTTACGCTCTACTATAGCTGTGTTACTGTGCC    | TCTACTA | 16 | 7     | IGSF3    | 2.54  | 0.00001 | 2.08   | 12.10  | -3.38 |
| cl_19610_chr10 | hsa-miR-103a-2-5p | -1.50 | 0.000002 | 5.75     | 2.00      | CACTGCTACTGGAGAAGCTTTGGGGAGCTGGCAAACCTCTGA | AGAAGCT | 13 | 33    | ARHGAP12 | 0.65  | 0.00001 | 17.42  | 27.39  | -0.98 |
| cl_20300_chr10 | hsa-miR-361-3p    | 1.24  | 0.003876 | 615.76   | 1454.95   | GCATGGGGGAAACAGTCCCATGATCCAATCACCTCCCATCA  | TGGGGGA | 4  | 20    | ALDH18A1 | -0.70 | 0.00001 | 99.05  | 60.80  | -0.87 |
| cl_20364_chr10 | hsa-miR-30a-3p    | 0.99  | 0.025009 | 59.24    | 117.52    | TGGGTAACCACTGAAAGCAATTAAGCAAGAGAGTAACATGA  | CTGAAAG | 11 | 12    | GOT1     | -0.46 | 0.00157 | 30.97  | 22.49  | -0.46 |



|                |                   |       |          |         |          |                                           |         |    |    |          |       |         |        |        |       |
|----------------|-------------------|-------|----------|---------|----------|-------------------------------------------|---------|----|----|----------|-------|---------|--------|--------|-------|
| cl_20484_chr10 | hsa-miR-4687-5p   | -0.90 | 0.006179 | 2.46    | 1.27     | AAACTTGAGAAGGCTGTCTTATCCCCTCATTTACGCT     | AGGGCTG | 11 | 78 | SORCS1   | 1.58  | 0.00001 | 1.61   | 4.81   | -1.42 |
| cl_20541_chr10 | hsa-miR-449a      | -1.36 | 0.000063 | 5.99    | 2.35     | CTTTGTGGGAAGGTTCCCTTTGCACTGCCATGGAAGGCTG  | ACTGCCA | 25 | 15 | TCF7L2   | 0.59  | 0.00878 | 6.18   | 9.27   | -0.80 |
| cl_20541_chr10 | hsa-miR-3667-3p   | -1.36 | 0.008075 | 1.56    | 0.64     | CTTTGTGGGAAGGTTCCCTTTGCACTGCCATGGAAGGCTG  | GGAAGGT | 9  | 15 | TCF7L2   | 0.59  | 0.00878 | 6.18   | 9.27   | -0.79 |
| cl_20541_chr10 | hsa-miR-130b-3p   | -2.24 | 0.000000 | 701.16  | 148.59   | CTTTGTGGGAAGGTTCCCTTTGCACTGCCATGGAAGGCTG  | TGCACTG | 22 | 15 | TCF7L2   | 0.59  | 0.00878 | 6.18   | 9.27   | -1.31 |
| cl_20541_chr10 | hsa-miR-301a-3p   | -0.65 | 0.023052 | 241.53  | 153.73   | CTTTGTGGGAAGGTTCCCTTTGCACTGCCATGGAAGGCTG  | TGCACTG | 22 | 15 | TCF7L2   | 0.59  | 0.00878 | 6.18   | 9.27   | -0.38 |
| cl_20754_chr10 | hsa-miR-27a-5p    | 0.94  | 0.010984 | 14.83   | 28.56    | AAGCCCTTGATAAACCCTGCCCCGCTCCGCTCATC       | AAGCCCT | 1  | 5  | UROS     | -0.35 | 0.00715 | 47.26  | 37.13  | -0.33 |
| cl_2096_chr1   | hsa-miR-16-5p     | 1.05  | 0.011450 | 5367.05 | 11108.90 | GGTCTCTTGATCCAGATGCTGCTAGGGGGGAAAAAAAAC   | GCTGCTA | 19 | 14 | PIP5K1A  | -0.30 | 0.03879 | 48.23  | 39.29  | -0.31 |
| cl_2096_chr1   | hsa-miR-195-5p    | 0.98  | 0.008752 | 364.88  | 722.27   | GGTCTCTTGATCCAGATGCTGCTAGGGGGGAAAAAAAAC   | GCTGCTA | 19 | 14 | PIP5K1A  | -0.30 | 0.03879 | 48.23  | 39.29  | -0.29 |
| cl_21098_chr11 | hsa-miR-424-5p    | -1.81 | 0.000003 | 177.32  | 50.51    | TCAGCACCTGCTGATACAACTGAAGCTGCTGATGTGCCCC  | GCTGCTG | 25 | 8  | FAM160A2 | 0.47  | 0.00159 | 22.39  | 31.01  | -0.85 |
| cl_21169_chr11 | hsa-miR-17-5p     | -1.37 | 0.000088 | 1233.06 | 477.71   | TCTCCACACTTTGATGTGAATGGAGGTAGGAACCCACAATA | CACCTTG | 7  | 16 | SBF2     | 0.44  | 0.00246 | 34.30  | 46.62  | -0.61 |
| cl_21169_chr11 | hsa-miR-20b-5p    | -1.12 | 0.042021 | 59.74   | 27.49    | TCTCCACACTTTGATGTGAATGGAGGTAGGAACCCACAATA | CACCTTG | 7  | 16 | SBF2     | 0.44  | 0.00246 | 34.30  | 46.62  | -0.49 |
| cl_21169_chr11 | hsa-miR-3609      | -2.85 | 0.000000 | 596.50  | 83.01    | TCTCCACACTTTGATGTGAATGGAGGTAGGAACCCACAATA | CACCTTG | 7  | 16 | SBF2     | 0.44  | 0.00246 | 34.30  | 46.62  | -1.26 |
| cl_21169_chr11 | hsa-miR-93-5p     | -1.06 | 0.001859 | 2255.60 | 1081.01  | TCTCCACACTTTGATGTGAATGGAGGTAGGAACCCACAATA | CACCTTG | 7  | 16 | SBF2     | 0.44  | 0.00246 | 34.30  | 46.62  | -0.47 |
| cl_21249_chr11 | hsa-miR-3922-3p   | 1.24  | 0.017898 | 0.75    | 1.82     | ATCTCCAATAAAATTGAGATGGCCAGACTGAAACACTT    | GGCCAGA | 23 | 5  | SOX6     | -0.74 | 0.00000 | 32.59  | 19.46  | -0.92 |
| cl_22132_chr11 | hsa-miR-4755-3p   | -1.99 | 0.000050 | 2.99    | 0.74     | CAAGGCTGGGGTCTGGGTTTGAATCTGGCTTGAGCTTC    | CCTGGCT | 26 | 23 | LRRC32   | 2.50  | 0.00003 | 7.58   | 42.88  | -4.97 |
| cl_2246_chr1   | hsa-miR-708-5p    | 1.88  | 0.000003 | 14.78   | 54.47    | TGCTGAGGGTAAAGCTCCTTTGACCAGGGGGCAAAAAAAA  | GCTCCTT | 14 | 5  | MEF2D    | -0.60 | 0.00036 | 100.65 | 66.27  | -1.13 |
| cl_22502_chr11 | hsa-miR-3648      | -1.65 | 0.002386 | 7.08    | 2.27     | GGGGCGGGGAGGTCGCGGCTCGGGTGGTCCGCCGCACGG   | CGCGGCT | 15 | 18 | NCAM1    | 1.32  | 0.01354 | 2.60   | 6.52   | -2.18 |
| cl_22662_chr11 | hsa-miR-149-5p    | -1.00 | 0.003123 | 13.82   | 6.89     | TTGAGCCAGAATCTCACTCTGTCAACCAGGCTGGAGTACA  | AGCCAGA | 4  | 12 | THY1     | 0.80  | 0.01446 | 45.69  | 79.40  | -0.80 |
| cl_22662_chr11 | hsa-miR-1254      | -1.46 | 0.000090 | 5.06    | 1.83     | TTGAGCCAGAATCTCACTCTGTCAACCAGGCTGGAGTACA  | CCAGGCT | 27 | 12 | THY1     | 0.80  | 0.01446 | 45.69  | 79.40  | -1.16 |
| cl_22742_chr11 | hsa-miR-181a-2-3p | -1.19 | 0.000679 | 227.17  | 99.88    | CAATTATATTTCTCTGGGCTGTAGGTCAAGTGAATGT     | CAGTGGT | 30 | 11 | SIAE     | 0.57  | 0.00183 | 14.21  | 21.07  | -0.67 |
| cl_22762_chr11 | hsa-miR-204-5p    | -1.38 | 0.014138 | 67.02   | 25.73    | GGAATCCCTCTTGACATCTAATGTAGTAAAGGAATAAT    | AAGGGAA | 31 | 42 | FEZ1     | 2.70  | 0.00000 | 3.26   | 21.14  | -3.72 |
| cl_22884_chr11 | hsa-miR-4645-3p   | 0.66  | 0.038686 | 3.63    | 5.68     | TGTTCCCACTTCTACTGCTGATGTTCAAATAGCTCAGAA   | ACTGTCT | 15 | 5  | NCAPD3   | -0.62 | 0.00291 | 114.08 | 74.19  | -0.41 |
| cl_22884_chr11 | hsa-miR-199a-3p   | 0.65  | 0.033491 | 809.01  | 1268.66  | TGTTCCCACTTCTACTGCTGATGTTCAAATAGCTCAGAA   | CTACTGT | 13 | 5  | NCAPD3   | -0.62 | 0.00291 | 114.08 | 74.19  | -0.40 |
| cl_22884_chr11 | hsa-miR-199b-3p   | 0.65  | 0.033410 | 807.77  | 1267.49  | TGTTCCCACTTCTACTGCTGATGTTCAAATAGCTCAGAA   | CTACTGT | 13 | 5  | NCAPD3   | -0.62 | 0.00291 | 114.08 | 74.19  | -0.40 |
| cl_22970_chr12 | hsa-let-7d-5p     | 0.97  | 0.003359 | 541.68  | 1061.17  | TCCAGGAATCTTAGCAACTACCTCTTAATTAGCAAAAAGC  | TACCTCT | 21 | 23 | EFCAB4B  | -0.41 | 0.00478 | 38.12  | 28.59  | -0.40 |
| cl_23139_chr12 | hsa-miR-296-3p    | -1.98 | 0.000000 | 6.56    | 1.66     | GAAATGTTTTAACCTCTGATGCTGAGGCAAGAAGGCTGAG  | AACCCTC | 11 | 10 | GRIN2B   | 0.80  | 0.01029 | 1.19   | 2.07   | -1.59 |
| cl_23302_chr12 | hsa-miR-200c-3p   | 3.71  | 0.000013 | 13.86   | 181.49   | TATCTGCCTAGTACCAGTATTAGTGAGACTGTGGATTTAT  | AGTATTA | 16 | 20 | FGD4     | -1.20 | 0.00002 | 15.56  | 6.79   | -4.44 |
| cl_23302_chr12 | hsa-miR-150-3p    | 3.38  | 0.000000 | 3.49    | 36.47    | TATCTGCCTAGTACCAGTATTAGTGAGACTGTGGATTTAT  | GTACCAG | 11 | 20 | FGD4     | -1.20 | 0.00002 | 15.56  | 6.79   | -4.04 |
| cl_23361_chr12 | hsa-miR-17-5p     | -1.37 | 0.000088 | 1233.06 | 477.71   | GTCTCAAAAAGAATCACACTTTGTAGGGTAAGTTCCGAAC  | CACCTTG | 18 | 28 | CNTN1    | 1.42  | 0.00009 | 1.68   | 4.48   | -1.94 |
| cl_23361_chr12 | hsa-miR-20b-5p    | -1.12 | 0.042021 | 59.74   | 27.49    | GTCTCAAAAAGAATCACACTTTGTAGGGTAAGTTCCGAAC  | CACCTTG | 18 | 28 | CNTN1    | 1.42  | 0.00009 | 1.68   | 4.48   | -1.58 |
| cl_23361_chr12 | hsa-miR-3609      | -2.85 | 0.000000 | 596.50  | 83.01    | GTCTCAAAAAGAATCACACTTTGTAGGGTAAGTTCCGAAC  | CACCTTG | 18 | 28 | CNTN1    | 1.42  | 0.00009 | 1.68   | 4.48   | -4.03 |
| cl_23361_chr12 | hsa-miR-93-5p     | -1.06 | 0.001859 | 2255.60 | 1081.01  | GTCTCAAAAAGAATCACACTTTGTAGGGTAAGTTCCGAAC  | CACCTTG | 18 | 28 | CNTN1    | 1.42  | 0.00009 | 1.68   | 4.48   | -1.50 |
| cl_23587_chr12 | hsa-miR-432-5p    | -1.20 | 0.006297 | 9.90    | 4.31     | AGTTGAGGTCCAAGAATGCATTGGTACCACGCTCCAGGGA  | TCCAAGA | 9  | 56 | SMUG1    | 0.42  | 0.00418 | 17.07  | 22.84  | -0.50 |
| cl_23643_chr12 | hsa-miR-766-3p    | 0.67  | 0.048792 | 39.23   | 62.52    | AGCCTGTTGGGTGCTGGAGTAGCTGGACCCTTTGGGGA    | CTGGAGT | 15 | 10 | NACA     | -0.82 | 0.00000 | 404.16 | 229.62 | -0.55 |
| cl_23682_chr12 | hsa-miR-4420      | -2.03 | 0.000161 | 9.58    | 2.34     | CAGTGACATGGGCAACCGTTTCTCGAAATGACACAGCACT  | CAGTGAC | 1  | 12 | LRIG3    | 1.17  | 0.00027 | 2.88   | 6.49   | -2.38 |

|                |                   |       |          |           |          |                                            |         |    |     |         |       |         |         |         |       |
|----------------|-------------------|-------|----------|-----------|----------|--------------------------------------------|---------|----|-----|---------|-------|---------|---------|---------|-------|
| cl_2370_chr1   | hsa-miR-204-5p    | -1.38 | 0.014138 | 67.02     | 25.73    | ATAATGTACGTAAGGGAAGTTTTTATTAATAATGTCTCTAGA | AAGGGAA | 12 | 5   | ATF6    | 0.35  | 0.01572 | 36.99   | 47.22   | -0.49 |
| cl_23786_chr12 | hsa-miR-708-3p    | 0.98  | 0.026809 | 18.72     | 36.79    | TGACCAATCGTACTGTCAATTGATGTCCACTAGTTGTTAAT  | CTAGTTG | 30 | 126 | CCT2    | -1.17 | 0.00000 | 389.18  | 172.41  | -1.15 |
| cl_23786_chr12 | hsa-miR-3681-5p   | 5.07  | 0.000000 | 1.82      | 61.30    | TGACCAATCGTACTGTCAATTGATGTCCACTAGTTGTTAAT  | TCCACTA | 26 | 126 | CCT2    | -1.17 | 0.00000 | 389.18  | 172.41  | -5.96 |
| cl_23879_chr12 | hsa-miR-3667-3p   | -1.36 | 0.008075 | 1.56      | 0.64     | CAAGAAATGATCTCCATACGTAGGAAGGTAGTCTACTGGA   | GGAAGGT | 23 | 11  | PPFIA2  | 0.91  | 0.00697 | 1.11    | 2.08    | -1.23 |
| cl_24133_chr12 | hsa-miR-3691-5p   | -1.17 | 0.000276 | 7.92      | 3.54     | ATAGTAGATCCACTTGATCATTCCCATTACTCTGAGCTTTT  | ATCCACT | 8  | 24  | CMKLR1  | 0.83  | 0.00790 | 21.60   | 38.45   | -0.97 |
| cl_24138_chr12 | hsa-miR-4999-5p   | 1.47  | 0.000026 | 0.45      | 1.31     | CTCTGTCTTCTTCTTCTATAGGTGTTACAGGTACAGCACT   | TACAGCA | 33 | 22  | SART3   | -0.30 | 0.02347 | 107.01  | 86.97   | -0.44 |
| cl_24245_chr12 | hsa-miR-222-5p    | 2.42  | 0.000036 | 0.56      | 3.04     | ATAGAGGCTGCTTGGAGAGCTGACTGAGGACTCTGCTAAG   | TACTGAG | 23 | 9   | DTX1    | -1.04 | 0.00004 | 254.75  | 124.22  | -2.51 |
| cl_24290_chr12 | hsa-miR-204-5p    | -1.38 | 0.014138 | 67.02     | 25.73    | TATCATTGGTCAAACCAACTGAAAGCCGGGGTAAGGGAAC   | AAGGGAA | 34 | 7   | TBX3    | 1.03  | 0.00123 | 1.62    | 3.31    | -1.42 |
| cl_24447_chr12 | hsa-miR-431-5p    | -1.83 | 0.000093 | 8.66      | 2.42     | CCGGGAGGAAGTCTAACCTTTGGGAGACTCCAAGACAGCAG  | CAAGACA | 31 | 17  | RILPL2  | 0.84  | 0.00033 | 19.01   | 34.08   | -1.54 |
| cl_24447_chr12 | hsa-miR-432-5p    | -1.20 | 0.006297 | 9.90      | 4.31     | CCGGGAGGAAGTCTAACCTTTGGGAGACTCCAAGACAGCAG  | TCCAAGA | 29 | 17  | RILPL2  | 0.84  | 0.00033 | 19.01   | 34.08   | -1.01 |
| cl_2446_chr1   | hsa-miR-27b-5p    | -0.99 | 0.003393 | 21.19     | 10.62    | GAATGAAGCTCTGTCTCAAAAACAAAAAAGTGTAAATA     | AAGCTCT | 6  | 64  | GPR161  | 1.35  | 0.00762 | 1.58    | 4.01    | -1.33 |
| cl_24652_chr12 | hsa-miR-221-5p    | 1.18  | 0.015984 | 188.23    | 426.85   | ATCAGCCGGCACCTGCCAGGTGAGTGTGCGCGGGGGCCT    | GCCAGGT | 15 | 21  | PGAM5   | -1.13 | 0.00000 | 66.85   | 30.46   | -1.34 |
| cl_24996_chr13 | hsa-miR-548s      | 1.29  | 0.011693 | 0.70      | 1.77     | AGAAATCCACATGTGTGGACTGGCCATTCTTACAGAGGAGA  | TGGCCAT | 21 | 14  | SUCLA2  | -0.62 | 0.00000 | 32.98   | 21.47   | -0.80 |
| cl_25135_chr13 | hsa-let-7d-5p     | 0.97  | 0.003359 | 541.68    | 1061.17  | TGATTAGGAAAGTCTACCTCTGACGATCTTAGAAACCTGAA  | TACCTCT | 15 | 9   | PCDH9   | -1.94 | 0.00004 | 56.58   | 14.70   | -1.89 |
| cl_25977_chr14 | hsa-miR-4524a-3p  | 1.13  | 0.047890 | 0.62      | 1.40     | ATTTATACCTCTTCTAAAGAAGTGTGTCTCAATATGTTT    | TGTCTCA | 27 | 72  | SLC35F4 | -0.71 | 0.00000 | 8.24    | 5.03    | -0.80 |
| cl_26537_chr14 | hsa-miR-181a-2-3p | -1.19 | 0.000679 | 227.17    | 99.88    | CCGCCCTGACCAGCGCAAAGTGCCAGCGGGGGCAGTGGTG   | CAGTGGT | 34 | 7   | BEGAIN  | 0.82  | 0.03473 | 1.68    | 2.97    | -0.97 |
| cl_26537_chr14 | hsa-miR-18a-3p    | -2.46 | 0.000000 | 88.89     | 16.14    | CCGCCCTGACCAGCGCAAAGTGCCAGCGGGGGCAGTGGTG   | GGGCAGT | 31 | 7   | BEGAIN  | 0.82  | 0.03473 | 1.68    | 2.97    | -2.02 |
| cl_27023_chr15 | hsa-miR-106b-5p   | -1.55 | 0.000000 | 617.66    | 211.04   | TTTTAATATTGATATGCTTATACACTTACACTTTATGCACA  | CACTTTA | 29 | 10  | B2M     | 1.21  | 0.00000 | 2723.06 | 6284.85 | -1.87 |
| cl_27540_chr15 | hsa-miR-628-5p    | 1.10  | 0.000433 | 4.00      | 8.61     | TTGACAGGGCCTTGACAACTGGGTCAGTCTGACGTCAGCATG | TCAGCAT | 34 | 13  | CHRN4   | -0.60 | 0.00027 | 7.68    | 5.06    | -0.66 |
| cl_27846_chr15 | hsa-let-7d-5p     | 0.97  | 0.003359 | 541.68    | 1061.17  | CCTGTGAGGAGGGTTACCTCTGTGGAGCCGGTGAAGGCGAT  | TACCTCT | 15 | 11  | ALDH1A3 | -0.69 | 0.02338 | 22.21   | 13.74   | -0.67 |
| cl_27858_chr15 | hsa-miR-33a-5p    | -1.93 | 0.000079 | 145.43    | 38.10    | ACAGTGAATGCACTTCTCTGCTGCCCTGAGAGACACA      | AATGCAC | 7  | 26  | PCSK6   | 0.73  | 0.01602 | 4.60    | 7.62    | -1.41 |
| cl_27858_chr15 | hsa-miR-33b-5p    | -1.74 | 0.000004 | 19.73     | 5.83     | ACAGTGAATGCACTTCTCTGCTGCCCTGAGAGACACA      | AATGCAC | 7  | 26  | PCSK6   | 0.73  | 0.01602 | 4.60    | 7.62    | -1.27 |
| cl_2798_chr1   | hsa-miR-103a-2-5p | -1.50 | 0.000002 | 5.75      | 2.00     | CAACAGCAGAAGCTTTGATCTGCGGATGAATTGGAGTCTCTG | AGAAGCT | 8  | 11  | CHI3L1  | 2.27  | 0.00065 | 21.30   | 102.42  | -3.40 |
| cl_2798_chr1   | hsa-miR-5695      | -1.35 | 0.003064 | 1.44      | 0.54     | CAACAGCAGAAGCTTTGATCTGCGGATGAATTGGAGTCTCTG | TTGGAGT | 31 | 11  | CHI3L1  | 2.27  | 0.00065 | 21.30   | 102.42  | -3.05 |
| cl_27993_chr16 | hsa-miR-155-3p    | 1.63  | 0.003876 | 0.57      | 1.82     | GCATAGTCGCTGGCAGGAGATGGGGTGTGCGGTAGGAGGGCT | GTAGGAG | 31 | 50  | ZNF598  | -0.78 | 0.00000 | 70.94   | 41.29   | -1.27 |
| cl_2802_chr1   | hsa-miR-4487      | -1.24 | 0.005006 | 1.62      | 0.68     | TCCTGCCAGCTCTGCTCTTTTCAACTCTCCACATTTTGT    | CAGCTCT | 7  | 19  | BTG2    | 0.75  | 0.00006 | 115.17  | 193.59  | -0.93 |
| cl_28215_chr16 | hsa-miR-17-3p     | -2.96 | 0.000000 | 2176.96   | 279.17   | GGCTGCCGCTGAACCCGCCCTGGAGTCTGCACTCCGATCA   | CTGCAGT | 28 | 6   | SNN     | 0.45  | 0.04468 | 32.10   | 43.77   | -1.32 |
| cl_2852_chr1   | hsa-miR-361-3p    | 1.24  | 0.003876 | 615.76    | 1454.95  | GCAGCTGGAACATGAAATCTGGGGAGGGGAAGAGAAT      | TGGGGGA | 21 | 8   | CDK18   | -0.70 | 0.00226 | 13.33   | 8.22    | -0.86 |
| cl_28569_chr16 | hsa-miR-369-3p    | -1.14 | 0.016758 | 3.61      | 1.65     | TTCTTAATGTAGAACCTTTATTATTATAAATCTGTACTAG   | TATTATT | 18 | 10  | ZNF720  | 0.28  | 0.03286 | 21.81   | 26.48   | -0.32 |
| cl_28989_chr16 | hsa-miR-92a-3p    | -1.64 | 0.000068 | 115704.25 | 37245.94 | GAGGGATAAGCCTGCAATATTGACTTACCCTACCTTCCG    | TGCAATA | 13 | 16  | DPEP2   | 1.81  | 0.00000 | 4.06    | 14.23   | -2.96 |
| cl_29294_chr16 | hsa-miR-4746-5p   | -0.99 | 0.005796 | 10.48     | 5.29     | GAGCCAGATTTTGGAGGAGTACGACCCGGTCCCAACTGG    | GGACCCG | 25 | 10  | IRF8    | 0.78  | 0.00037 | 316.32  | 542.76  | -0.77 |
| cl_2937_chr1   | hsa-miR-376a-3p   | -2.14 | 0.000001 | 3.89      | 0.86     | GAAAGTGTCTACAGTCTATGATTAGGTCTCGGTCTTTGG    | CTATGAT | 18 | 14  | LPGAT1  | 0.62  | 0.00033 | 29.67   | 45.69   | -1.34 |
| cl_2937_chr1   | hsa-miR-4523      | -1.05 | 0.028608 | 2.00      | 0.93     | GAAAGTGTCTACAGTCTATGATTAGGTCTCGGTCTTTGG    | CTCGGTC | 30 | 14  | LPGAT1  | 0.62  | 0.00033 | 29.67   | 45.69   | -0.66 |
| cl_2937_chr1   | hsa-miR-3667-5p   | -1.09 | 0.016230 | 1.50      | 0.71     | GAAAGTGTCTACAGTCTATGATTAGGTCTCGGTCTTTGG    | GGTCTTT | 33 | 14  | LPGAT1  | 0.62  | 0.00033 | 29.67   | 45.69   | -0.68 |
| cl_29449_chr16 | hsa-miR-150-3p    | 3.38  | 0.000000 | 3.49      | 36.47    | CAGCCGATCAAGGCTGATGTACCAGCACCCGAGGGACCT    | GTACCAG | 20 | 9   | CPNE7   | -1.66 | 0.00041 | 11.98   | 3.79    | -5.62 |

|                |                  |       |          |         |         |                                            |         |    |     |          |       |         |        |        |        |
|----------------|------------------|-------|----------|---------|---------|--------------------------------------------|---------|----|-----|----------|-------|---------|--------|--------|--------|
| cl_29520_chr17 | hsa-miR-4687-5p  | -0.90 | 0.006179 | 2.46    | 1.27    | CCCCGCCCCCGCCCTTCTCTCCCGAAGGGCTGGG         | AGGGCTG | 33 | 8   | WDR81    | 0.44  | 0.00288 | 42.11  | 57.31  | -0.40  |
| cl_29614_chr17 | hsa-miR-3940-3p  | -0.81 | 0.023652 | 4.97    | 2.86    | CTCTGAGGTGGGCTCTGGGGTGGTGGGCTGGGGCGGGCT    | CGGGCTG | 25 | 384 | GP1BA    | 2.62  | 0.00000 | 1.96   | 12.06  | -2.12  |
| cl_29857_chr17 | hsa-miR-18a-5p   | -1.95 | 0.000000 | 240.54  | 62.15   | ATACGTGCACCACCTTACCCTATACGACCTGGAGGCCCGTG  | CACCTTA | 11 | 8   | SMCR8    | 0.69  | 0.00220 | 10.17  | 16.39  | -1.34  |
| cl_29857_chr17 | hsa-miR-18b-5p   | -1.77 | 0.000287 | 7.70    | 2.25    | ATACGTGCACCACCTTACCCTATACGACCTGGAGGCCCGTG  | CACCTTA | 11 | 8   | SMCR8    | 0.69  | 0.00220 | 10.17  | 16.39  | -1.22  |
| cl_30161_chr17 | hsa-miR-1260a    | 1.07  | 0.037052 | 1.66    | 3.50    | ACATAGCTCTTCGGACCTTGTGGGATGTGCAGGCCAGGAAA  | GTGGGAT | 20 | 7   | DDX52    | -0.33 | 0.01578 | 39.68  | 31.61  | -0.35  |
| cl_30192_chr17 | hsa-miR-641      | -0.72 | 0.009573 | 7.16    | 4.36    | AGCCCTCTAGCCACCCGACTTGTCTTTAATGCCTATAAAAAT | TGCTTTT | 21 | 77  | PLXDC1   | 1.03  | 0.00012 | 7.64   | 15.58  | -0.75  |
| cl_30342_chr17 | hsa-miR-378a-3p  | -1.54 | 0.000000 | 2405.55 | 827.87  | ATTTACCACAGGGTGACAGTCTGACGATCAGTCCAGTTCTCC | GTCCAGT | 30 | 6   | RUNDC3A  | 1.70  | 0.00207 | 0.82   | 2.67   | -2.62  |
| cl_30342_chr17 | hsa-miR-378c     | -1.27 | 0.000000 | 300.43  | 124.57  | ATTTACCACAGGGTGACAGTCTGACGATCAGTCCAGTTCTCC | GTCCAGT | 30 | 6   | RUNDC3A  | 1.70  | 0.00207 | 0.82   | 2.67   | -2.16  |
| cl_30342_chr17 | hsa-miR-378d     | -1.10 | 0.003182 | 14.73   | 6.83    | ATTTACCACAGGGTGACAGTCTGACGATCAGTCCAGTTCTCC | GTCCAGT | 30 | 6   | RUNDC3A  | 1.70  | 0.00207 | 0.82   | 2.67   | -1.87  |
| cl_30342_chr17 | hsa-miR-378i     | -2.12 | 0.000031 | 7.69    | 1.78    | ATTTACCACAGGGTGACAGTCTGACGATCAGTCCAGTTCTCC | GTCCAGT | 30 | 6   | RUNDC3A  | 1.70  | 0.00207 | 0.82   | 2.67   | -3.61  |
| cl_30362_chr17 | hsa-miR-211-5p   | 4.32  | 0.000000 | 0.08    | 1.66    | TGCAATTTTTCCAGATTCCTCTGGAAGGGAAAAAGAAAAG   | AAGGGAA | 26 | 8   | GJC1     | -2.18 | 0.00000 | 29.30  | 6.47   | -9.42  |
| cl_30539_chr17 | hsa-miR-3200-3p  | 1.32  | 0.046718 | 6.16    | 15.43   | TGTAATAAATAAAGTCAAGTGTGAGCTTACGAGCAAGGTGA  | CAAGGTG | 34 | 18  | UTP18    | -0.71 | 0.00000 | 39.62  | 24.26  | -0.94  |
| cl_3082_chr1   | hsa-miR-4424     | 3.24  | 0.000289 | 2.58    | 24.40   | GCTTTGAAGTTAACTCTGGGTTTACTAGTTTGACATTT     | TAAGTCT | 11 | 9   | ENAH     | -0.92 | 0.00244 | 22.95  | 12.12  | -2.98  |
| cl_31050_chr17 | hsa-miR-4797-3p  | -2.18 | 0.000008 | 4.00    | 0.85    | CGTGGACACTCACTGGAGGGTGAACACTGAGAGCTGCGGG   | ACTGAGA | 27 | 17  | CCDC40   | 0.70  | 0.01066 | 1.36   | 2.20   | -1.53  |
| cl_31333_chr18 | hsa-miR-101-5p   | 1.15  | 0.002105 | 4.96    | 11.04   | GTCATCTTCGTGTGATAACTGGCAGGTGTTGCAACTGTGT   | ATAACTG | 16 | 15  | VAPA     | -0.38 | 0.00902 | 94.19  | 72.30  | -0.44  |
| cl_31333_chr18 | hsa-miR-21-3p    | 2.80  | 0.000301 | 738.25  | 5152.52 | GTCATCTTCGTGTGATAACTGGCAGGTGTTGCAACTGTGT   | GGTGTG  | 26 | 15  | VAPA     | -0.38 | 0.00902 | 94.19  | 72.30  | -1.07  |
| cl_3134_chr1   | hsa-miR-485-5p   | -1.88 | 0.001384 | 12.78   | 3.45    | GAGACTGAGGCACCTGGGGATTTCTGTAGCCTCTTTAGGG   | AGCCTCT | 29 | 11  | TRIM17   | 1.17  | 0.00000 | 1.00   | 2.24   | -2.19  |
| cl_31353_chr18 | hsa-miR-29b-2-5p | 1.86  | 0.000000 | 1.75    | 6.53    | GGGAAGATAAAACAGCACGTGTAATGTAATACATGACAAT   | AAACCAG | 10 | 48  | IMPA2    | -1.29 | 0.00000 | 27.80  | 11.37  | -2.41  |
| cl_31353_chr18 | hsa-miR-29b-1-5p | 1.62  | 0.000155 | 2.19    | 6.84    | GGGAAGATAAAACAGCACGTGTAATGTAATACATGACAAT   | AACCAGC | 11 | 48  | IMPA2    | -1.29 | 0.00000 | 27.80  | 11.37  | -2.09  |
| cl_31446_chr18 | hsa-miR-144-5p   | -1.28 | 0.017651 | 225.06  | 92.61   | CTGTGGTCTACCTCCGATGATATCCACAGTCTGTCCAC     | GATATCC | 22 | 13  | LAMA3    | 2.00  | 0.00000 | 4.08   | 16.29  | -2.56  |
| cl_31446_chr18 | hsa-miR-3074-3p  | -1.17 | 0.003837 | 2.43    | 1.05    | CTGTGGTCTACCTCCGATGATATCCACAGTCTGTCCAC     | TGATATC | 21 | 13  | LAMA3    | 2.00  | 0.00000 | 4.08   | 16.29  | -2.33  |
| cl_31955_chr18 | hsa-miR-211-5p   | 4.32  | 0.000000 | 0.08    | 1.66    | CCTTTTTCTGAAGTCTTAAGGGAAGAATATATATTTT      | AAGGGAA | 22 | 5   | CYB5A    | -0.82 | 0.00219 | 39.78  | 22.60  | -3.53  |
| cl_32135_chr19 | hsa-miR-424-5p   | -1.81 | 0.000003 | 177.32  | 50.51   | CGAGCTGGACAGCACGCTGCTGCCACGGGCTCCCAAACG    | GCTGCTG | 16 | 9   | SBNO2    | 1.34  | 0.00000 | 49.31  | 124.72 | -2.42  |
| cl_32173_chr19 | hsa-miR-3648     | -1.65 | 0.002386 | 7.08    | 2.27    | CCCCAACAGGCCACCTGTGTGCGCGCGGGCTGCATGGA     | CGCGGCT | 28 | 17  | APC2     | 0.62  | 0.00028 | 6.56   | 10.04  | -1.01  |
| cl_32173_chr19 | hsa-miR-663b     | -1.67 | 0.001109 | 4.93    | 1.56    | CCCCAACAGGCCACCTGTGTGCGCGCGGGCTGCATGGA     | GGCCACC | 9  | 17  | APC2     | 0.62  | 0.00028 | 6.56   | 10.04  | -1.02  |
| cl_32186_chr19 | hsa-miR-184      | 7.17  | 0.000000 | 0.85    | 123.55  | CGACCCCGCTCACCTCCATCCCTCCACGCGCCGAGCGC     | CCGTCCA | 14 | 55  | TCF3     | -1.95 | 0.00000 | 817.43 | 212.00 | -13.96 |
| cl_32575_chr19 | hsa-miR-4446-3p  | 2.41  | 0.000000 | 0.69    | 3.74    | CCCGACCCGACGATTTCCGATGAGCCCTGGCCTCCAGGAGC  | AGCCCTG | 23 | 15  | CARM1    | -0.67 | 0.00000 | 104.83 | 65.93  | -1.62  |
| cl_32576_chr19 | hsa-miR-34b-3p   | 0.97  | 0.012352 | 0.77    | 1.59    | GTGATTGACAATCCCGTGTGGCTGCGCAGCAGAGGGAG     | GTGATTG | 1  | 15  | CARM1    | -0.67 | 0.00000 | 104.83 | 65.93  | -0.65  |
| cl_32607_chr19 | hsa-miR-3605-3p  | 0.78  | 0.043923 | 3.22    | 5.54    | CCATGGCTACGGGAGCTGGTAAAACTGCCAGGAGGCAA     | ACGGAGG | 32 | 36  | ECSIT    | -1.00 | 0.00000 | 62.21  | 31.13  | -0.78  |
| cl_32607_chr19 | hsa-miR-34a-5p   | 1.22  | 0.000260 | 144.34  | 336.94  | CCATGGCTACGGGAGCTGGTAAAACTGCCAGGAGGCAA     | ACTGCAA | 26 | 36  | ECSIT    | -1.00 | 0.00000 | 62.21  | 31.13  | -1.22  |
| cl_32721_chr19 | hsa-miR-766-3p   | 0.67  | 0.048792 | 39.23   | 62.52   | CAGATGCTGAGGTGAGGCACTGGAGTTGGGAGACTGCTGC   | CTGGAGT | 20 | 23  | ILVBL    | -0.35 | 0.01802 | 34.39  | 27.06  | -0.23  |
| cl_32721_chr19 | hsa-miR-150-5p   | 3.62  | 0.000000 | 649.65  | 7980.39 | CAGATGCTGAGGTGAGGCACTGGAGTTGGGAGACTGCTGC   | TGGGAGA | 27 | 23  | ILVBL    | -0.35 | 0.01802 | 34.39  | 27.06  | -1.25  |
| cl_33164_chr19 | hsa-miR-4446-3p  | 2.41  | 0.000000 | 0.69    | 3.74    | CTGCCCTCCCTGCAGCCCTGATCGTGGTGGCAGTAGCC     | AGCCCTG | 16 | 17  | ARHGAP33 | -0.70 | 0.00017 | 32.54  | 20.10  | -1.68  |
| cl_33482_chr19 | hsa-miR-191-3p   | -0.97 | 0.012382 | 8.66    | 4.37    | CCGGAGGTGCATTTCCACCTTGGCGCAGCCGGATCTCCCTC  | GCGCAGC | 23 | 15  | PNMAL2   | 1.11  | 0.00093 | 0.53   | 1.15   | -1.08  |
| cl_33678_chr19 | hsa-miR-130b-5p  | -2.01 | 0.000006 | 211.10  | 52.39   | GGGCAAAGAGTAGGGTCTGTGGTTGGAGCAGGAGCTTGA    | AAAGAGT | 5  | 19  | SIGLEC10 | 1.37  | 0.00023 | 35.80  | 92.33  | -2.75  |

|                |                 |       |          |          |           |                                            |         |    |    |          |       |         |       |       |       |
|----------------|-----------------|-------|----------|----------|-----------|--------------------------------------------|---------|----|----|----------|-------|---------|-------|-------|-------|
| cl_34014_chr20 | hsa-miR-106b-3p | -1.41 | 0.000000 | 1010.79  | 381.55    | GAGCCGACAGTGACCTGACCTGAAAGTGCGGAGGAAAGGA   | AGTGCGG | 26 | 11 | SLC23A2  | 0.57  | 0.00844 | 44.55 | 66.02 | -0.80 |
| cl_34014_chr20 | hsa-miR-4420    | -2.03 | 0.000161 | 9.58     | 2.34      | GAGCCGACAGTGACCTGACCTGAAAGTGCGGAGGAAAGGA   | CAGTGAC | 8  | 11 | SLC23A2  | 0.57  | 0.00844 | 44.55 | 66.02 | -1.15 |
| cl_34100_chr20 | hsa-miR-3667-3p | -1.36 | 0.008075 | 1.56     | 0.64      | CTTATCTTAGTGACGGATAGTGCAGGAAGGTGCTGTCTCA   | GGAAGGT | 25 | 9  | MACROD2  | 1.25  | 0.00036 | 18.21 | 43.26 | -1.69 |
| cl_34672_chr20 | hsa-miR-335-3p  | -2.49 | 0.000000 | 566.47   | 100.76    | ATGAAAAAAAAAAAAAGAACTTTTCTGCTAGGAAGATTATAC | TGAAAAA | 2  | 47 | TSHZ2    | 1.88  | 0.00000 | 4.94  | 18.12 | -4.67 |
| cl_3469_chr2   | hsa-miR-125a-3p | 1.45  | 0.000079 | 1.91     | 5.30      | GCCAGCATCTGGTCCCTCTGAAGGCACCTGTGGGGCCTA    | CACCTGT | 27 | 46 | TSSC1    | -0.30 | 0.03658 | 44.10 | 35.74 | -0.44 |
| cl_35180_chr21 | hsa-miR-4746-5p | -0.99 | 0.005796 | 10.48    | 5.29      | GGACCGGAGCCGGGGCCTTTTCTTTAAGACTCGCAGCACT   | GGACCGG | 1  | 25 | CBR3     | 1.62  | 0.00000 | 0.93  | 2.85  | -1.61 |
| cl_35269_chr21 | hsa-miR-485-5p  | -1.88 | 0.001384 | 12.78    | 3.45      | ATTTCCCGTGCCTGTGTGCATGTTAGCCTCTGACTATTCT   | AGCCTCT | 25 | 16 | MX2      | 0.66  | 0.00908 | 39.51 | 62.36 | -1.24 |
| cl_35578_chr22 | hsa-miR-766-3p  | 0.67  | 0.048792 | 39.23    | 62.52     | TTGATACAGAGTTCTCACTCTGACGCCAGGCTGGAGTGCA   | CTGGAGT | 32 | 12 | YPEL1    | -0.74 | 0.00021 | 21.93 | 13.15 | -0.50 |
| cl_35578_chr22 | hsa-miR-146a-5p | 3.62  | 0.000000 | 9075.99  | 111335.84 | TTGATACAGAGTTCTCACTCTGACGCCAGGCTGGAGTGCA   | GTTCTCA | 11 | 12 | YPEL1    | -0.74 | 0.00021 | 21.93 | 13.15 | -2.67 |
| cl_35578_chr22 | hsa-miR-146b-5p | 1.74  | 0.002333 | 17080.92 | 57155.72  | TTGATACAGAGTTCTCACTCTGACGCCAGGCTGGAGTGCA   | GTTCTCA | 11 | 12 | YPEL1    | -0.74 | 0.00021 | 21.93 | 13.15 | -1.29 |
| cl_35578_chr22 | hsa-miR-589-5p  | 1.66  | 0.001088 | 53.45    | 169.52    | TTGATACAGAGTTCTCACTCTGACGCCAGGCTGGAGTGCA   | GTTCTCA | 11 | 12 | YPEL1    | -0.74 | 0.00021 | 21.93 | 13.15 | -1.23 |
| cl_35668_chr22 | hsa-miR-191-3p  | -0.97 | 0.012382 | 8.66     | 4.37      | ACTCCCTCCGGCGCAGCCGATTAGTGAGTCCGAGAGCAGA   | GCGCAGC | 11 | 21 | KIAA1671 | 1.27  | 0.00000 | 6.46  | 15.56 | -1.24 |
| cl_35692_chr22 | hsa-miR-125a-3p | 1.45  | 0.000079 | 1.91     | 5.30      | TGAGTGTGCACCTGTACTTGTGGAAGTGACTCTGGGGAT    | CACCTGT | 9  | 13 | TPST2    | -0.37 | 0.00366 | 56.90 | 43.95 | -0.54 |
| cl_35775_chr22 | hsa-miR-485-5p  | -1.88 | 0.001384 | 12.78    | 3.45      | GGAAGCCTCAAGCCTCTGGGTTTTGGGAGAAGCTAGGAAA   | AGCCTCT | 11 | 5  | TBC1D10A | 1.03  | 0.00000 | 13.06 | 26.65 | -1.93 |
| cl_36217_chr22 | hsa-miR-125a-3p | 1.45  | 0.000079 | 1.91     | 5.30      | CAGAGTGGTGGCATGCACCTGTAGCTCAGCTGTTCCGGGAG  | CACCTGT | 17 | 7  | FAM19A5  | -0.83 | 0.02620 | 5.28  | 2.97  | -1.20 |
| cl_36217_chr22 | hsa-miR-221-3p  | 2.71  | 0.000000 | 461.69   | 3018.51   | CAGAGTGGTGGCATGCACCTGTAGCTCAGCTGTTCCGGGAG  | TGTAGCT | 21 | 7  | FAM19A5  | -0.83 | 0.02620 | 5.28  | 2.97  | -2.25 |
| cl_36217_chr22 | hsa-miR-222-3p  | 2.13  | 0.000000 | 339.42   | 1483.20   | CAGAGTGGTGGCATGCACCTGTAGCTCAGCTGTTCCGGGAG  | TGTAGCT | 21 | 7  | FAM19A5  | -0.83 | 0.02620 | 5.28  | 2.97  | -1.76 |
| cl_36473_chrX  | hsa-miR-3648    | -1.65 | 0.002386 | 7.08     | 2.27      | GGCGCGGGCTTTCGGGCGGTGCGGCTGCGGCTGAGCCCT    | CGCGGCT | 5  | 8  | RPS6KA3  | 0.60  | 0.00014 | 62.71 | 95.17 | -0.99 |
| cl_36477_chrX  | hsa-miR-654-5p  | -1.68 | 0.000699 | 4.43     | 1.38      | TCTGGCCTCCAGAATCTCTGTCTCCACCAAGTTAATGCAC   | CCCACCA | 25 | 7  | RPS6KA3  | 0.60  | 0.00014 | 62.71 | 95.17 | -1.01 |
| cl_36508_chrX  | hsa-miR-374a-5p | 2.74  | 0.000000 | 79.70    | 534.11    | AAAAGTGAGGATGGAATCGCTGTAATGACCATTATAACAAA  | ATTATAA | 31 | 17 | KLHL15   | -0.79 | 0.00000 | 20.29 | 11.74 | -2.17 |
| cl_37500_chrX  | hsa-miR-3661    | -1.44 | 0.000180 | 7.00     | 2.53      | GCCAAATCTCAAAGCCCTTTCGGGCGGAAGACAGGTCAGG   | CAGGTCA | 33 | 22 | PDZD4    | 0.92  | 0.01544 | 1.58  | 3.00  | -1.33 |
| cl_37633_chrY  | hsa-miR-345-5p  | 1.22  | 0.000700 | 68.98    | 161.32    | CCTATGTTCACTCAAGGCCCTAGAGTTCTACAGTCAGCAGA  | AGTCAGC | 32 | 36 | TMSB4Y   | -1.02 | 0.03634 | 1.59  | 0.78  | -1.25 |
| cl_37633_chrY  | hsa-miR-3136-5p | 1.49  | 0.009911 | 0.81     | 2.26      | CCTATGTTCACTCAAGGCCCTAGAGTTCTACAGTCAGCAGA  | CAGTCAG | 31 | 36 | TMSB4Y   | -1.02 | 0.03634 | 1.59  | 0.78  | -1.52 |
| cl_3781_chr2   | hsa-miR-3648    | -1.65 | 0.002386 | 7.08     | 2.27      | GGCCTGGCGGGCGTGCAGGCTGCCCTCGCCCTCCTGCA     | CGCGGCT | 15 | 6  | ZNF513   | 0.95  | 0.00000 | 9.49  | 18.27 | -1.56 |
| cl_414_chr1    | hsa-miR-188-3p  | 1.50  | 0.002747 | 0.97     | 2.82      | CAAGAATGTGGGAGTATGTCTGCCGTTTCAACACACACAG   | GTGGGAG | 8  | 27 | UBE4B    | -0.39 | 0.00291 | 58.61 | 44.70 | -0.59 |
| cl_429_chr1    | hsa-miR-27b-5p  | -0.99 | 0.003393 | 21.19    | 10.62     | CCCCAAGCTCTCGAGTCCTGTCCCTCCGCCATTCTCT      | AAGCTCT | 5  | 71 | CASZ1    | 0.55  | 0.02186 | 7.31  | 10.72 | -0.55 |
| cl_475_chr1    | hsa-miR-181b-3p | -0.88 | 0.018103 | 19.40    | 10.56     | AGCACTGGCCTGGCTCACCTTCACTGAGCACAGAGAAGCA   | CAGTGAG | 23 | 20 | VPS13D   | 0.67  | 0.00063 | 47.50 | 75.72 | -0.59 |
| cl_475_chr1    | hsa-miR-4755-3p | -1.99 | 0.000050 | 2.99     | 0.74      | AGCACTGGCCTGGCTCACCTTCACTGAGCACAGAGAAGCA   | CCTGGCT | 9  | 20 | VPS13D   | 0.67  | 0.00063 | 47.50 | 75.72 | -1.34 |
| cl_5154_chr2   | hsa-miR-3613-3p | -0.59 | 0.049047 | 4.41     | 2.92      | GTTTTTTTGTCTTCGAAAGTGCTTGGCTTTTCTTGTGG     | TTTTTGT | 5  | 34 | RND3     | 1.60  | 0.00000 | 3.91  | 11.87 | -0.95 |
| cl_5205_chr2   | hsa-miR-4755-3p | -1.99 | 0.000050 | 2.99     | 0.74      | ACAGAACTTAACTGGCTTTCGAGTCCGACGCTCTCAAC     | CCTGGCT | 13 | 8  | GPD2     | 0.50  | 0.02392 | 19.89 | 28.05 | -0.99 |
| cl_5338_chr2   | hsa-miR-374b-5p | 2.84  | 0.000010 | 34.89    | 250.55    | TTACTACTACACTGAAAATTTGATTATATTCTAGTATTTT   | ATTATAT | 24 | 10 | PPIG     | -0.26 | 0.03304 | 90.94 | 75.69 | -0.75 |
| cl_5431_chr2   | hsa-miR-369-3p  | -1.14 | 0.016758 | 3.61     | 1.65      | ACAGAAAAGCGTTCTAAGTCTGACAATTTATTATTCAATGC  | TATTATT | 29 | 6  | CHN1     | 1.88  | 0.00000 | 6.18  | 22.83 | -2.15 |
| cl_5659_chr2   | hsa-let-7d-5p   | 0.97  | 0.003359 | 541.68   | 1061.17   | GAAAATGTCCCTTTCATTACCTCTCTGGAGACTTCTT      | TACCTCT | 22 | 8  | NIF3L1   | -0.79 | 0.00000 | 49.01 | 28.34 | -0.77 |
| cl_5847_chr2   | hsa-miR-25-3p   | -1.36 | 0.000000 | 10846.28 | 4235.46   | TGGCTCAGCTGGGAGGGCGTTGCAATGGCAGGTGGCATGCG  | TGCAATG | 21 | 23 | RUFY4    | 1.84  | 0.00001 | 4.22  | 15.08 | -2.49 |
| cl_5955_chr2   | hsa-miR-155-3p  | 1.63  | 0.003876 | 0.57     | 1.82      | AATGAGTAGTAGGAGAGGACTGGCTGTGCTGGGGTCTCT    | GTAGGAG | 9  | 6  | IRS1     | -0.70 | 0.00273 | 25.28 | 15.51 | -1.15 |

|              |                  |       |          |          |          |                                             |         |    |     |          |       |         |        |        |       |
|--------------|------------------|-------|----------|----------|----------|---------------------------------------------|---------|----|-----|----------|-------|---------|--------|--------|-------|
| cl_6263_chr3 | hsa-miR-3136-5p  | 1.49  | 0.009911 | 0.81     | 2.26     | ATGCAAGGTCTACAGTCAGATGAGCATCTAACACAATTGG    | CAGTCAG | 13 | 11  | SETMAR   | -1.03 | 0.00000 | 14.48  | 7.08   | -1.54 |
| cl_6299_chr3 | hsa-miR-138-1-3p | 2.08  | 0.003225 | 3.50     | 14.83    | ATAAAGAAAGTAGCAATTATTCAAATGAGAAACACTTCTG    | AAGTAGC | 9  | 5   | RAD18    | -0.97 | 0.00000 | 45.04  | 22.95  | -2.02 |
| cl_6596_chr3 | hsa-miR-19a-5p   | -1.78 | 0.000041 | 24.62    | 7.20     | GTGATACCTCATCAGACAGCTGTTGACAAAACGTATGTG     | CAAAACT | 27 | 5   | STAC     | 1.03  | 0.00348 | 1.11   | 2.28   | -1.84 |
| cl_6596_chr3 | hsa-miR-19b-1-5p | -1.98 | 0.000000 | 4.46     | 1.18     | GTGATACCTCATCAGACAGCTGTTGACAAAACGTATGTG     | CAAAACT | 27 | 5   | STAC     | 1.03  | 0.00348 | 1.11   | 2.28   | -2.05 |
| cl_6620_chr3 | hsa-miR-17-3p    | -2.96 | 0.000000 | 2176.96  | 279.17   | GGAGCTGCAGTGAAGCGAACTGGGGGAACTATTAGAGGCT    | CTGCAGT | 5  | 38  | PLCD1    | 1.96  | 0.00000 | 4.93   | 19.17  | -5.80 |
| cl_6655_chr3 | hsa-miR-17-3p    | -2.96 | 0.000000 | 2176.96  | 279.17   | AACAGGTGATCTTATGGATATTTGGGAGCTGCAGTGGATAC   | CTGCAGT | 29 | 20  | CX3CR1   | 1.95  | 0.00000 | 0.81   | 3.14   | -5.78 |
| cl_6674_chr3 | hsa-miR-296-5p   | -1.00 | 0.001384 | 13.99    | 7.04     | TAGAGCTGGTACCAATAAATGGGTGGGGGTGGGGCCCTGC    | GGGCCCT | 33 | 19  | ULK4     | 0.69  | 0.00000 | 17.81  | 28.71  | -0.69 |
| cl_6676_chr3 | hsa-miR-369-3p   | -1.14 | 0.016758 | 3.61     | 1.65     | AAATCAATTCCGGTTGGATTACTTTCGTGTATTATTAC      | TATTATT | 33 | 20  | ULK4     | 0.69  | 0.00000 | 17.81  | 28.71  | -0.78 |
| cl_6939_chr3 | hsa-miR-17-5p    | -1.37 | 0.000088 | 1233.06  | 477.71   | TTTGTTAAAGTTGGAGGTCTGCTGTAGCACTTTGGTACCA    | CACTTTG | 29 | 12  | CACNA1D  | 3.16  | 0.00000 | 1.64   | 14.70  | -4.33 |
| cl_6939_chr3 | hsa-miR-20b-5p   | -1.12 | 0.042021 | 59.74    | 27.49    | TTTGTTAAAGTTGGAGGTCTGCTGTAGCACTTTGGTACCA    | CACTTTG | 29 | 12  | CACNA1D  | 3.16  | 0.00000 | 1.64   | 14.70  | -3.54 |
| cl_6939_chr3 | hsa-miR-3609     | -2.85 | 0.000000 | 596.50   | 83.01    | TTTGTTAAAGTTGGAGGTCTGCTGTAGCACTTTGGTACCA    | CACTTTG | 29 | 12  | CACNA1D  | 3.16  | 0.00000 | 1.64   | 14.70  | -9.00 |
| cl_6939_chr3 | hsa-miR-93-5p    | -1.06 | 0.001859 | 2255.60  | 1081.01  | TTTGTTAAAGTTGGAGGTCTGCTGTAGCACTTTGGTACCA    | CACTTTG | 29 | 12  | CACNA1D  | 3.16  | 0.00000 | 1.64   | 14.70  | -3.36 |
| cl_6952_chr3 | hsa-miR-3667-3p  | -1.36 | 0.008075 | 1.56     | 0.64     | CAGGTCCACGCCACGGTAGGTGAACCTGCGGAAGGTCTGCT   | GGAAGGT | 30 | 38  | CACNA2D3 | 0.81  | 0.00262 | 6.09   | 10.65  | -1.09 |
| cl_6990_chr3 | hsa-miR-1254     | -1.46 | 0.000090 | 5.06     | 1.83     | AGCAAGAGAGAGTAGGGAGTGCAGGCTCTTTTATATAC      | CCAGGCT | 23 | 24  | ABHD6    | 0.49  | 0.00351 | 6.95   | 9.77   | -0.72 |
| cl_7040_chr3 | hsa-miR-27a-5p   | 0.94  | 0.010984 | 14.83    | 28.56    | TGGAGAAGCCCTCATCTCTGGCACAAAGACAGTGACAT      | AAGCCCT | 6  | 13  | CADPS    | -4.03 | 0.00000 | 74.14  | 4.55   | -3.80 |
| cl_7040_chr3 | hsa-miR-9-5p     | 2.02  | 0.000177 | 22.16    | 90.19    | TGGAGAAGCCCTCATCTCTGGCACAAAGACAGTGACAT      | CCAAAGA | 26 | 13  | CADPS    | -4.03 | 0.00000 | 74.14  | 4.55   | -8.15 |
| cl_7113_chr3 | hsa-miR-19a-3p   | -2.41 | 0.000000 | 1852.64  | 349.18   | CCGTGACTGCCCTCTAGGGGTGAAAGACTAACTTTGCACAC   | TTGCACA | 34 | 5   | FRMD4B   | 1.09  | 0.00000 | 10.94  | 23.34  | -2.63 |
| cl_7113_chr3 | hsa-miR-19b-3p   | -1.82 | 0.000000 | 1655.38  | 468.75   | CCGTGACTGCCCTCTAGGGGTGAAAGACTAACTTTGCACAC   | TTGCACA | 34 | 5   | FRMD4B   | 1.09  | 0.00000 | 10.94  | 23.34  | -1.99 |
| cl_712_chr1  | hsa-miR-4424     | 3.24  | 0.000289 | 2.58     | 24.40    | CCTCGGTAACCTTCCCTCTTTCTCTAATCAGACAGCC       | TAACTCT | 8  | 5   | ID3      | -1.54 | 0.00000 | 106.48 | 36.60  | -4.99 |
| cl_7144_chr3 | hsa-miR-17-3p    | -2.96 | 0.000000 | 2176.96  | 279.17   | AATAGGCCCTGCAGCTTTTTGTAGCGGTAAGTACTGACGCTTT | CTGCAGT | 9  | 6   | EIF4E3   | 1.37  | 0.00000 | 6.45   | 16.64  | -4.05 |
| cl_7144_chr3 | hsa-miR-3613-3p  | -0.59 | 0.049047 | 4.41     | 2.92     | AATAGGCCCTGCAGCTTTTTGTAGCGGTAAGTACTGACGCTTT | TTTTTGT | 17 | 6   | EIF4E3   | 1.37  | 0.00000 | 6.45   | 16.64  | -0.81 |
| cl_7200_chr3 | hsa-miR-3942-5p  | -0.98 | 0.015065 | 2.95     | 1.47     | ATTGCTTAGAAGCAGCCACATTTAAAAATTTGCTTTGTACC   | ATTGCTT | 1  | 11  | ROBO1    | 1.69  | 0.00000 | 12.93  | 41.66  | -1.66 |
| cl_7297_chr3 | hsa-miR-4446-3p  | 2.41  | 0.000000 | 0.69     | 3.74     | TAAGCTAAAAGAGCCCTGTTGTCTCTAGGTCAGATCAA      | AGCCCTG | 13 | 49  | DCBLD2   | -0.50 | 0.01879 | 14.59  | 10.28  | -1.22 |
| cl_7297_chr3 | hsa-miR-21-5p    | 0.77  | 0.013126 | 41871.47 | 71633.34 | TAAGCTAAAAGAGCCCTGTTGTCTCTAGGTCAGATCAA      | TAAGCTA | 1  | 49  | DCBLD2   | -0.50 | 0.01879 | 14.59  | 10.28  | -0.39 |
| cl_742_chr1  | hsa-miR-20a-3p   | -2.86 | 0.000000 | 28.86    | 3.93     | GTTTGGGGGAGTCGGGAGGATGCACTCTTTGCAGCAGTG     | ATGCAGT | 20 | 179 | RUNX3    | 0.43  | 0.02380 | 59.56  | 80.13  | -1.23 |
| cl_742_chr1  | hsa-miR-93-3p    | -2.56 | 0.000000 | 153.44   | 25.99    | GTTTGGGGGAGTCGGGAGGATGCACTCTTTGCAGCAGTG     | CAGCAGT | 34 | 179 | RUNX3    | 0.43  | 0.02380 | 59.56  | 80.13  | -1.10 |
| cl_7488_chr3 | hsa-miR-641      | -0.72 | 0.009573 | 7.16     | 4.36     | TCTTGTCTTTGGTTTCAGAGTGGGGTATGTAAGCGAGGTAT   | TGTCTTT | 4  | 25  | ILDR1    | 1.82  | 0.00000 | 2.27   | 8.00   | -1.32 |
| cl_7700_chr3 | hsa-miR-4662a-5p | 1.64  | 0.000301 | 0.82     | 2.46     | AATGTTAAAGACTCTTTTTCTGCTCCAGCACACTGGCTAAA   | TGGCTAA | 34 | 6   | TOPBP1   | -0.83 | 0.00000 | 202.23 | 113.47 | -1.37 |
| cl_7739_chr3 | hsa-miR-1304-3p  | -1.38 | 0.000040 | 25.27    | 9.67     | GGTCTCTGTTCTACATCAGCTGATCTGCTCCAGTGAGACT    | AGTGAGA | 33 | 42  | MRAS     | 0.66  | 0.01123 | 6.48   | 10.25  | -0.92 |
| cl_7739_chr3 | hsa-miR-181b-3p  | -0.88 | 0.018103 | 19.40    | 10.56    | GGTCTCTGTTCTACATCAGCTGATCTGCTCCAGTGAGACT    | CAGTGAG | 32 | 42  | MRAS     | 0.66  | 0.01123 | 6.48   | 10.25  | -0.58 |
| cl_7765_chr3 | hsa-miR-500a-5p  | -0.95 | 0.004910 | 11.56    | 5.93     | ATGCCAGGATTAAGCAGCTGGTGGCTCGCTGGGTACCTC     | AGGATTA | 6  | 6   | CLSTN2   | 1.87  | 0.00001 | 2.00   | 7.32   | -1.78 |
| cl_788_chr1  | hsa-miR-145-5p   | -1.46 | 0.002408 | 414.75   | 150.53   | CTTTGCTCGAATGTGCTATTGCTACATGACTGGACTAGGC    | ACTGGAC | 30 | 11  | PIGV     | 0.47  | 0.00257 | 7.90   | 10.94  | -0.69 |
| cl_8050_chr3 | hsa-miR-4781-3p  | 1.58  | 0.000108 | 0.49     | 1.50     | AGTGAGGTAGTAGTTAGTCGTCTTCTACAACATTTAGC      | CAACATT | 30 | 14  | EIF5A2   | -0.80 | 0.00019 | 7.19   | 4.14   | -1.26 |
| cl_8218_chr3 | hsa-miR-432-5p   | -1.20 | 0.006297 | 9.90     | 4.31     | GTTGGCTCCAAGATAGTACCTGTAGTAATTCTGGAGCTTGT   | TCCAAGA | 7  | 27  | DGKG     | 3.10  | 0.00000 | 3.01   | 25.90  | -3.71 |
| cl_8369_chr3 | hsa-miR-2467-5p  | 1.46  | 0.003890 | 3.95     | 10.85    | TAAATGGCACCCACGGGCTGGGTGGAGCTCAGCACCCAC     | AGCCTCA | 28 | 8   | DLG1     | -0.38 | 0.00692 | 94.72  | 72.84  | -0.55 |

|               |                  |       |          |         |          |                                            |         |    |      |          |       |         |        |        |       |
|---------------|------------------|-------|----------|---------|----------|--------------------------------------------|---------|----|------|----------|-------|---------|--------|--------|-------|
| cl_8530_chr4  | hsa-miR-181a-3p  | -0.96 | 0.000287 | 612.96  | 314.69   | GATGGTAATAACGGTGGTCTGACGATGGTGGTGGTATGA    | CGATGGT | 24 | 8    | MSX1     | 1.39  | 0.00001 | 0.58   | 1.51   | -1.33 |
| cl_8732_chr4  | hsa-miR-10b-3p   | 3.02  | 0.000000 | 1.45    | 11.98    | CATTATTAAGTAAAGTCTGTGCCAGAAACAAAACATT      | AATCTGT | 17 | 5    | LCORL    | -1.45 | 0.00000 | 53.91  | 19.78  | -4.37 |
| cl_8754_chr4  | hsa-miR-221-3p   | 2.71  | 0.000000 | 461.69  | 3018.51  | TCTGTACATCCCTCCGTTAGATGTGACCTGTAGCTC       | TGTAGCT | 34 | 9    | GPR125   | -1.08 | 0.00444 | 8.24   | 3.89   | -2.93 |
| cl_8754_chr4  | hsa-miR-222-3p   | 2.13  | 0.000000 | 339.42  | 1483.20  | TCTGTACATCCCTCCGTTAGATGTGACCTGTAGCTC       | TGTAGCT | 34 | 9    | GPR125   | -1.08 | 0.00444 | 8.24   | 3.89   | -2.30 |
| cl_8900_chr4  | hsa-miR-23a-5p   | 1.60  | 0.000302 | 2.14    | 6.53     | TGCATCTTCATCTGAATCTTCTCAGGAACCCCAATAAA     | GAACCCC | 29 | 21   | PDSSA    | -0.56 | 0.00001 | 278.84 | 189.36 | -0.89 |
| cl_9235_chr4  | hsa-miR-766-3p   | 0.67  | 0.048792 | 39.23   | 62.52    | CGATTTCCCTCTGCTGCTGGAGTAATGATTAATATCCC     | CTGGAGT | 20 | 6    | COPS4    | -0.60 | 0.00000 | 58.60  | 38.59  | -0.40 |
| cl_9291_chr4  | hsa-miR-641      | -0.72 | 0.009573 | 7.16    | 4.36     | GGAAGAGTTCTACAGCCCCATGATTAGGTCTGTCTTTAGT   | TGTCTTT | 31 | 26   | FAM13A   | 0.62  | 0.01100 | 9.41   | 14.43  | -0.45 |
| cl_9425_chr4  | hsa-miR-1295a    | -1.77 | 0.001363 | 16.54   | 4.85     | GTGAGCACAATGCTAGGGCCTAAAAGATGGTGAACATGCCC  | GGCCTAA | 17 | 1137 | DKK2     | 0.66  | 0.00754 | 1.00   | 1.58   | -1.17 |
| cl_9693_chr4  | hsa-miR-335-3p   | -2.49 | 0.000000 | 566.47  | 100.76   | AAACTAAATTCAGCAGCGTGTGAAAAACCTTACCTACCACA  | TGAAAAA | 21 | 10   | IL15     | 1.42  | 0.00000 | 2.55   | 6.85   | -3.55 |
| cl_9800_chr4  | hsa-miR-378a-3p  | -1.54 | 0.000000 | 2405.55 | 827.87   | TCCCCCATGCCACCCACCTGACCCCTCTTGCCAGTCCA     | GTCCAGT | 32 | 67   | TRIM2    | 0.84  | 0.00027 | 6.23   | 11.13  | -1.29 |
| cl_9800_chr4  | hsa-miR-378c     | -1.27 | 0.000000 | 300.43  | 124.57   | TCCCCCATGCCACCCACCTGACCCCTCTTGCCAGTCCA     | GTCCAGT | 32 | 67   | TRIM2    | 0.84  | 0.00027 | 6.23   | 11.13  | -1.06 |
| cl_9800_chr4  | hsa-miR-378d     | -1.10 | 0.003182 | 14.73   | 6.83     | TCCCCCATGCCACCCACCTGACCCCTCTTGCCAGTCCA     | GTCCAGT | 32 | 67   | TRIM2    | 0.84  | 0.00027 | 6.23   | 11.13  | -0.92 |
| cl_9800_chr4  | hsa-miR-378i     | -2.12 | 0.000031 | 7.69    | 1.78     | TCCCCCATGCCACCCACCTGACCCCTCTTGCCAGTCCA     | GTCCAGT | 32 | 67   | TRIM2    | 0.84  | 0.00027 | 6.23   | 11.13  | -1.78 |
| cl_10083_chr4 | hsa-miR-3922-3p  | 1.24  | 0.017898 | 0.75    | 1.82     | GAAATCACACTCATATATAATCAAGGCCAGCCCTGTGGTT   | AGGCCAG | 25 | 12   | SORBS2   | -1.13 | 0.00001 | 18.37  | 8.37   | -1.41 |
| cl_10083_chr4 | hsa-miR-140-3p   | 0.74  | 0.009811 | 2206.05 | 3679.70  | GAAATCACACTCATATATAATCAAGGCCAGCCCTGTGGTT   | CTGTGGT | 34 | 12   | SORBS2   | -1.13 | 0.00001 | 18.37  | 8.37   | -0.84 |
| cl_10440_chr5 | hsa-miR-4662a-5p | 1.64  | 0.000301 | 0.82    | 2.46     | CTTGTGGAGACTTCTGGTATTGGCTAGGGGGTCATCTGT    | TTGGCTA | 20 | 11   | CDH12    | -1.47 | 0.00000 | 194.46 | 70.14  | -2.42 |
| cl_10644_chr5 | hsa-miR-4999-5p  | 1.47  | 0.000026 | 0.45    | 1.31     | TTATAAGAGCTGATACAGCTCAAGAGTGGAAAAACAATA    | ATACAGC | 14 | 53   | NDUFS4   | -0.38 | 0.01006 | 37.97  | 29.17  | -0.56 |
| cl_10803_chr5 | hsa-miR-23a-3p   | 0.83  | 0.001283 | 640.05  | 1134.81  | TCCATGTGATTTTCTTATATACTGTGAATGTGAAAACCTA   | AATGTGA | 28 | 14   | TNPO1    | -0.36 | 0.00399 | 102.67 | 80.04  | -0.30 |
| cl_10803_chr5 | hsa-miR-181a-5p  | 1.32  | 0.014841 | 7336.45 | 18322.20 | TCCATGTGATTTTCTTATATACTGTGAATGTGAAAACCTA   | TGAATGT | 26 | 14   | TNPO1    | -0.36 | 0.00399 | 102.67 | 80.04  | -0.47 |
| cl_10803_chr5 | hsa-miR-181c-5p  | 2.83  | 0.000011 | 218.96  | 1560.77  | TCCATGTGATTTTCTTATATACTGTGAATGTGAAAACCTA   | TGAATGT | 26 | 14   | TNPO1    | -0.36 | 0.00399 | 102.67 | 80.04  | -1.02 |
| cl_1089_chr1  | hsa-miR-138-1-3p | 2.08  | 0.003225 | 3.50    | 14.83    | TTTAGGAGATAAGGTTCCACTAGAAAGTAGGTAGTATACCCC | GAAGTAG | 23 | 19   | SCMH1    | -0.70 | 0.00002 | 48.40  | 29.74  | -1.46 |
| cl_11223_chr5 | hsa-miR-296-3p   | -1.98 | 0.000000 | 6.56    | 1.66     | CACCTGCCGCAACCTTGTGTTTGTAGTGGAAAAGATCTGTA  | CAACCCT | 11 | 8    | TNFAIP8  | 0.44  | 0.02745 | 94.44  | 128.24 | -0.87 |
| cl_1156_chr1  | hsa-miR-3065-3p  | -1.21 | 0.004663 | 1.20    | 0.49     | GGTGCTGGGCTCAAACCTCTGTGGAGCAGCCCCACCCCA    | GGTGCTG | 1  | 251  | CCDC24   | 1.02  | 0.00303 | 4.96   | 10.08  | -1.24 |
| cl_1163_chr1  | hsa-miR-628-5p   | 1.10  | 0.000433 | 4.00    | 8.61     | TTGTCAGCAGCCACGACCTTTGGTGTACCTGTCTCAGTTG   | GTCAGCA | 3  | 9    | RNF220   | -0.30 | 0.02242 | 86.03  | 70.02  | -0.33 |
| cl_1164_chr1  | hsa-miR-151a-5p  | 1.39  | 0.000409 | 359.84  | 940.64   | ACCGCAGCGTCTCCCTCTCGCCCCGCGCCCTCCCTCCC     | CTCCTCG | 17 | 18   | RNF220   | -0.30 | 0.02242 | 86.03  | 70.02  | -0.41 |
| cl_1164_chr1  | hsa-miR-151b     | 3.24  | 0.000000 | 15.47   | 146.00   | ACCGCAGCGTCTCCCTCTCGCCCCGCGCCCTCCCTCCC     | CTCCTCG | 17 | 18   | RNF220   | -0.30 | 0.02242 | 86.03  | 70.02  | -0.96 |
| cl_11692_chr5 | hsa-miR-154-5p   | -1.78 | 0.000287 | 2.46    | 0.71     | CAGGCTAACCTGGAGTGCCATCCAGGAAATAACCTGAAC    | ATAACCT | 31 | 6    | ANXA6    | 0.83  | 0.00050 | 190.05 | 337.97 | -1.48 |
| cl_11790_chr5 | hsa-miR-29b-1-5p | 1.62  | 0.000155 | 2.19    | 6.84     | AATCAAAATCAAACCTATCAAACCTCCAAACCCAGAAGCT   | AAACCAG | 30 | 12   | PWWP2A   | -0.27 | 0.03529 | 40.32  | 33.42  | -0.44 |
| cl_11899_chr5 | hsa-miR-15b-3p   | -0.95 | 0.002065 | 65.01   | 33.63    | ATTGAATATTAGTGATAGCATGATTATAATGATACTGTAT   | ATGATTC | 20 | 7    | RANBP17  | 0.36  | 0.03485 | 4.25   | 5.44   | -0.34 |
| cl_11906_chr5 | hsa-miR-154-5p   | -1.78 | 0.000287 | 2.46    | 0.71     | GCATAACCTAGAAACATACTGAAGCTGTGGATAAATTCAG   | ATAACCT | 3  | 19   | RANBP17  | 0.36  | 0.03485 | 4.25   | 5.44   | -0.63 |
| cl_11953_chr5 | hsa-miR-4745-5p  | -1.56 | 0.000679 | 4.57    | 1.52     | TTCTGAGAACAAGTAGCCATTTGGTCCCACTCTGCTTAT    | CCCACTC | 27 | 14   | STC2     | 0.86  | 0.03234 | 1.41   | 2.55   | -1.34 |
| cl_12055_chr5 | hsa-miR-30b-3p   | 1.06  | 0.009573 | 2.25    | 4.76     | GCAAATGATGATTACCTCTACCTCCCACTGTGTGCC       | CCTCCCA | 24 | 23   | RMND5B   | -0.60 | 0.00002 | 70.50  | 46.35  | -0.64 |
| cl_1208_chr1  | hsa-miR-149-5p   | -1.00 | 0.003123 | 13.82   | 6.89     | CCATTGTTGGTTTCTAGAGATGGAGCCAGCCAGGGACCC    | GAGCCAG | 23 | 8    | POMGNT1  | 0.40  | 0.00199 | 28.52  | 37.71  | -0.40 |
| cl_12176_chr6 | hsa-miR-5695     | -1.35 | 0.003064 | 1.44    | 0.54     | CCTCAGCTCTCCGCGCCTGGAGCGTGTGCAAGTGCCT      | CTTGGAG | 20 | 19   | FOXC1    | 2.38  | 0.00000 | 0.95   | 4.98   | -3.21 |
| cl_13131_chr6 | hsa-miR-188-3p   | 1.50  | 0.002747 | 0.97    | 2.82     | TTAGAAGCTTAGGTTGTGATTTTTAATGTGGGAAAACAAG   | TGTGGGA | 28 | 37   | IRAK1BP1 | -0.45 | 0.00274 | 71.93  | 52.58  | -0.68 |

|               |                   |       |          |         |         |                                            |          |    |     |          |       |         |        |       |       |
|---------------|-------------------|-------|----------|---------|---------|--------------------------------------------|----------|----|-----|----------|-------|---------|--------|-------|-------|
| cl_13195_chr6 | hsa-miR-299-3p    | -1.46 | 0.003877 | 4.09    | 1.48    | TGCCACATCGTTCTACAGATCGACAATGCCCGTCTTGCTG   | CCCACAT  | 3  | 83  | NT5E     | 0.92  | 0.00981 | 4.87   | 9.18  | -1.34 |
| cl_13223_chr6 | hsa-let-7b-3p     | 1.17  | 0.001317 | 16.34   | 36.79   | TATTTGTATACTTCTAGGGGTCTGGTGGTCTAGCGACTGA   | TTGTATA  | 4  | 86  | PM20D2   | -1.10 | 0.00000 | 57.20  | 26.62 | -1.29 |
| cl_14194_chr7 | hsa-miR-130b-3p   | -2.24 | 0.000000 | 701.16  | 148.59  | CAGATATTTATGCCATCCAGTGGTTCAGCTCAGATAAAAAAT | TTGCACT  | 24 | 7   | SDK1     | 0.68  | 0.03704 | 10.53  | 16.82 | -1.51 |
| cl_14194_chr7 | hsa-miR-301a-3p   | -0.65 | 0.023052 | 241.53  | 153.73  | CAGATATTTATGCCATCCAGTGGTTCAGCTCAGATAAAAAAT | TTGCACT  | 24 | 7   | SDK1     | 0.68  | 0.03704 | 10.53  | 16.82 | -0.44 |
| cl_1421_chr1  | hsa-miR-15b-3p    | -0.95 | 0.002065 | 65.01   | 33.63   | GTAATGGCTTCATTAGCTGATCTGTCTATGATTCC        | ATGATTCC | 34 | 16  | CACHD1   | 0.92  | 0.00433 | 2.30   | 4.34  | -0.88 |
| cl_14245_chr7 | hsa-miR-184       | 7.17  | 0.000000 | 0.85    | 123.55  | TCCTCAGAACCTCCACGCCCTCCTCATCTCCGTCCTGGCA   | TCCGTCC  | 29 | 23  | FBXL18   | -0.68 | 0.00001 | 16.68  | 10.39 | -4.90 |
| cl_14254_chr7 | hsa-miR-589-3p    | -1.73 | 0.000002 | 17.95   | 5.34    | GACCCATCTCGCGCGGGGGTTTTGTCTGTGCCGCCTAA     | TGTTCTG  | 24 | 5   | RNF216   | 0.66  | 0.00001 | 42.08  | 66.54 | -1.14 |
| cl_1472_chr1  | hsa-miR-582-5p    | 1.76  | 0.002936 | 4.61    | 15.62   | CATGGCCTGGGGAAAACTGAAGTGTAGAGGATCGAAAAG    | AACTGTA  | 23 | 18  | DEPDC1   | -1.95 | 0.00000 | 33.25  | 8.59  | -3.44 |
| cl_1475_chr1  | hsa-miR-29c-5p    | 2.01  | 0.000000 | 12.60   | 50.98   | TGCTGTGTATGCAGTCCGATGATCGGTCCTTGTGGTAAGG   | ATCGGTC  | 23 | 9   | LRRC7    | -0.73 | 0.00000 | 26.92  | 16.18 | -1.48 |
| cl_1475_chr1  | hsa-miR-425-5p    | 1.28  | 0.007710 | 562.69  | 1362.90 | TGCTGTGTATGCAGTCCGATGATCGGTCCTTGTGGTAAGG   | GTGCAT   | 5  | 9   | LRRC7    | -0.73 | 0.00000 | 26.92  | 16.18 | -0.94 |
| cl_14791_chr7 | hsa-miR-154-5p    | -1.78 | 0.000287 | 2.46    | 0.71    | CCTCTCCCATATAACCTTTGACGAGTGCACCTGTCTCC     | ATAACCT  | 13 | 11  | GRB10    | 0.55  | 0.01905 | 6.77   | 9.91  | -0.98 |
| cl_15068_chr7 | hsa-miR-181a-2-3p | -1.19 | 0.000679 | 227.17  | 99.88   | TCTCGGGTGGACTTAATCAGTGGGTATAGGTTTTGCTTGG   | TCAGTGG  | 17 | 25  | SEMA3D   | 1.52  | 0.00001 | 1.87   | 5.36  | -1.80 |
| cl_15071_chr7 | hsa-miR-3074-3p   | -1.17 | 0.003837 | 2.43    | 1.05    | AAACATTGAGCTAACTGATTAATTTCTATAGCTAATTTT    | CTGATAT  | 15 | 6   | SEMA3D   | 1.52  | 0.00001 | 1.87   | 5.36  | -1.77 |
| cl_15138_chr7 | hsa-miR-148b-5p   | 1.23  | 0.012750 | 26.06   | 60.93   | TAGAAGCAGAAGTGTGAGTGTGCTTGTAGGCTCCAGAA     | CAGAACT  | 7  | 8   | CDK6     | -0.78 | 0.00077 | 81.25  | 47.26 | -0.96 |
| cl_15186_chr7 | hsa-miR-155-3p    | 1.63  | 0.003876 | 0.57    | 1.82    | CAAAATTTCTTTCATATTCTGATCTTTGTAGGATAGGTGT   | TGTAGGA  | 28 | 24  | LMTK2    | -0.37 | 0.03896 | 25.62  | 19.78 | -0.61 |
| cl_15664_chr7 | hsa-miR-484       | -1.26 | 0.000040 | 1404.88 | 587.88  | GGGCTATGAAGTGGAGCCTGTGGCTCGGAAATCACCTTTC   | GAGCCTG  | 14 | 10  | KIAA1147 | 0.90  | 0.00000 | 28.55  | 53.14 | -1.13 |
| cl_15777_chr7 | hsa-miR-3194-5p   | -1.19 | 0.004724 | 6.37    | 2.74    | GGGAGCGGCACCATCCGGGTGCTCGGTCGGCAAGGCTGA    | GGCTGGC  | 26 | 12  | SSPO     | 1.65  | 0.00000 | 0.77   | 2.42  | -1.97 |
| cl_1577_chr1  | hsa-miR-4767      | 1.69  | 0.000000 | 1.09    | 3.49    | CCTCCGCGCGCGCCGCCCTTCCGGCGCCACCCCGCC       | CGCCCGC  | 11 | 8   | SSX2IP   | -1.82 | 0.00000 | 44.04  | 12.47 | -3.07 |
| cl_15803_chr7 | hsa-miR-211-5p    | 4.32  | 0.000000 | 0.08    | 1.66    | CCACAAAGGGAGTGAGAAATTCGGGCTCAGGCACCCACCC   | AAAGGGA  | 5  | 9   | CDK5     | -0.71 | 0.00004 | 4.55   | 2.78  | -3.07 |
| cl_15803_chr7 | hsa-miR-342-5p    | 0.77  | 0.020518 | 31.43   | 53.35   | CCACAAAGGGAGTGAGAAATTCGGGCTCAGGCACCCACCC   | GCACCCC  | 31 | 9   | CDK5     | -0.71 | 0.00004 | 4.55   | 2.78  | -0.54 |
| cl_1588_chr1  | hsa-miR-1254      | -1.46 | 0.000090 | 5.06    | 1.83    | GTCCAGGCAAAGTTCTGAAGTGCCCCCTCGCCCTCACG     | TCCAGGC  | 2  | 12  | CYR61    | 0.85  | 0.03335 | 29.67  | 53.46 | -1.24 |
| cl_16066_chr8 | hsa-miR-577       | -1.72 | 0.000050 | 660.86  | 200.99  | GTATATGTTTATCTTTATTTTATAATATGCAAATACATTT   | TTTATCT  | 8  | 6   | MFHAS1   | 1.16  | 0.00014 | 37.05  | 82.57 | -1.99 |
| cl_16068_chr8 | hsa-miR-19a-3p    | -2.41 | 0.000000 | 1852.64 | 349.18  | CTTTCCTTTACTTTTCCACTTGGGTGTTTGCACGCTACA    | TTTGAC   | 29 | 16  | MFHAS1   | 1.16  | 0.00014 | 37.05  | 82.57 | -2.78 |
| cl_16068_chr8 | hsa-miR-19b-3p    | -1.82 | 0.000000 | 1655.38 | 468.75  | CTTTCCTTTACTTTTCCACTTGGGTGTTTGCACGCTACA    | TTTGAC   | 29 | 16  | MFHAS1   | 1.16  | 0.00014 | 37.05  | 82.57 | -2.10 |
| cl_16118_chr8 | hsa-miR-4677-3p   | 2.36  | 0.000008 | 6.84    | 35.21   | ATGTTCCACTGTCCGACGATTTGGGAATGAGACTCACAGTT  | CTCACAG  | 33 | 319 | FAM167A  | -3.14 | 0.00000 | 88.76  | 10.07 | -7.42 |
| cl_16255_chr8 | hsa-miR-130b-3p   | -2.24 | 0.000000 | 701.16  | 148.59  | CTGTATAAAGACGTAAGAATTTGCCTTGCACTTAACATGG   | TTGCACT  | 27 | 6   | NKX3-1   | 1.30  | 0.00018 | 0.69   | 1.70  | -2.90 |
| cl_16255_chr8 | hsa-miR-301a-3p   | -0.65 | 0.023052 | 241.53  | 153.73  | CTGTATAAAGACGTAAGAATTTGCCTTGCACTTAACATGG   | TTGCACT  | 27 | 6   | NKX3-1   | 1.30  | 0.00018 | 0.69   | 1.70  | -0.84 |
| cl_1636_chr1  | hsa-miR-21-3p     | 2.80  | 0.000301 | 738.25  | 5152.52 | ATTGACATGATATAGTTATCTGTGTTTTCTAAAATAACG    | TGGTGT   | 21 | 16  | ZNF326   | -0.57 | 0.00001 | 44.07  | 29.74 | -1.59 |
| cl_16674_chr8 | hsa-miR-361-3p    | 1.24  | 0.003876 | 615.76  | 1454.95 | CTCTGGGGGAGTATGGTGTGCTGACACATTAATTTTGGC    | CTGGGGG  | 3  | 11  | CLVS1    | -1.24 | 0.00000 | 112.18 | 47.60 | -1.53 |
| cl_1692_chr1  | hsa-miR-136-5p    | -1.04 | 0.012262 | 12.69   | 6.18    | CAGGAGAATGGAGAGTTGCTGGGTCTGGCATCTCCAAACA   | AATGGAG  | 7  | 11  | BCAR3    | 1.33  | 0.00000 | 10.91  | 27.41 | -1.38 |
| cl_17087_chr8 | hsa-miR-141-5p    | 2.49  | 0.037052 | 0.93    | 5.06    | TTTTGCATTAACAGGAAGATTGGAATGACTTGGCTGGAT    | GGAAGAT  | 14 | 37  | ZNF706   | -0.33 | 0.02365 | 66.99  | 53.22 | -0.83 |
| cl_17121_chr8 | hsa-miR-181b-3p   | -0.88 | 0.018103 | 19.40   | 10.56   | GTGAAGGTGACTGGCTCAGTGAAGGTGAGGCTGGTGGTGT   | TCAGTGA  | 17 | 24  | ZFPM2    | 0.94  | 0.00126 | 2.86   | 5.50  | -0.83 |
| cl_17121_chr8 | hsa-miR-4420      | -2.03 | 0.000161 | 9.58    | 2.34    | GTGAAGGTGACTGGCTCAGTGAAGGTGAGGCTGGTGGTGT   | TCAGTGA  | 17 | 24  | ZFPM2    | 0.94  | 0.00126 | 2.86   | 5.50  | -1.91 |
| cl_17188_chr8 | hsa-miR-3613-3p   | -0.59 | 0.049047 | 4.41    | 2.92    | TTCCAAAAGTTTATGATTTTTTCCCTAAACAATGTCAACTA  | TTTTTTG  | 16 | 17  | TRPS1    | 0.74  | 0.00456 | 10.91  | 18.23 | -0.44 |
| cl_17229_chr8 | hsa-miR-181b-3p   | -0.88 | 0.018103 | 19.40   | 10.56   | CAAACAATGTTTACTGGGCTGGTTCCTAATCAGTGAAGC    | TCAGTGA  | 32 | 13  | HAS2     | 0.93  | 0.00251 | 1.83   | 3.48  | -0.82 |



|                |                  |       |          |          |           |                                           |         |    |     |          |       |         |        |        |       |
|----------------|------------------|-------|----------|----------|-----------|-------------------------------------------|---------|----|-----|----------|-------|---------|--------|--------|-------|
| cl_17229_chr8  | hsa-miR-4420     | -2.03 | 0.000161 | 9.58     | 2.34      | CAAACAATGTTTACTGGGCTGGTTCCTAATCAGTGAAGC   | TCAGTGA | 32 | 13  | HAS2     | 0.93  | 0.00251 | 1.83   | 3.48   | -1.88 |
| cl_18089_chr9  | hsa-miR-766-3p   | 0.67  | 0.048792 | 39.23    | 62.52     | AAACCAACATGTATCGGGCTGGAGACCACACTACAGGCTT  | GCTGGAG | 19 | 12  | MAMDC2   | -0.61 | 0.00086 | 194.33 | 127.62 | -0.41 |
| cl_18144_chr9  | hsa-miR-3074-3p  | -1.17 | 0.003837 | 2.43     | 1.05      | GCAGGACGATCGTAAAGTCTGATATTGGGAAAGAAGCTCA  | CTGATAT | 20 | 16  | PCSK5    | 0.68  | 0.04373 | 3.84   | 6.17   | -0.80 |
| cl_1818_chr1   | hsa-miR-625-3p   | -0.95 | 0.012667 | 40.61    | 21.02     | AGCAATGTTGTCATGGTTCCTCTATAGTGATTCTGATGAAG | CTATAGT | 22 | 10  | NTNG1    | 1.17  | 0.02029 | 2.38   | 5.34   | -1.11 |
| cl_18339_chr9  | hsa-miR-708-5p   | 1.88  | 0.000003 | 14.78    | 54.47     | AGTACTCTCTTTGTCAAGTATATCAACCTACAGCTCCTGAA | AGTCCT  | 32 | 7   | IARS     | -0.91 | 0.00000 | 254.38 | 135.56 | -1.71 |
| cl_1833_chr1   | hsa-miR-3074-3p  | -1.17 | 0.003837 | 2.43     | 1.05      | GGCCTCAGTTTGTCAACTCTGATATTCTCTGATTCTAAA   | CTGATAT | 20 | 7   | VAV3     | 1.48  | 0.00000 | 12.77  | 35.63  | -1.73 |
| cl_18920_chr9  | hsa-miR-296-5p   | -1.00 | 0.001384 | 13.99    | 7.04      | GAGGCCCGGGGCCAGGGAGTGAGACCCTTGCTCTGACTT   | GGGGCCC | 8  | 33  | NTNG2    | 1.18  | 0.00012 | 3.25   | 7.38   | -1.18 |
| cl_18921_chr9  | hsa-miR-625-5p   | -1.31 | 0.000026 | 20.75    | 8.38      | TCCAGGGCTTCCCCCGGCTTACCTGCCGATGACCTCGATG  | TTCCCCC | 9  | 11  | NTNG2    | 1.18  | 0.00012 | 3.25   | 7.38   | -1.55 |
| cl_19276_chr10 | hsa-miR-345-5p   | 1.22  | 0.000700 | 68.98    | 161.32    | AGGCAGGCGAGTCAAGCCTGATGGTAGGAGTCACTGGAG   | GAGTCAG | 30 | 6   | CALML3   | -1.03 | 0.00496 | 2.45   | 1.20   | -1.26 |
| cl_19462_chr10 | hsa-miR-26a-5p   | 2.23  | 0.000003 | 6330.25  | 29697.53  | GTTGAGGAAAGGTGAAAAGTACATATTACTTGATTACTAT  | TACTTGA | 28 | 18  | CACNB2   | -0.93 | 0.00005 | 11.79  | 6.18   | -2.08 |
| cl_19462_chr10 | hsa-miR-26b-5p   | 0.84  | 0.010386 | 2601.75  | 4666.53   | GTTGAGGAAAGGTGAAAAGTACATATTACTTGATTACTAT  | TACTTGA | 28 | 18  | CACNB2   | -0.93 | 0.00005 | 11.79  | 6.18   | -0.78 |
| cl_20298_chr10 | hsa-miR-125a-5p  | 1.58  | 0.000340 | 2323.77  | 6956.82   | ACTACACTTACCGTAGAGGGTTAGCTCAGGGGTAGAGCAT  | CTCAGGG | 26 | 8   | SORBS1   | -2.10 | 0.00005 | 30.66  | 7.16   | -3.32 |
| cl_20300_chr10 | hsa-miR-30b-3p   | 1.06  | 0.009573 | 2.25     | 4.76      | GCATGGGGAAACAGTCCCATGATCCAATCACCTCCCATCA  | CCTCCA  | 32 | 20  | ALDH18A1 | -0.70 | 0.00001 | 99.05  | 60.80  | -0.75 |
| cl_20331_chr10 | hsa-miR-32-5p    | 1.83  | 0.000017 | 26.26    | 93.07     | GGAGTGCAGCAGTGAATCATAACTAGCGGGCTCAAGCA    | GTGCAAT | 12 | 10  | PGAM1    | -0.50 | 0.00440 | 112.17 | 79.32  | -0.91 |
| cl_20331_chr10 | hsa-miR-92b-3p   | 1.32  | 0.000295 | 726.65   | 1808.99   | GGAGTGCAGCAGTGAATCATAACTAGCGGGCTCAAGCA    | GTGCAAT | 12 | 10  | PGAM1    | -0.50 | 0.00440 | 112.17 | 79.32  | -0.66 |
| cl_20541_chr10 | hsa-miR-19a-3p   | -2.41 | 0.000000 | 1852.64  | 349.18    | CTTTGTTGGGAAGGTTCCCTTTGCACTGCCATGGAAGGCTG | TTTGAC  | 20 | 15  | TCF7L2   | 0.59  | 0.00878 | 6.18   | 9.27   | -1.41 |
| cl_20541_chr10 | hsa-miR-19b-3p   | -1.82 | 0.000000 | 1655.38  | 468.75    | CTTTGTTGGGAAGGTTCCCTTTGCACTGCCATGGAAGGCTG | TTTGAC  | 20 | 15  | TCF7L2   | 0.59  | 0.00878 | 6.18   | 9.27   | -1.07 |
| cl_20582_chr10 | hsa-miR-146a-5p  | 3.62  | 0.000000 | 9075.99  | 111335.84 | AGTTCTCCAGGTCCAACGATTACCTTCTGTTCCGGTCTCTG | AGTTCTC | 1  | 32  | TRUB1    | -0.29 | 0.02493 | 23.71  | 19.40  | -1.05 |
| cl_20582_chr10 | hsa-miR-146b-5p  | 1.74  | 0.002333 | 17080.92 | 57155.72  | AGTTCTCCAGGTCCAACGATTACCTTCTGTTCCGGTCTCTG | AGTTCTC | 1  | 32  | TRUB1    | -0.29 | 0.02493 | 23.71  | 19.40  | -0.50 |
| cl_20659_chr10 | hsa-miR-573      | -2.99 | 0.000000 | 3.34     | 0.42      | GCCCGTAGCAGTCACTTATGTTCTCTCGGTTCTAGCA     | CACTTCA | 14 | 5   | WDR11    | 0.71  | 0.00004 | 78.17  | 128.17 | -2.13 |
| cl_2098_chr1   | hsa-miR-339-5p   | -2.28 | 0.000000 | 98.79    | 20.26     | GGGGCTGGACAGGGCCAGGTTGGGAGAGGTGAGTGAACGA  | GACAGGG | 8  | 38  | PI4KB    | 0.43  | 0.00064 | 61.74  | 83.13  | -0.98 |
| cl_21060_chr11 | hsa-miR-149-5p   | -1.00 | 0.003123 | 13.82    | 6.89      | CGCAGCCCGGGCCAGCCACTGTTGGACCTGAGGAGCCAGC  | GAGCCAG | 34 | 50  | MIR4687  | 0.90  | 0.00003 | 0.52   | 0.98   | -0.90 |
| cl_2107_chr1   | hsa-miR-24-3p    | 2.33  | 0.000001 | 117.91   | 594.79    | TGAGAAGACCTCTGGAGGACTGAGCCGACTTCAGGATGAGG | CTGAGCC | 20 | 11  | CGN      | -1.42 | 0.00007 | 2.41   | 0.90   | -3.32 |
| cl_21169_chr11 | hsa-miR-136-5p   | -1.04 | 0.012262 | 12.69    | 6.18      | TCTCCACACTTTGATGTGAATGGAGGTAGGAACCCACAATA | AATGGAG | 19 | 16  | SBF2     | 0.44  | 0.00246 | 34.30  | 46.62  | -0.46 |
| cl_21249_chr11 | hsa-miR-30c-2-3p | 0.84  | 0.035995 | 5.28     | 9.42      | ATCTCCCAATAAAATTGAGATGGGCCAGACTGAAACACTT  | TCTCCA  | 2  | 5   | SOX6     | -0.74 | 0.00000 | 32.59  | 19.46  | -0.63 |
| cl_21406_chr11 | hsa-miR-339-5p   | -2.28 | 0.000000 | 98.79    | 20.26     | GTCAGGATGTTTACACCTTGACAGGGGGTGGCATGGCTG   | GACAGGG | 22 | 7   | FBXO3    | 0.69  | 0.00002 | 24.20  | 38.94  | -1.57 |
| cl_21409_chr11 | hsa-miR-5695     | -1.35 | 0.003064 | 1.44     | 0.54      | CTTGAGAGAGGAGCCTGGTATGACGCTAACACAGGACCTGA | CTTGGAG | 1  | 13  | ABTB2    | 0.61  | 0.00971 | 30.00  | 45.67  | -0.82 |
| cl_21638_chr11 | hsa-miR-500a-5p  | -0.95 | 0.004910 | 11.56    | 5.93      | TTTCTATAAACTGTGAGACTCAACTAACAGGATTCCCTC   | AAGGATT | 30 | 521 | MPEG1    | 1.34  | 0.00009 | 50.74  | 128.09 | -1.27 |
| cl_21772_chr11 | hsa-miR-4518     | -1.83 | 0.000964 | 8.95     | 2.49      | TCCAGCTTCTCTACACCTGAGAACCGCTGCCGAGAGAC    | CCCTGAG | 18 | 35  | GPR137   | 0.32  | 0.01822 | 35.18  | 43.96  | -0.59 |
| cl_22479_chr11 | hsa-miR-140-3p   | 0.74  | 0.009811 | 2206.05  | 3679.70   | GAAGGGGAGGCGGGGAATGCTCCGCGAGGGCTGTGGTGAC  | CTGTGGT | 32 | 9   | PPP2R1B  | -0.49 | 0.00153 | 59.54  | 42.38  | -0.36 |
| cl_22480_chr11 | hsa-miR-4424     | 3.24  | 0.000289 | 2.58     | 24.40     | CCACAGTACTGTTTTGATATTAACCTAAGCTTAAGAGAGC  | TAACTC  | 21 | 22  | PPP2R1B  | -0.49 | 0.00153 | 59.54  | 42.38  | -1.59 |
| cl_22884_chr11 | hsa-miR-2110     | 1.05  | 0.000723 | 2.94     | 6.19      | TGTTCCCACTTCTACTGTCTGATGTTCAAATAGCTCAGAA  | TTCCCA  | 3  | 5   | NCAPD3   | -0.62 | 0.00291 | 114.08 | 74.19  | -0.65 |
| cl_22896_chr11 | hsa-miR-145-5p   | -1.46 | 0.002408 | 414.75   | 150.53    | TTAGCAACTGGAGTTACCATAGGGCTCTCGAAGATGAAG   | AACTGGA | 6  | 18  | B3GAT1   | 2.36  | 0.00000 | 1.14   | 5.82   | -3.45 |
| cl_22969_chr12 | hsa-miR-125a-5p  | 1.58  | 0.000340 | 2323.77  | 6956.82   | CCCTGCTTAGCTGAGTGTATGCGGGGAGACTCAGGGGTCC  | CTCAGGG | 31 | 30  | EFCAB4B  | -0.41 | 0.00478 | 38.12  | 28.59  | -0.66 |
| cl_22969_chr12 | hsa-miR-425-5p   | 1.28  | 0.007710 | 562.69   | 1362.90   | CCCTGCTTAGCTGAGTGTATGCGGGGAGACTCAGGGGTCC  | GTGTCAT | 15 | 30  | EFCAB4B  | -0.41 | 0.00478 | 38.12  | 28.59  | -0.53 |

|                |                   |       |          |         |          |                                           |         |    |       |         |       |         |        |        |       |
|----------------|-------------------|-------|----------|---------|----------|-------------------------------------------|---------|----|-------|---------|-------|---------|--------|--------|-------|
| cl_22970_chr12 | hsa-miR-196a-5p   | 3.97  | 0.000000 | 0.79    | 12.42    | TCCAGGAATCTCTTAGCAACTACCTCTTAATTAGCAAAAGC | ACTACCT | 19 | 23    | EFCAB4B | -0.41 | 0.00478 | 38.12  | 28.59  | -1.65 |
| cl_22970_chr12 | hsa-miR-196b-5p   | 3.59  | 0.000000 | 4.45    | 53.68    | TCCAGGAATCTCTTAGCAACTACCTCTTAATTAGCAAAAGC | ACTACCT | 19 | 23    | EFCAB4B | -0.41 | 0.00478 | 38.12  | 28.59  | -1.49 |
| cl_22970_chr12 | hsa-let-7a-5p     | 1.81  | 0.000004 | 5051.85 | 17753.96 | TCCAGGAATCTCTTAGCAACTACCTCTTAATTAGCAAAAGC | CTACCTC | 20 | 23    | EFCAB4B | -0.41 | 0.00478 | 38.12  | 28.59  | -0.75 |
| cl_22970_chr12 | hsa-let-7b-5p     | 1.71  | 0.000000 | 786.57  | 2572.37  | TCCAGGAATCTCTTAGCAACTACCTCTTAATTAGCAAAAGC | CTACCTC | 20 | 23    | EFCAB4B | -0.41 | 0.00478 | 38.12  | 28.59  | -0.71 |
| cl_22970_chr12 | hsa-let-7e-5p     | 1.57  | 0.000051 | 350.23  | 1042.74  | TCCAGGAATCTCTTAGCAACTACCTCTTAATTAGCAAAAGC | CTACCTC | 20 | 23    | EFCAB4B | -0.41 | 0.00478 | 38.12  | 28.59  | -0.65 |
| cl_22970_chr12 | hsa-let-7f-5p     | 1.13  | 0.000287 | 8944.06 | 19581.46 | TCCAGGAATCTCTTAGCAACTACCTCTTAATTAGCAAAAGC | CTACCTC | 20 | 23    | EFCAB4B | -0.41 | 0.00478 | 38.12  | 28.59  | -0.47 |
| cl_22970_chr12 | hsa-let-7g-5p     | 1.85  | 0.000001 | 5123.47 | 18520.87 | TCCAGGAATCTCTTAGCAACTACCTCTTAATTAGCAAAAGC | CTACCTC | 20 | 23    | EFCAB4B | -0.41 | 0.00478 | 38.12  | 28.59  | -0.77 |
| cl_22970_chr12 | hsa-let-7i-5p     | 1.16  | 0.000505 | 4537.30 | 10130.51 | TCCAGGAATCTCTTAGCAACTACCTCTTAATTAGCAAAAGC | CTACCTC | 20 | 23    | EFCAB4B | -0.41 | 0.00478 | 38.12  | 28.59  | -0.48 |
| cl_2335_chr1   | hsa-miR-145-5p    | -1.46 | 0.002408 | 414.75  | 150.53   | GTTCTAATATTAGACTGTGGTGATGGTTGCCAAGTGGATA  | AACTGGA | 33 | 22    | VANGL2  | 0.75  | 0.02619 | 8.00   | 13.45  | -1.09 |
| cl_23621_chr12 | hsa-miR-17-3p     | -2.96 | 0.000000 | 2176.96 | 279.17   | GCAGTGGCCTGATCTTGATCTTGCTCAGTGCAGACTTAGC  | ACTGCAG | 28 | 5     | SUOX    | 1.26  | 0.00000 | 4.16   | 9.98   | -3.74 |
| cl_23668_chr12 | hsa-miR-432-5p    | -1.20 | 0.006297 | 9.90    | 4.31     | TAAACGTGGCTCAAGGTCTGGGGAGGTGGATCAGACGA    | CTCCAAG | 10 | 20    | OS9     | 0.50  | 0.00014 | 180.32 | 255.15 | -0.60 |
| cl_23684_chr12 | hsa-miR-3074-3p   | -1.17 | 0.003837 | 2.43    | 1.05     | TTTGCTATTCCCTGATGACTGATATTCAACTCAGTGTGT   | CTGATAT | 20 | 19    | LRIG3   | 1.17  | 0.00027 | 2.88   | 6.49   | -1.37 |
| cl_23780_chr12 | hsa-miR-361-3p    | 1.24  | 0.003876 | 615.76  | 1454.95  | CGTGGCAACCGGCTCCGGGATGGCTGGCTGGGGGCTAGT   | CTGGGGG | 28 | 10805 | MDM2    | -1.40 | 0.00000 | 216.24 | 82.20  | -1.73 |
| cl_23786_chr12 | hsa-miR-4645-3p   | 0.66  | 0.038686 | 3.63    | 5.68     | TGACCAATCGTACTGTCAATTGATGTCCACTAGTTGTTAAT | TACTGTC | 11 | 126   | CCT2    | -1.17 | 0.00000 | 389.18 | 172.41 | -0.77 |
| cl_24053_chr12 | hsa-miR-424-5p    | -1.81 | 0.000003 | 177.32  | 50.51    | GACACTCTTCTATCCCCATTGCTGCTTACTTTCTCCAC    | TGCTGCT | 22 | 14    | GNPTAB  | 0.54  | 0.00388 | 46.50  | 67.40  | -0.97 |
| cl_24055_chr12 | hsa-miR-4517      | -1.60 | 0.000287 | 5.06    | 1.68     | TTTAAATATTGTAGATATTTGGAAACATATCTCATATTA   | TCATATT | 33 | 9     | CCDC53  | 0.75  | 0.00000 | 17.46  | 29.42  | -1.20 |
| cl_24210_chr12 | hsa-miR-103a-2-5p | -1.50 | 0.000002 | 5.75    | 2.00     | TGATAAGAAGCACTGGCCCTCATGGTGGTGGAGTGATGCTG | AAGAAGC | 5  | 22    | FAM109A | 0.46  | 0.04725 | 2.17   | 2.99   | -0.69 |
| cl_24245_chr12 | hsa-miR-374b-3p   | 0.94  | 0.035995 | 6.48    | 12.41    | ATAGAGGCTGCTGGAGAGCTGACTAGGACTCTGCTAAG    | CTGCTAA | 34 | 9     | DTX1    | -1.04 | 0.00004 | 254.75 | 124.22 | -0.97 |
| cl_2463_chr1   | hsa-miR-130b-5p   | -2.01 | 0.000006 | 211.10  | 52.39    | AAGAGTCAGCTGGGACATATGAGAAAGAGATGCCGGTCTC  | GAAAGAG | 24 | 7     | SELE    | 2.01  | 0.00004 | 1.80   | 7.29   | -4.05 |
| cl_24646_chr12 | hsa-miR-32-5p     | 1.83  | 0.000017 | 26.26   | 93.07    | TGCCCTGGTCTCTCTGTTGTGCAATGGGCACCTTTCATCA  | GTGCAAT | 20 | 7     | POLE    | -1.38 | 0.00000 | 195.30 | 75.17  | -2.52 |
| cl_24646_chr12 | hsa-miR-92b-3p    | 1.32  | 0.000295 | 726.65  | 1808.99  | TGCCCTGGTCTCTCTGTTGTGCAATGGGCACCTTTCATCA  | GTGCAAT | 20 | 7     | POLE    | -1.38 | 0.00000 | 195.30 | 75.17  | -1.81 |
| cl_24755_chr13 | hsa-miR-132-3p    | -0.85 | 0.002610 | 123.76  | 68.55    | TTTGAGACTGTTCTACAGTCTGACGGCATGAACATCAACGC | GACTGTT | 6  | 67    | ATP8A2  | 0.66  | 0.00865 | 2.60   | 4.12   | -0.56 |
| cl_24759_chr13 | hsa-miR-543       | -2.84 | 0.000000 | 7.68    | 1.04     | GCTTCACACAGCAGGGGTTATATAACAAGAATGTTCAAAAG | GAATGTT | 28 | 6     | ATP8A2  | 0.66  | 0.00865 | 2.60   | 4.12   | -1.88 |
| cl_24771_chr13 | hsa-miR-361-3p    | 1.24  | 0.003876 | 615.76  | 1454.95  | CGAGGGACGAGGGCTGGGGGTGGGGAGCGGTGCTCTGCC   | CTGGGGG | 14 | 164   | CDK8    | -0.53 | 0.00034 | 17.74  | 12.31  | -0.65 |
| cl_24948_chr13 | hsa-miR-485-5p    | -1.88 | 0.001384 | 12.78   | 3.45     | AGCTGGTGCCAGACCCAGCCTCCTGAAGGAACCATGCTCTG | CAGCCTC | 16 | 13    | EPST11  | 0.90  | 0.00154 | 27.57  | 51.35  | -1.68 |
| cl_24969_chr13 | hsa-miR-188-3p    | 1.50  | 0.002747 | 0.97    | 2.82     | GGCCCGGGTTCGACTCCCGGTGGGAAACGCCGAAATTTTA  | TGTGGGA | 21 | 14    | NUFIP1  | -1.22 | 0.00000 | 8.37   | 3.59   | -1.84 |
| cl_24996_chr13 | hsa-miR-455-3p    | 1.26  | 0.000225 | 16.17   | 38.86    | AGAAATCCACATGTGTGGACTGGCCATTCTACAGAGGAGA  | TGGACTG | 16 | 14    | SUCLA2  | -0.62 | 0.00000 | 32.98  | 21.47  | -0.78 |
| cl_25135_chr13 | hsa-let-7a-5p     | 1.81  | 0.000004 | 5051.85 | 17753.96 | TGATTCAGGAAGTCTACCTCTGACGATCTTAGAAACCTGAA | CTACCTC | 14 | 9     | PCDH9   | -1.94 | 0.00004 | 56.58  | 14.70  | -3.52 |
| cl_25135_chr13 | hsa-let-7b-5p     | 1.71  | 0.000000 | 786.57  | 2572.37  | TGATTCAGGAAGTCTACCTCTGACGATCTTAGAAACCTGAA | CTACCTC | 14 | 9     | PCDH9   | -1.94 | 0.00004 | 56.58  | 14.70  | -3.32 |
| cl_25135_chr13 | hsa-let-7e-5p     | 1.57  | 0.000051 | 350.23  | 1042.74  | TGATTCAGGAAGTCTACCTCTGACGATCTTAGAAACCTGAA | CTACCTC | 14 | 9     | PCDH9   | -1.94 | 0.00004 | 56.58  | 14.70  | -3.06 |
| cl_25135_chr13 | hsa-let-7f-5p     | 1.13  | 0.000287 | 8944.06 | 19581.46 | TGATTCAGGAAGTCTACCTCTGACGATCTTAGAAACCTGAA | CTACCTC | 14 | 9     | PCDH9   | -1.94 | 0.00004 | 56.58  | 14.70  | -2.20 |
| cl_25135_chr13 | hsa-let-7g-5p     | 1.85  | 0.000001 | 5123.47 | 18520.87 | TGATTCAGGAAGTCTACCTCTGACGATCTTAGAAACCTGAA | CTACCTC | 14 | 9     | PCDH9   | -1.94 | 0.00004 | 56.58  | 14.70  | -3.60 |
| cl_25135_chr13 | hsa-let-7i-5p     | 1.16  | 0.000505 | 4537.30 | 10130.51 | TGATTCAGGAAGTCTACCTCTGACGATCTTAGAAACCTGAA | CTACCTC | 14 | 9     | PCDH9   | -1.94 | 0.00004 | 56.58  | 14.70  | -2.25 |
| cl_25164_chr13 | hsa-miR-3136-5p   | 1.49  | 0.009911 | 0.81    | 2.26     | TTCTTCAATCAAATTCAGTCAATAGCCCAAGACTGATAG   | TCAGTCA | 17 | 31    | DACH1   | -0.85 | 0.00000 | 15.77  | 8.78   | -1.26 |
| cl_25188_chr13 | hsa-miR-140-3p    | 0.74  | 0.009811 | 2206.05 | 3679.70  | AATCAAGTCTAGAGTCCAATGATCTTAATCACTGTGGTGT  | CTGTGGT | 33 | 19    | UCLH3   | -0.93 | 0.00000 | 41.29  | 21.64  | -0.69 |

|                |                  |       |          |          |           |                                               |         |    |     |          |       |         |        |        |       |
|----------------|------------------|-------|----------|----------|-----------|-----------------------------------------------|---------|----|-----|----------|-------|---------|--------|--------|-------|
| cl_25372_chr13 | hsa-miR-106a-5p  | -1.48 | 0.000168 | 35.65    | 12.76     | TCATTGGGCACCTTTCCCATCTCCAACCTCGGAAGTAAGCCCA   | GCACTTT | 8  | 17  | GPR183   | 1.96  | 0.00000 | 8.88   | 34.59  | -2.90 |
| cl_25372_chr13 | hsa-miR-106b-5p  | -1.55 | 0.000000 | 617.66   | 211.04    | TCATTGGGCACCTTTCCCATCTCCAACCTCGGAAGTAAGCCCA   | GCACTTT | 8  | 17  | GPR183   | 1.96  | 0.00000 | 8.88   | 34.59  | -3.04 |
| cl_25372_chr13 | hsa-miR-17-5p    | -1.37 | 0.000088 | 1233.06  | 477.71    | TCATTGGGCACCTTTCCCATCTCCAACCTCGGAAGTAAGCCCA   | GCACTTT | 8  | 17  | GPR183   | 1.96  | 0.00000 | 8.88   | 34.59  | -2.68 |
| cl_25372_chr13 | hsa-miR-20b-5p   | -1.12 | 0.042021 | 59.74    | 27.49     | TCATTGGGCACCTTTCCCATCTCCAACCTCGGAAGTAAGCCCA   | GCACTTT | 8  | 17  | GPR183   | 1.96  | 0.00000 | 8.88   | 34.59  | -2.19 |
| cl_25372_chr13 | hsa-miR-93-5p    | -1.06 | 0.001859 | 2255.60  | 1081.01   | TCATTGGGCACCTTTCCCATCTCCAACCTCGGAAGTAAGCCCA   | GCACTTT | 8  | 17  | GPR183   | 1.96  | 0.00000 | 8.88   | 34.59  | -2.08 |
| cl_25522_chr13 | hsa-miR-221-5p   | 1.18  | 0.015984 | 188.23   | 426.85    | AGAGATGCCCACTCAACCCCTTACTACTATGCCAGGCCTCA     | TGCCAGG | 30 | 11  | TUBGCP3  | -0.56 | 0.00001 | 60.04  | 40.60  | -0.67 |
| cl_25995_chr14 | hsa-miR-193b-5p  | -1.17 | 0.019368 | 21.00    | 9.29      | TTTTAAACCCCTATTAGCTATAGGCCACGATCCAGAGTTC      | AAACCCC | 5  | 33  | RTN1     | 1.10  | 0.00002 | 4.16   | 8.93   | -1.29 |
| cl_2620_chr1   | hsa-miR-500a-5p  | -0.95 | 0.004910 | 11.56    | 5.93      | TAAACCAAGGATTCTAACATGTGCTTCTTCTCCAAACT        | AAGGATT | 8  | 5   | RGL1     | 1.19  | 0.00001 | 21.15  | 48.33  | -1.14 |
| cl_26797_chr15 | hsa-miR-2467-5p  | 1.46  | 0.003890 | 3.95     | 10.85     | GGCGGGCCAGCGCCGCGGAGTTTCGGGTCCGAGGAGCCTCG     | GAGCCTC | 34 | 6   | TJP1     | -1.07 | 0.00000 | 136.54 | 64.81  | -1.57 |
| cl_26985_chr15 | hsa-miR-146a-5p  | 3.62  | 0.000000 | 9075.99  | 111335.84 | CTCAGTTCTCCAGTACGACGTTTCCTGTCTTGAGCAGGAGC     | AGTTCTC | 4  | 8   | STARD9   | -0.49 | 0.00438 | 20.47  | 14.60  | -1.76 |
| cl_26985_chr15 | hsa-miR-146b-5p  | 1.74  | 0.002333 | 17080.92 | 57155.72  | CTCAGTTCTCCAGTACGACGTTTCCTGTCTTGAGCAGGAGC     | AGTTCTC | 4  | 8   | STARD9   | -0.49 | 0.00438 | 20.47  | 14.60  | -0.85 |
| cl_27858_chr15 | hsa-miR-4518     | -1.83 | 0.000964 | 8.95     | 2.49      | ACAGTGAATGCACCTTCTCTGCCTGGCCCTGAGAGACACA      | CCCTGAG | 28 | 26  | PCSK6    | 0.73  | 0.01602 | 4.60   | 7.62   | -1.33 |
| cl_27858_chr15 | hsa-miR-4755-3p  | -1.99 | 0.000050 | 2.99     | 0.74      | ACAGTGAATGCACCTTCTCTGCCTGGCCCTGAGAGACACA      | GCCTGGC | 22 | 26  | PCSK6    | 0.73  | 0.01602 | 4.60   | 7.62   | -1.45 |
| cl_2788_chr1   | hsa-miR-641      | -0.72 | 0.009573 | 7.16     | 4.36      | ATGTCTTGATAAGATACAACCTGACACCGAGTACTGCCAG      | ATGTCTT | 1  | 5   | CYB5R1   | 0.68  | 0.00000 | 17.17  | 27.48  | -0.49 |
| cl_28500_chr16 | hsa-miR-3681-5p  | 5.07  | 0.000000 | 1.82     | 61.30     | CGTTCTCTCTGAATCCACTGCCAGCCCGCCCTCTG           | ATCCACT | 15 | 7   | ALDOA    | -0.42 | 0.02659 | 639.84 | 477.09 | -2.15 |
| cl_28675_chr16 | hsa-miR-17-3p    | -2.96 | 0.000000 | 2176.96  | 279.17    | GTGTTACAGAGCTCAGTCCGATGTCTCCTCACTGCAGCACC     | ACTGCAG | 31 | 31  | N4BP1    | 0.30  | 0.03307 | 36.42  | 44.74  | -0.88 |
| cl_28808_chr16 | hsa-miR-3065-3p  | -1.21 | 0.004663 | 1.20     | 0.49      | TGCAGCGGGAGGACACAGTGTACCGGGTGTGGGTGCCAC       | GGTGCTG | 26 | 19  | MT2A     | 1.57  | 0.00206 | 5.01   | 14.92  | -1.91 |
| cl_28898_chr16 | hsa-miR-193b-5p  | -1.17 | 0.019368 | 21.00    | 9.29      | GATATGTATTAACCCCTCTGTGTACAGTACTGGCATG         | AAACCCC | 11 | 6   | CDH11    | 1.01  | 0.00147 | 18.33  | 37.01  | -1.19 |
| cl_29152_chr16 | hsa-miR-378a-3p  | -1.54 | 0.000000 | 2405.55  | 827.87    | CTTTCAGTCCAGCATCTGAGTGTGGCAACCAGCCAGAGA       | AGTCCAG | 6  | 7   | MAF      | 2.02  | 0.00000 | 13.35  | 54.02  | -3.10 |
| cl_29152_chr16 | hsa-miR-378c     | -1.27 | 0.000000 | 300.43   | 124.57    | CTTTCAGTCCAGCATCTGAGTGTGGCAACCAGCCAGAGA       | AGTCCAG | 6  | 7   | MAF      | 2.02  | 0.00000 | 13.35  | 54.02  | -2.56 |
| cl_29152_chr16 | hsa-miR-378d     | -1.10 | 0.003182 | 14.73    | 6.83      | CTTTCAGTCCAGCATCTGAGTGTGGCAACCAGCCAGAGA       | AGTCCAG | 6  | 7   | MAF      | 2.02  | 0.00000 | 13.35  | 54.02  | -2.22 |
| cl_29152_chr16 | hsa-miR-378i     | -2.12 | 0.000031 | 7.69     | 1.78      | CTTTCAGTCCAGCATCTGAGTGTGGCAACCAGCCAGAGA       | AGTCCAG | 6  | 7   | MAF      | 2.02  | 0.00000 | 13.35  | 54.02  | -4.28 |
| cl_29630_chr17 | hsa-miR-150-3p   | 3.38  | 0.000000 | 3.49     | 36.47     | GCGGGCATGAGGAGTGACTGTGACATTTCAGTCTTTCT        | TGTACCA | 21 | 59  | DHX33    | -1.13 | 0.00000 | 43.83  | 20.04  | -3.82 |
| cl_30152_chr17 | hsa-miR-125a-5p  | 1.58  | 0.000340 | 2323.77  | 6956.82   | TGATCTCAGGGTCGGAATCCTGCTGTCTCGTCTGCTACTAA     | CTCAGGG | 5  | 18  | DUSP14   | -0.76 | 0.00001 | 8.12   | 4.81   | -1.20 |
| cl_30152_chr17 | hsa-miR-4524a-3p | 1.13  | 0.047890 | 0.62     | 1.40      | TGATCTCAGGGTCGGAATCCTGCTGTCTCGTCTGCTACTAA     | CTGTCTC | 23 | 18  | DUSP14   | -0.76 | 0.00001 | 8.12   | 4.81   | -0.85 |
| cl_30161_chr17 | hsa-miR-3922-3p  | 1.24  | 0.017898 | 0.75     | 1.82      | ACATAGTCTTCGGACCTTGCGGATGTGCAGGCCAGGAAA       | AGGCCAG | 31 | 7   | DDX52    | -0.33 | 0.01578 | 39.68  | 31.61  | -0.41 |
| cl_30161_chr17 | hsa-miR-188-3p   | 1.50  | 0.002747 | 0.97     | 2.82      | ACATAGTCTTCGGACCTTGCGGATGTGCAGGCCAGGAAA       | TGTGGGA | 19 | 7   | DDX52    | -0.33 | 0.01578 | 39.68  | 31.61  | -0.49 |
| cl_30345_chr17 | hsa-miR-221-5p   | 1.18  | 0.015984 | 188.23   | 426.85    | GTCCCTGCTTTAGAGGTCATTGCCAGGGTTGTGAGGCAAC      | TGCCAGG | 21 | 141 | SLC25A39 | -0.73 | 0.00001 | 178.71 | 107.89 | -0.86 |
| cl_30539_chr17 | hsa-miR-9-3p     | 2.32  | 0.000225 | 2.29     | 11.53     | TGTAATAACTCAAACCTCAGTGGTGTGAGCTTACGAGCAAGGTGA | AGCTTTA | 23 | 18  | UTP18    | -0.71 | 0.00000 | 39.62  | 24.26  | -1.64 |
| cl_30574_chr17 | hsa-miR-339-5p   | -2.28 | 0.000000 | 98.79    | 20.26     | CCTGCGCTAGTCCAGAGCTTGAGACAGGGTCCGGGCGGAG      | GACAGGG | 24 | 12  | PCTP     | 0.83  | 0.00003 | 7.20   | 12.81  | -1.90 |
| cl_30576_chr17 | hsa-miR-369-3p   | -1.14 | 0.016758 | 3.61     | 1.65      | TAAACTAATAGTCACTAGTTGAGTGATTATGCCITTTAC       | GTATTAT | 26 | 19  | PCTP     | 0.83  | 0.00003 | 7.20   | 12.81  | -0.95 |
| cl_3082_chr1   | hsa-miR-708-3p   | 0.98  | 0.026809 | 18.72    | 36.79     | GCTTTAAGTTAACTCTGGGTTTACTAGTTTGACATTT         | TCTAGTT | 27 | 9   | ENAH     | -0.92 | 0.00244 | 22.95  | 12.12  | -0.90 |
| cl_31019_chr17 | hsa-miR-654-5p   | -1.68 | 0.000699 | 4.43     | 1.38      | CCGGCCACCGTGGCACCCCTGACGATCGCGGGGTGGGGTA      | GCCACC  | 4  | 28  | CANT1    | 0.35  | 0.00595 | 29.56  | 37.64  | -0.58 |
| cl_31353_chr18 | hsa-miR-141-5p   | 2.49  | 0.037052 | 0.93     | 5.06      | GGGAAGATAAAACAGCACGTGTAATGTAATACATGACAAAT     | GGAAGAT | 2  | 48  | IMPA2    | -1.29 | 0.00000 | 27.80  | 11.37  | -3.21 |
| cl_31452_chr18 | hsa-miR-331-3p   | -0.86 | 0.033410 | 175.92   | 96.56     | TCTTCATTTACAGCTTGGTTGGCTCATCTCATCCAGGGGC      | CCAGGGG | 34 | 20  | TTC39C   | 0.63  | 0.02164 | 15.98  | 24.73  | -0.55 |

|                |                   |       |          |         |          |                                           |         |    |     |          |       |         |        |        |       |
|----------------|-------------------|-------|----------|---------|----------|-------------------------------------------|---------|----|-----|----------|-------|---------|--------|--------|-------|
| cl_31497_chr18 | hsa-miR-132-3p    | -0.85 | 0.002610 | 123.76  | 68.55    | ATCCGACTGTTTATTTAAATTTCTTAGTGTCTGTTTTAT   | GACTGTT | 5  | 86  | CDH2     | 1.90  | 0.00001 | 1.68   | 6.29   | -1.62 |
| cl_31497_chr18 | hsa-miR-589-3p    | -1.73 | 0.000002 | 17.95   | 5.34     | ATCCGACTGTTTATTTAAATTTCTTAGTGTCTGTTTTAT   | TGTTCTG | 29 | 86  | CDH2     | 1.90  | 0.00001 | 1.68   | 6.29   | -3.29 |
| cl_31909_chr18 | hsa-miR-136-5p    | -1.04 | 0.012262 | 12.69   | 6.18     | CAATGGAGAAGGTAACCTGGCTGATCTCTTTTTTACACCG  | AATGGAG | 2  | 30  | TMX3     | 0.69  | 0.00002 | 56.28  | 90.99  | -0.72 |
| cl_32186_chr19 | hsa-miR-30b-3p    | 1.06  | 0.009573 | 2.25    | 4.76     | CGACCCCCCTCACCGTCCATCCCTCCACGCGCCGAGCGC   | CCTCCA  | 23 | 55  | TCF3     | -1.95 | 0.00000 | 817.43 | 212.00 | -2.06 |
| cl_32221_chr19 | hsa-miR-3194-5p   | -1.19 | 0.004724 | 6.37    | 2.74     | TGGGCTGGCTGGCGGGCATGTCTGTCCAGGAGGCACGCC   | GGTGGC  | 7  | 9   | MKNK2    | 0.75  | 0.00009 | 166.70 | 280.11 | -0.89 |
| cl_32453_chr19 | hsa-miR-2355-5p   | 0.92  | 0.009772 | 10.03   | 18.95    | AGAAGACGTTCTCGCTCCATTTCTGGGAAAGAGCCGTAA   | CTGGGGA | 24 | 23  | ARHGEF18 | -0.53 | 0.00697 | 136.44 | 94.54  | -0.48 |
| cl_32503_chr19 | hsa-miR-15b-3p    | -0.95 | 0.002065 | 65.01   | 33.63    | TTCTGATGATTCTGCCAGGATGGGGGAAGTAGGGAACCTAA | ATGATTC | 6  | 6   | MUC16    | 4.94  | 0.00000 | 1.27   | 39.08  | -4.71 |
| cl_32567_chr19 | hsa-miR-615-3p    | 2.51  | 0.000000 | 2.50    | 14.25    | CTGTGGAGCTTACTCTGGCTCGGTGAAGAGACATGGGTGA  | GGTCTCG | 18 | 5   | ILF3     | -1.17 | 0.00000 | 878.29 | 389.71 | -2.94 |
| cl_32696_chr19 | hsa-miR-2110      | 1.05  | 0.000723 | 2.94    | 6.19     | GAGGTTCCCCACGCGGAAATGGGGCTTGAGGGGGTTAAT   | TTCCCA  | 5  | 13  | ASF1B    | -1.54 | 0.00000 | 79.93  | 27.42  | -1.63 |
| cl_32878_chr19 | hsa-miR-3648      | -1.65 | 0.002386 | 7.08    | 2.27     | AGGCCACGCCCGAAGAGGTACGCCGGCCAGATTGCCG     | CCGCGGC | 25 | 8   | LPAR2    | 0.71  | 0.00100 | 11.55  | 18.85  | -1.17 |
| cl_33115_chr19 | hsa-miR-138-5p    | 1.70  | 0.013928 | 24.26   | 78.83    | CCTCCAGCTGAGACCGCGGTGTTATTTCCACACCAGCATA  | CACCAGC | 32 | 16  | UBA2     | -1.08 | 0.00000 | 124.66 | 58.78  | -1.84 |
| cl_33453_chr19 | hsa-miR-1260a     | 1.07  | 0.037052 | 1.66    | 3.50     | ACAAAGGGGTGATCCGGGTGGGAAGAGCTTCAGATCATA   | GGTGGGA | 19 | 11  | QPCTL    | -0.58 | 0.00098 | 16.77  | 11.21  | -0.62 |
| cl_34052_chr20 | hsa-miR-125a-5p   | 1.58  | 0.000340 | 2323.77 | 6956.82  | GGTACAGCTCAGGGTAGAGTATTTGACTTCAGAAAATGTC  | CTCAGGG | 8  | 32  | PLCB1    | -1.77 | 0.00000 | 20.06  | 5.88   | -2.80 |
| cl_34100_chr20 | hsa-miR-3065-3p   | -1.21 | 0.004663 | 1.20    | 0.49     | CTTACTTAGTGACGGATAGTGCAGGAAGGTGCTGCCTCA   | GGTGCTG | 29 | 9   | MACROD2  | 1.25  | 0.00036 | 18.21  | 43.26  | -1.51 |
| cl_3470_chr2   | hsa-miR-196a-5p   | 3.97  | 0.000000 | 0.79    | 12.42    | TAATGCTGATTTTTAAAACTACCTCTAAAGTCTGTGTG    | ACTACCT | 19 | 10  | TSSC1    | -0.30 | 0.03658 | 44.10  | 35.74  | -1.20 |
| cl_3470_chr2   | hsa-miR-196b-5p   | 3.59  | 0.000000 | 4.45    | 53.68    | TAATGCTGATTTTTAAAACTACCTCTAAAGTCTGTGTG    | ACTACCT | 19 | 10  | TSSC1    | -0.30 | 0.03658 | 44.10  | 35.74  | -1.09 |
| cl_3470_chr2   | hsa-let-7a-5p     | 1.81  | 0.000004 | 5051.85 | 17753.96 | TAATGCTGATTTTTAAAACTACCTCTAAAGTCTGTGTG    | CTACCTC | 20 | 10  | TSSC1    | -0.30 | 0.03658 | 44.10  | 35.74  | -0.55 |
| cl_3470_chr2   | hsa-let-7b-5p     | 1.71  | 0.000000 | 786.57  | 2572.37  | TAATGCTGATTTTTAAAACTACCTCTAAAGTCTGTGTG    | CTACCTC | 20 | 10  | TSSC1    | -0.30 | 0.03658 | 44.10  | 35.74  | -0.52 |
| cl_3470_chr2   | hsa-let-7d-5p     | 0.97  | 0.003359 | 541.68  | 1061.17  | TAATGCTGATTTTTAAAACTACCTCTAAAGTCTGTGTG    | CTACCTC | 20 | 10  | TSSC1    | -0.30 | 0.03658 | 44.10  | 35.74  | -0.29 |
| cl_3470_chr2   | hsa-let-7e-5p     | 1.57  | 0.000051 | 350.23  | 1042.74  | TAATGCTGATTTTTAAAACTACCTCTAAAGTCTGTGTG    | CTACCTC | 20 | 10  | TSSC1    | -0.30 | 0.03658 | 44.10  | 35.74  | -0.48 |
| cl_3470_chr2   | hsa-let-7f-5p     | 1.13  | 0.000287 | 8944.06 | 19581.46 | TAATGCTGATTTTTAAAACTACCTCTAAAGTCTGTGTG    | CTACCTC | 20 | 10  | TSSC1    | -0.30 | 0.03658 | 44.10  | 35.74  | -0.34 |
| cl_3470_chr2   | hsa-let-7g-5p     | 1.85  | 0.000001 | 5123.47 | 18520.87 | TAATGCTGATTTTTAAAACTACCTCTAAAGTCTGTGTG    | CTACCTC | 20 | 10  | TSSC1    | -0.30 | 0.03658 | 44.10  | 35.74  | -0.56 |
| cl_3470_chr2   | hsa-let-7i-5p     | 1.16  | 0.000505 | 4537.30 | 10130.51 | TAATGCTGATTTTTAAAACTACCTCTAAAGTCTGTGTG    | CTACCTC | 20 | 10  | TSSC1    | -0.30 | 0.03658 | 44.10  | 35.74  | -0.35 |
| cl_3470_chr2   | hsa-miR-34a-3p    | 0.99  | 0.002408 | 1.08    | 2.19     | TAATGCTGATTTTTAAAACTACCTCTAAAGTCTGTGTG    | GCTGATT | 5  | 10  | TSSC1    | -0.30 | 0.03658 | 44.10  | 35.74  | -0.30 |
| cl_35051_chr21 | hsa-miR-132-3p    | -0.85 | 0.002610 | 123.76  | 68.55    | TGATCATTTAGGGTGAATCTGACTGTTTAAATTTCTCTGC  | GACTGTT | 22 | 12  | APP      | 0.88  | 0.00037 | 82.49  | 151.67 | -0.75 |
| cl_35265_chr21 | hsa-miR-106b-3p   | -1.41 | 0.000000 | 1010.79 | 381.55   | GAAACACTCGCGCACACCCTCAGTGCGCCCGGGCGGGGG   | CAGTGC  | 22 | 313 | BACE2    | 1.88  | 0.00000 | 11.14  | 40.86  | -2.64 |
| cl_35311_chr21 | hsa-miR-148b-5p   | 1.23  | 0.012750 | 26.06   | 60.93    | GACACTCCTCAGAAGTGTCTTACACATGCAGGTCGGTG    | CAGAACT | 10 | 51  | CBS      | -2.61 | 0.00000 | 39.36  | 6.46   | -3.20 |
| cl_35663_chr22 | hsa-miR-296-5p    | -1.00 | 0.001384 | 13.99   | 7.04     | GGACAGGCCCTCTCGGATGTTGGCAGGGGGCCCTTCTCTG  | GGGGCC  | 27 | 5   | KIAA1671 | 1.27  | 0.00000 | 6.46   | 15.56  | -1.26 |
| cl_35668_chr22 | hsa-miR-3917      | -1.74 | 0.000012 | 6.53    | 1.93     | ACTCCCTCCGGCGCAGCCGATTTAGTGAGTCCGAGAGCAGA | GTCGAG  | 29 | 21  | KIAA1671 | 1.27  | 0.00000 | 6.46   | 15.56  | -2.20 |
| cl_35917_chr22 | hsa-miR-154-5p    | -1.78 | 0.000287 | 2.46    | 0.71     | TGGTGGGTAACGGAGGAGCTGAATCAATAACCTTCATT    | ATAACCT | 29 | 10  | CYTH4    | 1.29  | 0.00000 | 27.44  | 66.95  | -2.29 |
| cl_36460_chrX  | hsa-miR-92b-5p    | 0.98  | 0.008992 | 0.54    | 1.12     | ACCTCGGTACAGCCGTCCTTTATCCACGGTTTTGCTTTC   | CCGTCCC | 13 | 25  | PDHA1    | -0.71 | 0.00000 | 95.03  | 58.14  | -0.69 |
| cl_37162_chrX  | hsa-miR-4523      | -1.05 | 0.028608 | 2.00    | 0.93     | TTCTCTGGGTGCCACAGCTTACTGCCGCTTCCAGTAGG    | TCTCGGT | 4  | 81  | AMOT     | 1.81  | 0.00001 | 1.20   | 4.22   | -1.91 |
| cl_37500_chrX  | hsa-miR-432-5p    | -1.20 | 0.006297 | 9.90    | 4.31     | GCCAAATCTCAAGCCTCTTCGGGGGAAGACAGTCCAGG    | CTCCAAG | 8  | 22  | PDZD4    | 0.92  | 0.01544 | 1.58   | 3.00   | -1.10 |
| cl_37633_chrY  | hsa-miR-628-5p    | 1.10  | 0.000433 | 4.00    | 8.61     | CCTATGTTCACTCAAGCCCTAGAGTTCTACAGTCAGCAGA  | GTCAGCA | 33 | 36  | TMSB4Y   | -1.02 | 0.03634 | 1.59   | 0.78   | -1.12 |
| cl_37635_chrY  | hsa-miR-181a-2-3p | -1.19 | 0.000679 | 227.17  | 99.88    | AGTAGAGATGTGGAGGAATCTTGAGTATGACTCAGTGAAC  | TCAGTGG | 32 | 15  | NLGN4Y   | 0.87  | 0.03142 | 3.39   | 6.19   | -1.03 |

|              |                   |       |          |          |          |                                            |         |    |    |          |       |         |        |        |       |
|--------------|-------------------|-------|----------|----------|----------|--------------------------------------------|---------|----|----|----------|-------|---------|--------|--------|-------|
| cl_3781_chr2 | hsa-miR-4755-3p   | -1.99 | 0.000050 | 2.99     | 0.74     | GGCCTGGCGGGCGTGC                           | GCCTGGC | 2  | 6  | ZNF513   | 0.95  | 0.00000 | 9.49   | 18.27  | -1.88 |
| cl_4372_chr2 | hsa-miR-449a      | -1.36 | 0.000063 | 5.99     | 2.35     | GCGGCTGACTTTGTACACACTGCCCTGGGTCTGGAGATACC  | CACTGCC | 18 | 11 | TACR1    | 0.81  | 0.00261 | 2.29   | 4.01   | -1.10 |
| cl_4477_chr2 | hsa-miR-103a-2-5p | -1.50 | 0.000002 | 5.75     | 2.00     | ACAGAAAATGAAAGAAGCATTAAAGCCATGGGAGAGTAGAAA | AAGAAGC | 12 | 22 | CD8B     | 1.39  | 0.00089 | 6.03   | 15.82  | -2.09 |
| cl_4680_chr2 | hsa-miR-3940-3p   | -0.81 | 0.023652 | 4.97     | 2.86     | TCTCACTGTGTTGCTTAGGCTGGTGTGAAATTC          | CCGGGCT | 34 | 22 | SH3RF3   | 1.56  | 0.00012 | 3.44   | 10.15  | -1.26 |
| cl_475_chr1  | hsa-miR-1304-3p   | -1.38 | 0.000040 | 25.27    | 9.67     | AGCACTGGCCTGGCTCACCTTCAGTGAGCACAGAGAAGCA   | CAGTGAG | 23 | 20 | VPS13D   | 0.67  | 0.00063 | 47.50  | 75.72  | -0.93 |
| cl_475_chr1  | hsa-miR-4420      | -2.03 | 0.000161 | 9.58     | 2.34     | AGCACTGGCCTGGCTCACCTTCAGTGAGCACAGAGAAGCA   | TCAGTGA | 22 | 20 | VPS13D   | 0.67  | 0.00063 | 47.50  | 75.72  | -1.36 |
| cl_5187_chr2 | hsa-miR-3667-3p   | -1.36 | 0.008075 | 1.56     | 0.64     | AAAGTCAAAAGAGGAAGGAATACCAGTGCCAAAATCATT    | AGGAAGG | 12 | 26 | GALNT1   | 0.44  | 0.00945 | 59.79  | 81.18  | -0.60 |
| cl_5338_chr2 | hsa-miR-30a-3p    | 0.99  | 0.025009 | 59.24    | 117.52   | TTACTACTACACTGAAAATTTTGATTATATTCTAGTATTTT  | ACTGAAA | 11 | 10 | PPIG     | -0.26 | 0.03304 | 90.94  | 75.69  | -0.26 |
| cl_5425_chr2 | hsa-miR-3648      | -1.65 | 0.002386 | 7.08     | 2.27     | TGGAACCCGGGACTGCTTTGGGAGGAGGCTCAATACGTC    | CCGGGCT | 7  | 11 | WIPF1    | 0.64  | 0.00019 | 210.18 | 328.48 | -1.06 |
| cl_5484_chr2 | hsa-miR-21-5p     | 0.77  | 0.013126 | 41871.47 | 71633.34 | GGGTAGGTTATATAATAAGCTGATATTTTGATGAGTTACTA  | ATAAGCT | 15 | 10 | DFNB59   | -0.84 | 0.00000 | 28.40  | 15.91  | -0.65 |
| cl_5545_chr2 | hsa-miR-151a-5p   | 1.39  | 0.000409 | 359.84   | 940.64   | AGCCGCTCCTCGTACCCACTATGCTCTGCGACATCGACCT   | CTCCTCG | 6  | 19 | ZC3H15   | -0.44 | 0.00163 | 135.44 | 99.88  | -0.61 |
| cl_5545_chr2 | hsa-miR-151b      | 3.24  | 0.000000 | 15.47    | 146.00   | AGCCGCTCCTCGTACCCACTATGCTCTGCGACATCGACCT   | CTCCTCG | 6  | 19 | ZC3H15   | -0.44 | 0.00163 | 135.44 | 99.88  | -1.42 |
| cl_5606_chr2 | hsa-miR-4518      | -1.83 | 0.000964 | 8.95     | 2.49     | GGATCCCTGAGTGGGATTCTGTGTGAAAGGCATTTTCACC   | CCCTGAG | 5  | 10 | SLC39A10 | 0.62  | 0.00277 | 30.06  | 46.25  | -1.14 |
| cl_5905_chr2 | hsa-miR-3940-3p   | -0.81 | 0.023652 | 4.97     | 2.86     | TCATGCCAGTTGTGAAGTTGACCCGGGCTCTGTTTGAG     | CCGGGCT | 25 | 28 | EPHA4    | 1.61  | 0.00144 | 4.16   | 12.72  | -1.31 |
| cl_5955_chr2 | hsa-miR-361-3p    | 1.24  | 0.003876 | 615.76   | 1454.95  | AATGAGTAGTAGGAGAGGACTGGCTTGCTGGGGTCTCTC    | CTGGGGG | 30 | 6  | IRS1     | -0.70 | 0.00273 | 25.28  | 15.51  | -0.87 |
| cl_6263_chr3 | hsa-miR-3200-3p   | 1.32  | 0.046718 | 6.16     | 15.43    | ATGCAAGGTCTACAGTCAGATGAGCATCTAACACAATTTGG  | GCAAGGT | 3  | 11 | SETMAR   | -1.03 | 0.00000 | 14.48  | 7.08   | -1.37 |
| cl_6387_chr3 | hsa-miR-221-5p    | 1.18  | 0.015984 | 188.23   | 426.85   | TTGAGCCATCTAACACGTGTGCCAGGCCTGGTCTGCACC    | TGCCAGG | 21 | 28 | NUP210   | -0.42 | 0.00506 | 379.21 | 283.01 | -0.50 |
| cl_6447_chr3 | hsa-let-7a-5p     | 1.81  | 0.000004 | 5051.85  | 17753.96 | TTCAGTACTCTCTAACTCTTCTCCCTGTTTTTCAGCTG     | CTACCTC | 6  | 7  | PLCL2    | -0.72 | 0.00007 | 60.11  | 36.52  | -1.30 |
| cl_6447_chr3 | hsa-let-7b-5p     | 1.71  | 0.000000 | 786.57   | 2572.37  | TTCAGTACTCTCTAACTCTTCTCCCTGTTTTTCAGCTG     | CTACCTC | 6  | 7  | PLCL2    | -0.72 | 0.00007 | 60.11  | 36.52  | -1.23 |
| cl_6447_chr3 | hsa-let-7d-5p     | 0.97  | 0.003359 | 541.68   | 1061.17  | TTCAGTACTCTCTAACTCTTCTCCCTGTTTTTCAGCTG     | CTACCTC | 6  | 7  | PLCL2    | -0.72 | 0.00007 | 60.11  | 36.52  | -0.70 |
| cl_6447_chr3 | hsa-let-7e-5p     | 1.57  | 0.000051 | 350.23   | 1042.74  | TTCAGTACTCTCTAACTCTTCTCCCTGTTTTTCAGCTG     | CTACCTC | 6  | 7  | PLCL2    | -0.72 | 0.00007 | 60.11  | 36.52  | -1.13 |
| cl_6447_chr3 | hsa-let-7f-5p     | 1.13  | 0.000287 | 8944.06  | 19581.46 | TTCAGTACTCTCTAACTCTTCTCCCTGTTTTTCAGCTG     | CTACCTC | 6  | 7  | PLCL2    | -0.72 | 0.00007 | 60.11  | 36.52  | -0.81 |
| cl_6447_chr3 | hsa-let-7g-5p     | 1.85  | 0.000001 | 5123.47  | 18520.87 | TTCAGTACTCTCTAACTCTTCTCCCTGTTTTTCAGCTG     | CTACCTC | 6  | 7  | PLCL2    | -0.72 | 0.00007 | 60.11  | 36.52  | -1.33 |
| cl_6447_chr3 | hsa-let-7i-5p     | 1.16  | 0.000505 | 4537.30  | 10130.51 | TTCAGTACTCTCTAACTCTTCTCCCTGTTTTTCAGCTG     | CTACCTC | 6  | 7  | PLCL2    | -0.72 | 0.00007 | 60.11  | 36.52  | -0.83 |
| cl_691_chr1  | hsa-miR-335-5p    | -1.09 | 0.000328 | 118.94   | 55.71    | CTTTCCGCTCGGAACTGTGACGTGGGAGAGCTCTTGA      | GCTCTTG | 34 | 12 | ZBTB40   | 0.51  | 0.01022 | 37.87  | 53.87  | -0.56 |
| cl_6939_chr3 | hsa-miR-106a-5p   | -1.48 | 0.000168 | 35.65    | 12.76    | TTTGTTAAGGTTGGAGGTTGCTGTAGCACTTTGGTACCA    | GCACCTT | 28 | 12 | CACNA1D  | 3.16  | 0.00000 | 1.64   | 14.70  | -4.68 |
| cl_6939_chr3 | hsa-miR-106b-5p   | -1.55 | 0.000000 | 617.66   | 211.04   | TTTGTTAAGGTTGGAGGTTGCTGTAGCACTTTGGTACCA    | GCACCTT | 28 | 12 | CACNA1D  | 3.16  | 0.00000 | 1.64   | 14.70  | -4.90 |
| cl_7355_chr3 | hsa-miR-378a-3p   | -1.54 | 0.000000 | 2405.55  | 827.87   | GACCCTGAAAGTCCAGGAATTGGGTTAAAATTCCTAAACCT  | AGTCCAG | 10 | 20 | CBLB     | 0.68  | 0.00710 | 44.53  | 71.48  | -1.05 |
| cl_7355_chr3 | hsa-miR-378c      | -1.27 | 0.000000 | 300.43   | 124.57   | GACCCTGAAAGTCCAGGAATTGGGTTAAAATTCCTAAACCT  | AGTCCAG | 10 | 20 | CBLB     | 0.68  | 0.00710 | 44.53  | 71.48  | -0.87 |
| cl_7355_chr3 | hsa-miR-378d      | -1.10 | 0.003182 | 14.73    | 6.83     | GACCCTGAAAGTCCAGGAATTGGGTTAAAATTCCTAAACCT  | AGTCCAG | 10 | 20 | CBLB     | 0.68  | 0.00710 | 44.53  | 71.48  | -0.75 |
| cl_7355_chr3 | hsa-miR-378i      | -2.12 | 0.000031 | 7.69     | 1.78     | GACCCTGAAAGTCCAGGAATTGGGTTAAAATTCCTAAACCT  | AGTCCAG | 10 | 20 | CBLB     | 0.68  | 0.00710 | 44.53  | 71.48  | -1.45 |
| cl_7419_chr3 | hsa-miR-4521      | -2.95 | 0.000000 | 35.56    | 4.58     | GCATAAATTTCTGTTGCTTAGGCGATCTCATAGTACTA     | TCCTTAG | 17 | 7  | ATP6V1A  | 0.49  | 0.01833 | 49.42  | 69.31  | -1.44 |
| cl_7491_chr3 | hsa-miR-4797-3p   | -2.18 | 0.000008 | 4.00     | 0.85     | CTTGGTGGGTTTACTCACTTCTACTGAGCATTGTACAAG    | TACTGAG | 24 | 12 | CD86     | 1.36  | 0.00000 | 32.55  | 83.35  | -2.96 |
| cl_7491_chr3 | hsa-miR-3609      | -2.85 | 0.000000 | 596.50   | 83.01    | CTTGGTGGGTTTACTCACTTCTACTGAGCATTGTACAAG    | TCACTTT | 16 | 12 | CD86     | 1.36  | 0.00000 | 32.55  | 83.35  | -3.86 |
| cl_7700_chr3 | hsa-miR-199a-5p   | 1.59  | 0.000007 | 181.97   | 548.37   | AATGTTAAAGACTCTTTTCTGCTCCAGCACACTGGCTAAA   | ACACTGG | 30 | 6  | TOPBP1   | -0.83 | 0.00000 | 202.23 | 113.47 | -1.33 |

|              |                  |       |          |         |          |                                           |          |    |     |          |       |         |       |       |       |
|--------------|------------------|-------|----------|---------|----------|-------------------------------------------|----------|----|-----|----------|-------|---------|-------|-------|-------|
| cl_788_chr1  | hsa-miR-3942-5p  | -0.98 | 0.015065 | 2.95    | 1.47     | CTTTGTCCTGAATGTGCTATTGCTACATGACTGGACTAGGC | TATTGCT  | 18 | 11  | PIGV     | 0.47  | 0.00257 | 7.90  | 10.94 | -0.46 |
| cl_7937_chr3 | hsa-miR-130a-3p  | 0.76  | 0.008363 | 223.96  | 380.59   | TAGGTTTTCCGTGTTGCACTATGTACCCGTATACCAATTC  | TTGCACT  | 15 | 7   | KCNAB1   | -0.45 | 0.00020 | 41.67 | 30.49 | -0.34 |
| cl_7949_chr3 | hsa-miR-589-3p   | -1.73 | 0.000002 | 17.95   | 5.34     | ACATTTAAACTTTGTCTGTTGGCAGCAGGGAACCATGACC  | TGTTCTG  | 13 | 10  | SHOX2    | 2.60  | 0.00000 | 0.61  | 3.67  | -4.49 |
| cl_797_chr1  | hsa-miR-10b-3p   | 3.02  | 0.000000 | 1.45    | 11.98    | CTAGGTACATGGCAGAATCTGGGCTAGAAGCCAAACTCC   | GAATCTG  | 16 | 102 | NUDC     | -0.97 | 0.00000 | 48.28 | 24.63 | -2.93 |
| cl_8018_chr3 | hsa-miR-155-5p   | 3.25  | 0.000000 | 1152.30 | 10989.11 | CAGCATTAGTTCATCTTGACTGATGCCCTTGACTCAGAGT  | AGCATTA  | 2  | 11  | GOLIM4   | -0.58 | 0.00180 | 39.99 | 26.79 | -1.88 |
| cl_8067_chr3 | hsa-miR-3136-5p  | 1.49  | 0.009911 | 0.81    | 2.26     | CTCTCTAATAATGCCTGTACTCTTAAGCTTCAGTCATACC  | TCAGTCA  | 31 | 26  | ECT2     | -1.10 | 0.00002 | 71.79 | 33.43 | -1.64 |
| cl_8370_chr3 | hsa-miR-148b-5p  | 1.23  | 0.012750 | 26.06   | 60.93    | AAAGAGTAAGCACTCACCTTTGGGGCAGAGCAGAACTGGC  | CAGAACT  | 32 | 27  | DLG1     | -0.38 | 0.00692 | 94.72 | 72.84 | -0.46 |
| cl_8670_chr4 | hsa-miR-145-5p   | -1.46 | 0.002408 | 414.75  | 150.53   | TTCTCCAGCCATAACAGAACTGGATAAAAGCTACTCTAGGT | AACTGGA  | 18 | 11  | HS3ST1   | 1.95  | 0.00000 | 1.48  | 5.73  | -2.85 |
| cl_8886_chr4 | hsa-miR-485-5p   | -1.88 | 0.001384 | 12.78   | 3.45     | AAGCAGCTCCTTGTCTGTTGTTGAGTCTCCCTAGCCT     | CAGCCTC  | 4  | 12  | FAM114A1 | 0.75  | 0.00566 | 8.53  | 14.38 | -1.41 |
| cl_9210_chr4 | hsa-miR-4662a-5p | 1.64  | 0.000301 | 0.82    | 2.46     | TCACTTTTCTCTTCCATGAGTCGAGTGTGTTGGCTAA     | TTGGCTA  | 34 | 17  | C4orf22  | -0.81 | 0.00073 | 4.35  | 2.48  | -1.33 |
| cl_9271_chr4 | hsa-miR-421      | 1.18  | 0.004426 | 77.75   | 176.19   | CTCCTTTGACTGTTGACAAATGCCACCTCTTTATATGC    | CTGTTGA  | 11 | 13  | KLHL8    | -0.84 | 0.00000 | 83.48 | 46.64 | -0.99 |
| cl_9498_chr4 | hsa-miR-181b-3p  | -0.88 | 0.018103 | 19.40   | 10.56    | TCAGTGAACATATATTTAGTTGCTAGAGGTTGTCTGGTGA  | TCAGTGA  | 1  | 13  | TRAM1L1  | 0.63  | 0.00031 | 3.61  | 5.60  | -0.56 |
| cl_9498_chr4 | hsa-miR-4420     | -2.03 | 0.000161 | 9.58    | 2.34     | TCAGTGAACATATATTTAGTTGCTAGAGGTTGTCTGGTGA  | TCAGTGA  | 1  | 13  | TRAM1L1  | 0.63  | 0.00031 | 3.61  | 5.60  | -1.28 |
| cl_9500_chr4 | hsa-miR-409-5p   | -1.67 | 0.004657 | 47.31   | 14.84    | GAGTGTAAGGGTGTGTAGGTGTTCTGGTAACCAGAGCCA   | GGTAACC  | 28 | 22  | TRAM1L1  | 0.63  | 0.00031 | 3.61  | 5.60  | -1.06 |
| cl_9693_chr4 | hsa-miR-93-3p    | -2.56 | 0.000000 | 153.44  | 25.99    | AAACTAAATTCAGCAGCGTGTGAAAACTTACTACCACA    | TCAGCAG  | 10 | 10  | IL15     | 1.42  | 0.00000 | 2.55  | 6.85  | -3.65 |
| cl_9696_chr4 | hsa-miR-204-5p   | -1.38 | 0.014138 | 67.02   | 25.73    | CAGGCCAGAACACATGCCTCTGCTGTGAAAGGGAGGAAAA  | AAAGGGA  | 29 | 21  | INPP4B   | 2.00  | 0.00000 | 7.16  | 28.60 | -2.76 |
| cl_9800_chr4 | hsa-miR-654-5p   | -1.68 | 0.000699 | 4.43    | 1.38     | TCCCCCATGCCACCCACCTGACCCCTCTTGCCAGTCCA    | GCCCCACC | 10 | 67  | TRIM2    | 0.84  | 0.00027 | 6.23  | 11.13 | -1.40 |
| cl_9833_chr4 | hsa-miR-130b-3p  | -2.24 | 0.000000 | 701.16  | 148.59   | TTCAATGTTCTACAGTATGGTGATCATTTTGCACTCAGTGT | TTGCACT  | 29 | 6   | CTSO     | 1.88  | 0.00000 | 7.57  | 27.91 | -4.21 |
| cl_9833_chr4 | hsa-miR-301a-3p  | -0.65 | 0.023052 | 241.53  | 153.73   | TTCAATGTTCTACAGTATGGTGATCATTTTGCACTCAGTGT | TTGCACT  | 29 | 6   | CTSO     | 1.88  | 0.00000 | 7.57  | 27.91 | -1.23 |
| cl_9833_chr4 | hsa-miR-19a-3p   | -2.41 | 0.000000 | 1852.64 | 349.18   | TTCAATGTTCTACAGTATGGTGATCATTTTGCACTCAGTGT | TTTGAC   | 28 | 6   | CTSO     | 1.88  | 0.00000 | 7.57  | 27.91 | -4.53 |
| cl_9833_chr4 | hsa-miR-19b-3p   | -1.82 | 0.000000 | 1655.38 | 468.75   | TTCAATGTTCTACAGTATGGTGATCATTTTGCACTCAGTGT | TTTGAC   | 28 | 6   | CTSO     | 1.88  | 0.00000 | 7.57  | 27.91 | -3.43 |

### Data from Raji/Namalwa

| CCR           | miRNA           | miR NA logFC | miRNA DE FDR | miRNA cpm BL | miRNA cpm nonBL | CCR Sequence                              | Seed Hit | Position in CCR | Read Count in Cluster | GeneID  | Genes logFC | Genes DEG FDR | CPM control | CPM sample | FC Correlation |
|---------------|-----------------|--------------|--------------|--------------|-----------------|-------------------------------------------|----------|-----------------|-----------------------|---------|-------------|---------------|-------------|------------|----------------|
| cl_10406_chr5 | hsa-miR-17-3p   | -2.96        | 0.000000     | 2176.96      | 279.17          | ATTTAAATGACATCACTGCTTCTGGGAAGTGCAGTGGATGG | CTGCAGT  | 29              | 41                    | FLT4    | 1.78        | 0.00000       | 4.94        | 17.02      | -5.28          |
| cl_10536_chr6 | hsa-miR-577     | -1.72        | 0.000050     | 660.86       | 200.99          | GTCAGGTTATCTATCCATGGTCACTTGGGTGGCAATCAGCA | TTATCTA  | 7               | 13                    | DSP     | 1.88        | 0.00006       | 2.68        | 9.88       | -3.23          |
| cl_10546_chr6 | hsa-miR-543     | -2.84        | 0.000000     | 7.68         | 1.04            | CCAGCCTCGTGTCTGACCTTTGGGCAATGTTACTTTGGC   | AATGTTT  | 27              | 35                    | SLC35B3 | 0.36        | 0.00855       | 26.59       | 34.13      | -1.02          |
| cl_10612_chr6 | hsa-miR-4517    | -1.60        | 0.000287     | 5.06         | 1.68            | GGAGTCTGTACGGCCAGCTGGGGCATTATTTCCCA       | CATATTT  | 31              | 10                    | CD83    | 2.00        | 0.00000       | 56.81       | 226.92     | -3.20          |
| cl_10649_chr6 | hsa-miR-199a-3p | 0.65         | 0.033491     | 809.01       | 1268.66         | AGCAGCTTCGGAGAGACGGCTGTTTCAGGCTACTGTGCCTT | CTACTGT  | 30              | 21                    | KDM1B   | -0.38       | 0.04632       | 53.23       | 40.98      | -0.24          |

|               |                  |       |          |          |           |                                            |         |    |         |         |       |         |        |        |       |
|---------------|------------------|-------|----------|----------|-----------|--------------------------------------------|---------|----|---------|---------|-------|---------|--------|--------|-------|
| cl_10649_chr6 | hsa-miR-199b-3p  | 0.65  | 0.033410 | 807.77   | 1267.49   | AGCAGCTTCGGAGAGACGGCTGTTTCAGGCTACTGTGCCTT  | CTACTGT | 30 | 21      | KDM1B   | -0.38 | 0.04632 | 53.23  | 40.98  | -0.25 |
| cl_10662_chr6 | hsa-miR-141-5p   | 2.49  | 0.037052 | 0.93     | 5.06      | AATTAGCGCTGTGGCACCCTGTGGAAGATGAGTTGGAGGA   | GAAGATG | 25 | 27      | E2F3    | -0.71 | 0.00000 | 35.58  | 21.68  | -1.78 |
| cl_10848_chr6 | hsa-miR-573      | -2.99 | 0.000000 | 3.34     | 0.42      | TGGGTGAAGTGACTTCAGTAATAACAATAATGTCAAATATC  | ACTTCAG | 12 | 40      | NOTCH4  | 0.66  | 0.00658 | 7.87   | 12.42  | -1.97 |
| cl_10913_chr6 | hsa-miR-625-5p   | -1.31 | 0.000026 | 20.75    | 8.38      | GGCCCCGGCGGGGCGCCCCCTCCCCTCCCCTCCTGCGAGC   | TCCCCCT | 26 | 12      | SCUBE3  | 0.72  | 0.00203 | 1.97   | 3.26   | -0.95 |
| cl_10996_chr6 | hsa-miR-193b-5p  | -1.17 | 0.019368 | 21.00    | 9.29      | CTGGCCTCGGACTAATCCTATGGGGCGCTTGCAAAACCCCGG | AACCCCG | 34 | 14      | FOXP4   | 0.54  | 0.00390 | 25.77  | 37.50  | -0.63 |
| cl_1120_chr1  | hsa-miR-3622a-5p | 3.06  | 0.000010 | 0.23     | 1.89      | GTCCAGGACAGGTGCCTGCCTGTCTGCGGGACCCCTATTG   | GTGCCTG | 12 | 8       | DOCK7   | -0.54 | 0.00180 | 28.73  | 19.78  | -1.65 |
| cl_11317_chr6 | hsa-miR-449a     | -1.36 | 0.000063 | 5.99     | 2.35      | AATCTAATCTACAGTCCGATGATGTTACTGCCATCTCCTC   | ACTGCCA | 28 | 1107853 | RWDD2A  | 0.81  | 0.00000 | 2.64   | 4.61   | -1.10 |
| cl_11448_chr6 | hsa-miR-342-5p   | 0.77  | 0.020518 | 31.43    | 53.35     | CTCTCTCCACCCCTCCCCTCACAGATCCTTCCCTCCCG     | CACCCCT | 9  | 26      | CCNC    | -0.37 | 0.02256 | 87.35  | 67.57  | -0.28 |
| cl_11448_chr6 | hsa-miR-4677-3p  | 2.36  | 0.000008 | 6.84     | 35.21     | CTCTCTCCACCCCTCCCCTCACAGATCCTTCCCTCCCG     | TCACAGA | 21 | 26      | CCNC    | -0.37 | 0.02256 | 87.35  | 67.57  | -0.87 |
| cl_114_chr1   | hsa-miR-138-5p   | 1.70  | 0.013928 | 24.26    | 78.83     | CCTGGAGGACCAGTCCCCTGGGGGAGTACGGCCTCAAGC    | ACCAGCT | 9  | 22      | ISG15   | -1.15 | 0.00040 | 29.93  | 13.50  | -1.95 |
| cl_114_chr1   | hsa-miR-361-3p   | 1.24  | 0.003876 | 615.76   | 1454.95   | CCTGGAGGACCAGTCCCCTGGGGGAGTACGGCCTCAAGC    | TGGGGGA | 21 | 22      | ISG15   | -1.15 | 0.00040 | 29.93  | 13.50  | -1.42 |
| cl_11522_chr6 | hsa-miR-369-3p   | -1.14 | 0.016758 | 3.61     | 1.65      | TTATTATTTAATATAGATCTGTAACCTCGGTTCCAAGTAC   | TATTATT | 2  | 34      | FIG4    | 0.66  | 0.00006 | 22.55  | 35.61  | -0.75 |
| cl_11645_chr6 | hsa-miR-365a-5p  | -0.99 | 0.047890 | 4.19     | 2.08      | TTATGGCATTGATGCAAAAGTGAAGATATAAAGTCCCTTGT  | AGTCCCT | 32 | 20      | RSPO3   | 1.14  | 0.00024 | 2.47   | 5.44   | -1.13 |
| cl_11799_chr6 | hsa-miR-3613-3p  | -0.59 | 0.049047 | 4.41     | 2.92      | TTTTCTTTTTGTACAGTCTGCACCATCTTTCCTTTTGT     | TTTTTGT | 8  | 19      | STX11   | 1.23  | 0.00011 | 5.29   | 12.38  | -0.73 |
| cl_11805_chr6 | hsa-miR-18a-3p   | -2.46 | 0.000000 | 88.89    | 16.14     | GGGGAGTTTGACTGGGGCAGTACACCTGTCAAACAGTAATG  | GGGCAGT | 15 | 5       | UTRN    | 1.37  | 0.00000 | 47.31  | 121.93 | -3.36 |
| cl_11836_chr6 | hsa-miR-577      | -1.72 | 0.000050 | 660.86   | 200.99    | ATTATACCCTATCTCAGTCTGGAACACTTATCTAAGACCA   | TTATCTA | 29 | 49      | STXBP5  | 0.44  | 0.00895 | 17.73  | 24.09  | -0.76 |
| cl_12122_chr7 | hsa-miR-4420     | -2.03 | 0.000161 | 9.58     | 2.34      | GCTGTGGAGGGGTTGGAAGTGGCTGGGAGAGTCAAGTACG   | CAGTGAC | 34 | 25      | PDGFA   | 1.26  | 0.00026 | 2.97   | 7.09   | -2.55 |
| cl_12131_chr7 | hsa-miR-188-5p   | 0.79  | 0.036509 | 3.15     | 5.40      | TTCATATGTAGGTAAGGGATGCAAAATTTACAGGGAAATT   | AGGGATG | 16 | 5       | PRKAR1B | -0.74 | 0.00014 | 51.78  | 31.08  | -0.58 |
| cl_1297_chr1  | hsa-miR-101-5p   | 1.15  | 0.002105 | 4.96     | 11.04     | TACTGGCCAGGGTAGACTAATAACTGATGGCATTATATGC   | ATAACTG | 20 | 55      | HS2ST1  | -0.60 | 0.00045 | 127.84 | 84.23  | -0.69 |
| cl_1297_chr1  | hsa-miR-10b-5p   | 1.65  | 0.000237 | 64964.70 | 203496.95 | TACTGGCCAGGGTAGACTAATAACTGATGGCATTATATGC   | CAGGGTA | 8  | 55      | HS2ST1  | -0.60 | 0.00045 | 127.84 | 84.23  | -0.99 |
| cl_1319_chr1  | hsa-miR-26a-5p   | 2.23  | 0.000003 | 6330.25  | 29697.53  | AATCCTGACTTGAATGCAGATGTTTGTGAAGCTTCTGGA    | ACTTGAA | 8  | 19      | ZNF326  | -0.57 | 0.00001 | 44.07  | 29.74  | -1.27 |
| cl_1319_chr1  | hsa-miR-26b-5p   | 0.84  | 0.010386 | 2601.75  | 4666.53   | AATCCTGACTTGAATGCAGATGTTTGTGAAGCTTCTGGA    | ACTTGAA | 8  | 19      | ZNF326  | -0.57 | 0.00001 | 44.07  | 29.74  | -0.48 |
| cl_1339_chr1  | hsa-miR-125a-5p  | 1.58  | 0.000340 | 2323.77  | 6956.82   | CCTAAGAAGTCTGCAAGATCTGGAAGTCAAGGAGAGTATC   | TCAGGGA | 28 | 22      | CDC7    | -1.42 | 0.00000 | 59.97  | 22.36  | -2.25 |
| cl_13535_chr7 | hsa-miR-92a-1-5p | -1.14 | 0.012809 | 38.34    | 17.48     | GTCTAAGACCAACCTTTGATCATCTGTGGCTCATGACTG    | CCAACCT | 10 | 8       | TPK1    | 0.65  | 0.00069 | 6.02   | 9.43   | -0.74 |
| cl_1360_chr1  | hsa-miR-944      | 3.11  | 0.000048 | 7.33     | 63.31     | TTTACTTGATTTTTATAATTTACAGTCTAAGATCGAGGC    | ATAATT  | 16 | 21      | DR1     | -0.43 | 0.00077 | 91.00  | 67.63  | -1.33 |
| cl_13640_chr7 | hsa-miR-149-5p   | -1.00 | 0.003123 | 13.82    | 6.89      | CAGCTGAGCCAGATGACTCTAAATCCATGAAAGATGATT    | AGCCAGA | 7  | 7       | PRKAG2  | 0.92  | 0.00002 | 9.78   | 18.45  | -0.91 |
| cl_13870_chr8 | hsa-miR-3648     | -1.65 | 0.002386 | 7.08     | 2.27      | AAGGAGGCGCCGCCCTCCCCTCCCGCGGCTGCGCCCGCAGC  | CGCGGCT | 25 | 11      | MFHAS1  | 1.16  | 0.00014 | 37.05  | 82.57  | -1.91 |
| cl_1396_chr1  | hsa-miR-3922-3p  | 1.24  | 0.017898 | 0.75     | 1.82      | CCTTCTTATGACCAAGTTGATTGGCCAGAAGTGGTAT      | GGCCAGA | 27 | 13      | PTBP2   | -1.28 | 0.00000 | 53.86  | 22.22  | -1.59 |
| cl_13972_chr8 | hsa-miR-379-3p   | -2.39 | 0.000004 | 3.13     | 0.58      | ATTTCTATTTGGTATTGAGTTGCTAGAGTTCTTACATAAT   | TTACATA | 33 | 18      | ASA1    | 0.42  | 0.04097 | 132.15 | 176.21 | -0.99 |
| cl_14183_chr8 | hsa-miR-485-5p   | -1.88 | 0.001384 | 12.78    | 3.45      | TTTCCCTTTGGTGGATTGGCTGAGAGGCGCCTCTGGGGCT   | AGCCTCT | 29 | 21      | KCNU1   | 1.70  | 0.00941 | 1.09   | 3.55   | -3.20 |
| cl_1462_chr1  | hsa-miR-15b-3p   | -0.95 | 0.002065 | 65.01    | 33.63     | AGCAATGTTGTCATGGTTCTCTATAGTGATTGATGAAAG    | TGATTG  | 28 | 23      | NTNG1   | 1.17  | 0.02029 | 2.38   | 5.34   | -1.11 |

|                |                   |       |          |          |          |                                           |         |    |       |          |       |         |        |       |       |
|----------------|-------------------|-------|----------|----------|----------|-------------------------------------------|---------|----|-------|----------|-------|---------|--------|-------|-------|
| cl_1465_chr1   | hsa-miR-296-5p    | -1.00 | 0.001384 | 13.99    | 7.04     | TATACACAGTGATTAAGGTTTTGGGGCCCTAATAAATTC   | GGGCCCT | 25 | 2847  | NTNG1    | 1.17  | 0.02029 | 2.38   | 5.34  | -1.16 |
| cl_1474_chr1   | hsa-miR-4687-5p   | -0.90 | 0.006179 | 2.46     | 1.27     | TGAGTCTTGAAGCCAGGGCTGGGCCGGGAGAGCCGCCG    | AGGGCTG | 16 | 19825 | VAV3     | 1.48  | 0.00000 | 12.77  | 35.63 | -1.33 |
| cl_14854_chr8  | hsa-miR-127-5p    | -1.65 | 0.000512 | 10.82    | 3.43     | GTGAAGGTGACTGGCTTCAGTGAAGGTGTGCAGGTGGTGT  | GCTTCAG | 14 | 6     | ZFPM2    | 0.94  | 0.00126 | 2.86   | 5.50  | -1.56 |
| cl_15072_chr8  | hsa-miR-181a-2-3p | -1.19 | 0.000679 | 227.17   | 99.88    | GCGGTATAAAGAAACCTCAGTGGTTGTATCAGTCAGCTTTC | CAGTGGT | 18 | 105   | ST3GAL1  | 1.01  | 0.00000 | 29.05  | 58.53 | -1.20 |
| cl_15609_chr9  | hsa-miR-3613-3p   | -0.59 | 0.049047 | 4.41     | 2.92     | GACTCGGGAGAAGGTCCACCTTTTGTCTATGCGGCCTT    | TTTTTGT | 21 | 13    | SHB      | 0.49  | 0.04647 | 3.43   | 4.81  | -0.29 |
| cl_1577_chr1   | hsa-miR-142-5p    | 1.61  | 0.000008 | 14066.72 | 42815.44 | ATGTCTTTATGGCTCTTCGAATTTAACTTAAGAAGGAGTT  | CTTTATG | 5  | 675   | BCAS2    | -0.52 | 0.00029 | 19.61  | 13.68 | -0.83 |
| cl_15932_chr9  | hsa-miR-708-5p    | 1.88  | 0.000003 | 14.78    | 54.47    | TGGGCAGTCCCAGAAAGCTATTGGCCAAGCGCTCTTCAGG  | GCTCCTT | 31 | 32    | GALNT12  | -0.54 | 0.02726 | 9.95   | 6.87  | -1.01 |
| cl_16342_chr9  | hsa-miR-1304-3p   | -1.38 | 0.000040 | 25.27    | 9.67     | GAGGCCCGGGGCCAGGGAGTGAGACCTTGCTTCTGACTT   | AGTGAGA | 19 | 16    | NTNG2    | 1.18  | 0.00012 | 3.25   | 7.38  | -1.64 |
| cl_16346_chr9  | hsa-miR-4677-3p   | 2.36  | 0.000008 | 6.84     | 35.21    | AGTTGGTGATCACAGATTTTTCTCAGGATATCTGCCGTG   | TCACAGA | 10 | 7     | TTF1     | -0.35 | 0.01097 | 22.60  | 17.68 | -0.84 |
| cl_16893_chr10 | hsa-miR-3667-5p   | -1.09 | 0.016230 | 1.50     | 0.71     | GTTGACCTTAAACCGACACTTCTTCTTTCGGGTCTTTCC   | GGTCTT  | 33 | 6     | ARHGAP12 | 0.65  | 0.00001 | 17.42  | 27.39 | -0.71 |
| cl_16894_chr10 | hsa-miR-103a-2-5p | -1.50 | 0.000002 | 5.75     | 2.00     | CACTGCTACTGGAGAAGCTTTGGGGAGTGGCAAACCTGGA  | AGAAGCT | 13 | 42    | ARHGAP12 | 0.65  | 0.00001 | 17.42  | 27.39 | -0.98 |
| cl_17530_chr10 | hsa-miR-30a-3p    | 0.99  | 0.025009 | 59.24    | 117.52   | TGGGTAACTGAAAGCATTAAAGCAAGAGAGTAACATGA    | CTGAAAG | 11 | 18    | GOT1     | -0.46 | 0.00157 | 30.97  | 22.49 | -0.46 |
| cl_17654_chr10 | hsa-let-7a-5p     | 1.81  | 0.000004 | 5051.85  | 17753.96 | TTTGAAGCTTTGTCAAATCTGGGATTGTACTCAGTTTGC   | TACCTCA | 29 | 12    | SMC3     | -0.73 | 0.00000 | 145.91 | 88.13 | -1.32 |
| cl_17654_chr10 | hsa-let-7b-5p     | 1.71  | 0.000000 | 786.57   | 2572.37  | TTTGAAGCTTTGTCAAATCTGGGATTGTACTCAGTTTGC   | TACCTCA | 29 | 12    | SMC3     | -0.73 | 0.00000 | 145.91 | 88.13 | -1.24 |
| cl_17654_chr10 | hsa-let-7e-5p     | 1.57  | 0.000051 | 350.23   | 1042.74  | TTTGAAGCTTTGTCAAATCTGGGATTGTACTCAGTTTGC   | TACCTCA | 29 | 12    | SMC3     | -0.73 | 0.00000 | 145.91 | 88.13 | -1.14 |
| cl_17654_chr10 | hsa-let-7f-5p     | 1.13  | 0.000287 | 8944.06  | 19581.46 | TTTGAAGCTTTGTCAAATCTGGGATTGTACTCAGTTTGC   | TACCTCA | 29 | 12    | SMC3     | -0.73 | 0.00000 | 145.91 | 88.13 | -0.82 |
| cl_17654_chr10 | hsa-let-7g-5p     | 1.85  | 0.000001 | 5123.47  | 18520.87 | TTTGAAGCTTTGTCAAATCTGGGATTGTACTCAGTTTGC   | TACCTCA | 29 | 12    | SMC3     | -0.73 | 0.00000 | 145.91 | 88.13 | -1.35 |
| cl_17654_chr10 | hsa-let-7i-5p     | 1.16  | 0.000505 | 4537.30  | 10130.51 | TTTGAAGCTTTGTCAAATCTGGGATTGTACTCAGTTTGC   | TACCTCA | 29 | 12    | SMC3     | -0.73 | 0.00000 | 145.91 | 88.13 | -0.84 |
| cl_17749_chr10 | hsa-miR-4517      | -1.60 | 0.000287 | 5.06     | 1.68     | CTCGAGCATATTTCCAGAACCTGTCTAGTCTCAATTTCTTG | CATATTT | 7  | 9     | GRK5     | 0.61  | 0.00422 | 25.16  | 38.48 | -0.98 |
| cl_17752_chr10 | hsa-miR-1254      | -1.46 | 0.000090 | 5.06     | 1.83     | AAAGAGGATTTCCAGGCTCCTGAAGCGAACGCGGTGACCAA | CCAGGCT | 12 | 7     | RGS10    | 0.54  | 0.01050 | 51.33  | 74.85 | -0.79 |
| cl_17782_chr10 | hsa-miR-151a-5p   | 1.39  | 0.000409 | 359.84   | 940.64   | ACCTTTCAGTCTCGAATCCTCTCATCTCCACCACAGCTGC  | TCCTCGA | 10 | 12    | TACC2    | -0.79 | 0.02326 | 5.95   | 3.44  | -1.10 |
| cl_17782_chr10 | hsa-miR-151b      | 3.24  | 0.000000 | 15.47    | 146.00   | ACCTTTCAGTCTCGAATCCTCTCATCTCCACCACAGCTGC  | TCCTCGA | 10 | 12    | TACC2    | -0.79 | 0.02326 | 5.95   | 3.44  | -2.56 |
| cl_1780_chr1   | hsa-miR-582-5p    | 1.76  | 0.002936 | 4.61     | 15.62    | TAAGCCATATTAAGCTTCATGTACTGTAAAGTCAGGGATG  | ACTGTAA | 24 | 11    | KCNN3    | -1.63 | 0.00002 | 30.27  | 9.76  | -2.87 |
| cl_1780_chr1   | hsa-miR-135b-5p   | 1.51  | 0.007710 | 1.71     | 4.91     | TAAGCCATATTAAGCTTCATGTACTGTAAAGTCAGGGATG  | AGCCATA | 3  | 11    | KCNN3    | -1.63 | 0.00002 | 30.27  | 9.76  | -2.46 |
| cl_1780_chr1   | hsa-miR-125a-5p   | 1.58  | 0.000340 | 2323.77  | 6956.82  | TAAGCCATATTAAGCTTCATGTACTGTAAAGTCAGGGATG  | TCAGGGA | 33 | 11    | KCNN3    | -1.63 | 0.00002 | 30.27  | 9.76  | -2.58 |
| cl_18141_chr11 | hsa-miR-4420      | -2.03 | 0.000161 | 9.58     | 2.34     | CTATCCTCAGAGTTCGACAGTGACGACTGAAGCTGAAGCAA | CAGTGAC | 18 | 10    | FAM160A2 | 0.47  | 0.00159 | 22.39  | 31.01 | -0.95 |
| cl_1884_chr1   | hsa-miR-365a-5p   | -0.99 | 0.047890 | 4.19     | 2.08     | CTGGCCTCAGTCCCTAAAAATGATGTGGAAAGGAAAGCCCA | AGTCCCT | 9  | 23    | SLAMF8   | 1.21  | 0.00022 | 25.18  | 58.32 | -1.20 |
| cl_18870_chr11 | hsa-miR-590-5p    | -0.84 | 0.028628 | 6.20     | 3.43     | CCGCATAAGCTCCAAAGGCTTGTGGTATTACAGACCTGAGG | TAAGCTC | 6  | 20    | CCND1    | 1.30  | 0.00000 | 8.24   | 20.32 | -1.09 |
| cl_19111_chr11 | hsa-miR-369-3p    | -1.14 | 0.016758 | 3.61     | 1.65     | GCCACAATTGTTATTATTTTAGAGTTCTACATCCAAGATC  | TATTATT | 13 | 30    | RAB38    | 1.21  | 0.00000 | 0.83   | 1.91  | -1.37 |
| cl_19111_chr11 | hsa-miR-432-5p    | -1.20 | 0.006297 | 9.90     | 4.31     | GCCACAATTGTTATTATTTTAGAGTTCTACATCCAAGATC  | TCCAAGA | 33 | 30    | RAB38    | 1.21  | 0.00000 | 0.83   | 1.91  | -1.44 |
| cl_1917_chr1   | hsa-miR-204-5p    | -1.38 | 0.014138 | 67.02    | 25.73    | ATAATGTACGTAAGGGAAGTTTTATTAAAATGTCTCTAGA  | AAGGGAA | 12 | 14    | ATF6     | 0.35  | 0.01572 | 36.99  | 47.22 | -0.49 |



|                |                   |       |          |         |         |                                           |         |    |     |          |       |         |         |         |       |
|----------------|-------------------|-------|----------|---------|---------|-------------------------------------------|---------|----|-----|----------|-------|---------|---------|---------|-------|
| cl_19274_chr11 | hsa-miR-4687-5p   | -0.90 | 0.006179 | 2.46    | 1.27    | ATCCCGAGGGCTGAAAGGTGTGCCCTGAGAGGTGCCCAT   | AGGGCTG | 7  | 27  | NPAT     | 0.32  | 0.03492 | 39.17   | 48.90   | -0.29 |
| cl_19334_chr11 | hsa-miR-3648      | -1.65 | 0.002386 | 7.08    | 2.27    | GGGCGGGGGAGGTGCGGGTCTGGTGGCCGCCGACGG      | CGCGGCT | 15 | 53  | NCAM1    | 1.32  | 0.01354 | 2.60    | 6.52    | -2.18 |
| cl_19456_chr11 | hsa-miR-149-5p    | -1.00 | 0.003123 | 13.82   | 6.89    | TTGAGCCAGAATCTCACTCTTGTCACCCAGGCTGGAGTACA | AGCCAGA | 4  | 16  | THY1     | 0.80  | 0.01446 | 45.69   | 79.40   | -0.80 |
| cl_19456_chr11 | hsa-miR-1254      | -1.46 | 0.000090 | 5.06    | 1.83    | TTGAGCCAGAATCTCACTCTTGTCACCCAGGCTGGAGTACA | CCAGGCT | 27 | 16  | THY1     | 0.80  | 0.01446 | 45.69   | 79.40   | -1.16 |
| cl_20048_chr12 | hsa-miR-17-5p     | -1.37 | 0.000088 | 1233.06 | 477.71  | GTCTTCAAAAAGAATCACACTTTGTAGGGTAAGTCCGAAC  | CACCTTG | 18 | 46  | CNTN1    | 1.42  | 0.00009 | 1.68    | 4.48    | -1.94 |
| cl_20048_chr12 | hsa-miR-20b-5p    | -1.12 | 0.042021 | 59.74   | 27.49   | GTCTTCAAAAAGAATCACACTTTGTAGGGTAAGTCCGAAC  | CACCTTG | 18 | 46  | CNTN1    | 1.42  | 0.00009 | 1.68    | 4.48    | -1.58 |
| cl_20048_chr12 | hsa-miR-3609      | -2.85 | 0.000000 | 596.50  | 83.01   | GTCTTCAAAAAGAATCACACTTTGTAGGGTAAGTCCGAAC  | CACCTTG | 18 | 46  | CNTN1    | 1.42  | 0.00009 | 1.68    | 4.48    | -4.03 |
| cl_20048_chr12 | hsa-miR-93-5p     | -1.06 | 0.001859 | 2255.60 | 1081.01 | GTCTTCAAAAAGAATCACACTTTGTAGGGTAAGTCCGAAC  | CACCTTG | 18 | 46  | CNTN1    | 1.42  | 0.00009 | 1.68    | 4.48    | -1.50 |
| cl_20136_chr12 | hsa-miR-93-3p     | -2.56 | 0.000000 | 153.44  | 25.99   | GTTATGTTCCAGAGTCCGTGACAGCAGTCTCCACTCTGCA  | CAGCAGT | 23 | 27  | TMBIM6   | 0.77  | 0.00000 | 337.05  | 575.37  | -1.97 |
| cl_20298_chr12 | hsa-miR-4781-3p   | 1.58  | 0.000108 | 0.49    | 1.50    | AAAAAAAAGCAGTCTTCTGTTTCAACATTCCCTTTATCCT  | CAACATT | 24 | 11  | XRCC6BP1 | -1.40 | 0.00000 | 18.50   | 7.01    | -2.21 |
| cl_20396_chr12 | hsa-miR-708-3p    | 0.98  | 0.026809 | 18.72   | 36.79   | TGACCAATCGTACTGTCAATTGATGCCACTAGTTGTTAAT  | CTAGTTG | 30 | 107 | CCT2     | -1.17 | 0.00000 | 389.18  | 172.41  | -1.15 |
| cl_20396_chr12 | hsa-miR-3681-5p   | 5.07  | 0.000000 | 1.82    | 61.30   | TGACCAATCGTACTGTCAATTGATGCCACTAGTTGTTAAT  | TCCACTA | 26 | 107 | CCT2     | -1.17 | 0.00000 | 389.18  | 172.41  | -5.96 |
| cl_2061_chr1   | hsa-miR-4797-3p   | -2.18 | 0.000008 | 4.00    | 0.85    | TTCATTCAGTGAAGCTGATTGAGGGCCTCTGCAGAAAA    | ACTGAGA | 8  | 15  | SEC16B   | 1.61  | 0.00000 | 1.33    | 4.08    | -3.52 |
| cl_20837_chr12 | hsa-miR-204-5p    | -1.38 | 0.014138 | 67.02   | 25.73   | TATCATTGGTCAAACCACTGAAAGCCGGGGTAAGGGAAC   | AAGGGAA | 34 | 5   | TBX3     | 1.03  | 0.00123 | 1.62    | 3.31    | -1.42 |
| cl_21247_chr13 | hsa-miR-3200-3p   | 1.32  | 0.046718 | 6.16    | 15.43   | TACATGCTAGAATTGTACCTTCCAAGGTGAACAGAACAGC  | CAAGGTG | 24 | 6   | NUPL1    | -0.42 | 0.01829 | 82.94   | 62.03   | -0.55 |
| cl_2190_chr1   | hsa-miR-3940-3p   | -0.81 | 0.023652 | 4.97    | 2.86    | TGCCAAAGGAGATTAACATGTGAGTCAACGGGCTGGGAAAG | CGGGCTG | 29 | 6   | PLA2G4A  | 1.33  | 0.00000 | 2.24    | 5.63    | -1.08 |
| cl_22095_chr14 | hsa-miR-199a-5p   | 1.59  | 0.000007 | 181.97  | 548.37  | CACTGGGTTACAGTTTCGATTCCGCTGACTCTTCTGTCTCA | CACTGGG | 1  | 16  | CTSG     | -3.77 | 0.00000 | 23.11   | 1.70    | -5.99 |
| cl_22305_chr14 | hsa-miR-9-3p      | 2.32  | 0.000225 | 2.29    | 11.53   | GCTTTATTACTTATAGTTGTAATTTAAAGATGTTAG      | GCTTTAT | 1  | 8   | CDKN3    | -1.90 | 0.00000 | 69.03   | 18.44   | -4.42 |
| cl_22365_chr14 | hsa-miR-199a-3p   | 0.65  | 0.033491 | 809.01  | 1268.66 | TGCCTACTGTTAATTAATAATTTATTGTCAAAGTTTGAC   | CTACTGT | 4  | 556 | PPM1A    | -0.58 | 0.00001 | 70.25   | 46.92   | -0.38 |
| cl_22365_chr14 | hsa-miR-199b-3p   | 0.65  | 0.033410 | 807.77  | 1267.49 | TGCCTACTGTTAATTAATAATTTATTGTCAAAGTTTGAC   | CTACTGT | 4  | 556 | PPM1A    | -0.58 | 0.00001 | 70.25   | 46.92   | -0.38 |
| cl_22776_chr14 | hsa-miR-3136-5p   | 1.49  | 0.009911 | 0.81    | 2.26    | GTCGTGCTCGTCCCGGGCTGGAGTGCAGTCAGTGGTATG   | CAGTCAG | 28 | 5   | PAPOLA   | -0.34 | 0.00489 | 247.27  | 195.82  | -0.50 |
| cl_22776_chr14 | hsa-miR-766-3p    | 0.67  | 0.048792 | 39.23   | 62.52   | GTCGTGCTCGTCCCGGGCTGGAGTGCAGTCAGTGGTATG   | CTGGAGT | 20 | 5   | PAPOLA   | -0.34 | 0.00489 | 247.27  | 195.82  | -0.23 |
| cl_2314_chr1   | hsa-miR-103a-2-5p | -1.50 | 0.000002 | 5.75    | 2.00    | CAACAGCAGAAGCTTTGATCTCGGGATGAATTGGAGTCTGT | AGAAGCT | 8  | 10  | CHI3L1   | 2.27  | 0.00065 | 21.30   | 102.42  | -3.40 |
| cl_2314_chr1   | hsa-miR-5695      | -1.35 | 0.003064 | 1.44    | 0.54    | CAACAGCAGAAGCTTTGATCTCGGGATGAATTGGAGTCTGT | TTGGAGT | 31 | 10  | CHI3L1   | 2.27  | 0.00065 | 21.30   | 102.42  | -3.05 |
| cl_23151_chr15 | hsa-miR-125a-3p   | 1.45  | 0.000079 | 1.91    | 5.30    | CTCAGCAGAAGCAGCACCTGTGACTTACCTTCAGGAGCCAG | CACCTGT | 15 | 26  | PAK6     | -1.38 | 0.00000 | 33.22   | 12.78   | -2.00 |
| cl_23217_chr15 | hsa-miR-106b-5p   | -1.55 | 0.000000 | 617.66  | 211.04  | TATTGATATGCTTATACACTTACACTTTATGCACAAAATGT | CACCTTA | 23 | 27  | B2M      | 1.21  | 0.00000 | 2723.06 | 6284.85 | -1.87 |
| cl_2361_chr1   | hsa-miR-361-3p    | 1.24  | 0.003876 | 615.76  | 1454.95 | GCAGCTGGAACATGAAAATCTGGGGGAGGGGAAGAGAAAT  | TGGGGGA | 21 | 8   | CDK18    | -0.70 | 0.00226 | 13.33   | 8.22    | -0.86 |
| cl_24199_chr16 | hsa-miR-17-3p     | -2.96 | 0.000000 | 2176.96 | 279.17  | GAGTTCTGAGTCCGATCATTATTCAACATCCATGT       | CTGCAGT | 6  | 9   | SNN      | 0.45  | 0.04468 | 32.10   | 43.77   | -1.32 |
| cl_24340_chr16 | hsa-miR-577       | -1.72 | 0.000050 | 660.86  | 200.99  | TGCTTATCTAGAGAATTCCTAACCTCAACACGGCGTGGTA  | TTATCTA | 4  | 24  | PRKCB    | 0.66  | 0.01255 | 128.23  | 202.93  | -1.14 |
| cl_25137_chr16 | hsa-miR-150-3p    | 3.38  | 0.000000 | 3.49    | 36.47   | CAGCCGATTCAAGGCTGATGTACCAGCACCGCAGGGACCCT | GTACCAG | 20 | 506 | CPNE7    | -1.66 | 0.00041 | 11.98   | 3.79    | -5.62 |
| cl_25269_chr17 | hsa-miR-3940-3p   | -0.81 | 0.023652 | 4.97    | 2.86    | CTCTGAGGTGGGCTCTGGGGTGGTGGGCTGGGGCGGGCT   | CGGGCTG | 25 | 117 | GP1BA    | 2.62  | 0.00000 | 1.96    | 12.06   | -2.12 |

|                |                  |       |          |        |         |                                            |          |    |     |         |       |         |        |        |       |
|----------------|------------------|-------|----------|--------|---------|--------------------------------------------|----------|----|-----|---------|-------|---------|--------|--------|-------|
| cl_2572_chr1   | hsa-miR-4424     | 3.24  | 0.000289 | 2.58   | 24.40   | GCTTTGAAGTAACTCTGGGTTTGACTCTAGTTTGACATTT   | TAACCTCT | 11 | 67  | ENAH    | -0.92 | 0.00244 | 22.95  | 12.12  | -2.98 |
| cl_25774_chr17 | hsa-miR-641      | -0.72 | 0.009573 | 7.16   | 4.36    | GAGCCCTCTAGCCACCCGACTGTCTTTAATGCCTATAAAA   | TGCTCTT  | 22 | 11  | PLXDC1  | 1.03  | 0.00012 | 7.64   | 15.58  | -0.75 |
| cl_25782_chr17 | hsa-miR-3622a-5p | 3.06  | 0.000010 | 0.23   | 1.89    | CATGTAACGTGTGTGTATGTGTACACGTGCGCGTGCTGC    | GTGCCTG  | 34 | 21  | CACNB1  | -0.39 | 0.04198 | 9.52   | 7.28   | -1.19 |
| cl_26121_chr17 | hsa-miR-421      | 1.18  | 0.004426 | 77.75  | 176.19  | ATAAAACAGCACTCCGCAAAATGCTGTGTGATCTTATTATTA | TGTTGAT  | 25 | 13  | MSI2    | -0.86 | 0.00002 | 192.37 | 106.13 | -1.01 |
| cl_26300_chr17 | hsa-miR-369-3p   | -1.14 | 0.016758 | 3.61   | 1.65    | ATACTACCTATTATTTTACCATTTTTCATAAAATCCAAGAAC | TATTATT  | 9  | 355 | ABCA9   | 1.00  | 0.02595 | 4.27   | 8.53   | -1.14 |
| cl_26300_chr17 | hsa-miR-432-5p   | -1.20 | 0.006297 | 9.90   | 4.31    | ATACTACCTATTATTTTACCATTTTTCATAAAATCCAAGAAC | TCCAAGA  | 33 | 355 | ABCA9   | 1.00  | 0.02595 | 4.27   | 8.53   | -1.19 |
| cl_26499_chr17 | hsa-miR-204-5p   | -1.38 | 0.014138 | 67.02  | 25.73   | CCACCGTGCCAGCCTCAAATAATGTATGGAAGGGAAGTTC   | AAGGGAA  | 31 | 6   | TBC1D16 | 0.98  | 0.00007 | 5.76   | 11.33  | -1.35 |
| cl_27100_chr18 | hsa-miR-1295a    | -1.77 | 0.001363 | 16.54  | 4.85    | GGTGACAGAGGTCAGGAGGAATCCATTTCCCTGGCCTAAT   | GGCCTAA  | 34 | 17  | TCF4    | 1.44  | 0.00002 | 126.93 | 343.87 | -2.54 |
| cl_27264_chr18 | hsa-miR-211-5p   | 4.32  | 0.000000 | 0.08   | 1.66    | CCTTTTTCTCTGAAGTCTCTAAGGGAAGAATATATATTTT   | AAGGGAA  | 22 | 9   | CYB5A   | -0.82 | 0.00219 | 39.78  | 22.60  | -3.53 |
| cl_27296_chr18 | hsa-miR-3136-5p  | 1.49  | 0.009911 | 0.81   | 2.26    | ACAACCGGCTCCAGTCAGTTCCTTCCCGGGGCTCTCAGA    | CAGTCAG  | 14 | 24  | ZNF516  | -1.04 | 0.00000 | 33.81  | 16.43  | -1.55 |
| cl_27296_chr18 | hsa-miR-30b-3p   | 1.06  | 0.009573 | 2.25   | 4.76    | ACAACCGGCTCCAGTCAGTTCCTTCCCGGGGCTCTCAGA    | CTCCAG   | 10 | 24  | ZNF516  | -1.04 | 0.00000 | 33.81  | 16.43  | -1.10 |
| cl_27296_chr18 | hsa-miR-30c-2-3p | 0.84  | 0.035995 | 5.28   | 9.42    | ACAACCGGCTCCAGTCAGTTCCTTCCCGGGGCTCTCAGA    | CTCCAG   | 10 | 24  | ZNF516  | -1.04 | 0.00000 | 33.81  | 16.43  | -0.88 |
| cl_27438_chr19 | hsa-miR-3648     | -1.65 | 0.002386 | 7.08   | 2.27    | CCCCAACAGGCCACCTGTGTGCGCGCCGGGCTGCATGGA    | CGCGGCT  | 28 | 39  | APC2    | 0.62  | 0.00028 | 6.56   | 10.04  | -1.01 |
| cl_27438_chr19 | hsa-miR-663b     | -1.67 | 0.001109 | 4.93   | 1.56    | CCCCAACAGGCCACCTGTGTGCGCGCCGGGCTGCATGGA    | GGCCACC  | 9  | 39  | APC2    | 0.62  | 0.00028 | 6.56   | 10.04  | -1.02 |
| cl_27561_chr19 | hsa-miR-3194-5p  | -1.19 | 0.004724 | 6.37   | 2.74    | AGAGCTCCGGGTCGTGGGATCTGAGGCTGCGCTTCCCC     | GCTGGCC  | 28 | 17  | STAP2   | 1.47  | 0.00000 | 1.93   | 5.34   | -1.75 |
| cl_27724_chr19 | hsa-miR-2467-5p  | 1.46  | 0.003890 | 3.95   | 10.85   | ACTGTTCAATGGAGCCTCAATGGCCTCACCTACTTTTCTA   | AGCCTCA  | 13 | 20  | SMARCA4 | -2.37 | 0.00000 | 603.25 | 116.79 | -3.46 |
| cl_27741_chr19 | hsa-miR-3605-3p  | 0.78  | 0.043923 | 3.22   | 5.54    | CCATGGCTACGGGGAGCTGGTAAAAACTGCCACGGAGGCAA  | ACGGAGG  | 32 | 439 | ECSIT   | -1.00 | 0.00000 | 62.21  | 31.13  | -0.78 |
| cl_27741_chr19 | hsa-miR-34a-5p   | 1.22  | 0.000260 | 144.34 | 336.94  | CCATGGCTACGGGGAGCTGGTAAAAACTGCCACGGAGGCAA  | ACTGCCA  | 26 | 439 | ECSIT   | -1.00 | 0.00000 | 62.21  | 31.13  | -1.22 |
| cl_27987_chr19 | hsa-miR-873-5p   | 2.65  | 0.000001 | 0.27   | 1.79    | GTTTATTTAATATGGCCGTTTTTACTTCTCGACAAAGGGT   | TTCTGCT  | 26 | 18  | ZNF726  | -1.22 | 0.00001 | 12.52  | 5.38   | -3.24 |
| cl_27988_chr19 | hsa-miR-708-3p   | 0.98  | 0.026809 | 18.72  | 36.79   | TATTTGTTAATGTACATAAATGTTGCCAAGTGTGTAATG    | CTAGTTG  | 30 | 13  | ZNF726  | -1.22 | 0.00001 | 12.52  | 5.38   | -1.19 |
| cl_28234_chr19 | hsa-miR-2355-5p  | 0.92  | 0.009772 | 10.03  | 18.95   | TGTTCTGTTGGGGATTCAACATGGCGCGGGAGTGCCGCGG   | TGGGGAT  | 8  | 37  | PAK4    | -0.54 | 0.00004 | 19.47  | 13.37  | -0.50 |
| cl_28628_chr19 | hsa-miR-374b-3p  | 0.94  | 0.035995 | 6.48   | 12.41   | AGTCGGAATCTGCTAAGGAGTGTGTAATAGCCCAACTGCTG  | TGCTAAG  | 11 | 63  | FCAR    | -1.22 | 0.00904 | 2.38   | 1.02   | -1.15 |
| cl_2878_chr2   | hsa-miR-361-5p   | 0.91  | 0.009573 | 96.05  | 180.08  | AGTAGAACAAATGTTTTACTCTACTGATAAAGTACAGGAA   | CTGATAA  | 25 | 6   | TMEM18  | -0.44 | 0.00450 | 32.72  | 24.19  | -0.39 |
| cl_28867_chr20 | hsa-miR-4687-5p  | -0.90 | 0.006179 | 2.46   | 1.27    | TTCAAAGCTCAAAGGATCTTTTGGTATGCCTAGGGCTGGGA  | AGGGCTG  | 32 | 18  | PLCB4   | 1.07  | 0.00004 | 3.46   | 7.28   | -0.96 |
| cl_29355_chr20 | hsa-miR-296-3p   | -1.98 | 0.000000 | 6.56   | 1.66    | TTCCATCCATAAATCTGTTGAATCCAACCTCTCCAGCA     | AACCTCT  | 28 | 18  | KCNG1   | 1.95  | 0.00005 | 0.41   | 1.58   | -3.87 |
| cl_29374_chr20 | hsa-miR-335-3p   | -2.49 | 0.000000 | 566.47 | 100.76  | ATGAAAAAAAAAAAAAGAACTTTTCTGCTAGGAAGATTATAC | TGAAAAA  | 2  | 14  | TSHZ2   | 1.88  | 0.00000 | 4.94   | 18.12  | -4.67 |
| cl_29517_chr20 | hsa-miR-4755-3p  | -1.99 | 0.000050 | 2.99   | 0.74    | CCTGGCTCTGCTCAGGTGACTGGTCTGAAAGGCGCTCTGAG  | CCTGGCT  | 1  | 5   | OSBPL2  | 0.46  | 0.00055 | 23.15  | 31.92  | -0.92 |
| cl_30430_chr22 | hsa-miR-625-5p   | -1.31 | 0.000026 | 20.75  | 8.38    | TCCCTCTCCCTCTCTCTCTCCCTCCCTCTTCTCTCT       | TCCCTCT  | 21 | 13  | SSTR3   | 1.83  | 0.00003 | 0.99   | 3.53   | -2.40 |
| cl_30489_chr22 | hsa-miR-361-3p   | 1.24  | 0.003876 | 615.76 | 1454.95 | AGTCAGGCTGGGGACTTGTGTTGAAAGAAAGAGAGTGGA    | TGGGGGA  | 9  | 19  | TAB1    | -0.32 | 0.00659 | 32.80  | 26.27  | -0.40 |
| cl_30740_chr22 | hsa-miR-4487     | -1.24 | 0.005006 | 1.62   | 0.68    | TGTGTGCCACCGTGGCTGTGTGCTGCTGTGCTGCGGC      | CAGCTCT  | 24 | 20  | SHANK3  | 0.77  | 0.00854 | 11.89  | 20.26  | -0.96 |
| cl_31173_chrX  | hsa-miR-424-5p   | -1.81 | 0.000003 | 177.32 | 50.51   | CGAGGCTGCTGGGAAAACCTGACTTCTGGCAGGGCACCCC   | GCTGCTG  | 5  | 5   | ZXDA    | 0.80  | 0.00001 | 4.00   | 6.96   | -1.45 |

|               |                 |       |          |           |          |                                           |         |    |     |        |       |         |        |        |       |
|---------------|-----------------|-------|----------|-----------|----------|-------------------------------------------|---------|----|-----|--------|-------|---------|--------|--------|-------|
| cl_3123_chr2  | hsa-miR-4687-5p | -0.90 | 0.006179 | 2.46      | 1.27     | GCCACTCTGCTCAGATGCCGTGGAGGGCTGCAACTTCTCAG | AGGGCTG | 24 | 25  | KLHL29 | 0.97  | 0.00202 | 4.77   | 9.33   | -0.87 |
| cl_31402_chrX | hsa-miR-204-5p  | -1.38 | 0.014138 | 67.02     | 25.73    | TGAAGGGAAGGACACAATCTGGCTGGCTCCACCACCTGCT  | AAGGGAA | 3  | 17  | ARMCX2 | 2.22  | 0.00000 | 4.98   | 23.20  | -3.07 |
| cl_31402_chrX | hsa-miR-4755-3p | -1.99 | 0.000050 | 2.99      | 0.74     | TGAAGGGAAGGACACAATCTGGCTGGCTCCACCACCTGCT  | CCTGGCT | 19 | 17  | ARMCX2 | 2.22  | 0.00000 | 4.98   | 23.20  | -4.41 |
| cl_31548_chrX | hsa-miR-19a-3p  | -2.41 | 0.000000 | 1852.64   | 349.18   | GCATTATCACTTCCAAATCTAACTTTGCACAAGTAACCCA  | TTGCACA | 26 | 10  | UBE2A  | 0.64  | 0.00014 | 52.47  | 81.77  | -1.54 |
| cl_31548_chrX | hsa-miR-19b-3p  | -1.82 | 0.000000 | 1655.38   | 468.75   | GCATTATCACTTCCAAATCTAACTTTGCACAAGTAACCCA  | TTGCACA | 26 | 10  | UBE2A  | 0.64  | 0.00014 | 52.47  | 81.77  | -1.16 |
| cl_31919_chrY | hsa-miR-345-5p  | 1.22  | 0.000700 | 68.98     | 161.32   | CCTATGTTCACTCAAGGCCCTAGAGTTCTACAGTCAGCAGA | AGTCAGC | 32 | 22  | TMSB4Y | -1.02 | 0.03634 | 1.59   | 0.78   | -1.25 |
| cl_31919_chrY | hsa-miR-3136-5p | 1.49  | 0.009911 | 0.81      | 2.26     | CCTATGTTCACTCAAGGCCCTAGAGTTCTACAGTCAGCAGA | CAGTCAG | 31 | 22  | TMSB4Y | -1.02 | 0.03634 | 1.59   | 0.78   | -1.52 |
| cl_328_chr1   | hsa-miR-190b    | 1.18  | 0.000093 | 1.38      | 3.12     | AAAGTCTCAGGCTTGTCTTGAATTTACATATCAATATTA   | CATATCA | 29 | 24  | PEX14  | -0.39 | 0.00157 | 22.59  | 17.23  | -0.46 |
| cl_328_chr1   | hsa-miR-548b-3p | 2.90  | 0.000000 | 0.27      | 2.10     | AAAGTCTCAGGCTTGTCTTGAATTTACATATCAATATTA   | GTTCTTG | 16 | 24  | PEX14  | -0.39 | 0.00157 | 22.59  | 17.23  | -1.13 |
| cl_336_chr1   | hsa-miR-27b-5p  | -0.99 | 0.003393 | 21.19     | 10.62    | CCCCAAGCTCTCTGAGTCTGTCCCTCCGCCATTCTCT     | AAGCTCT | 5  | 102 | CASZ1  | 0.55  | 0.02186 | 7.31   | 10.72  | -0.55 |
| cl_3881_chr2  | hsa-miR-708-5p  | 1.88  | 0.000003 | 14.78     | 54.47    | GGTCTCTTTTGTGAATCCTTAAAACTCAACTCTAGGAAG   | GCTCCTT | 2  | 16  | EIF5B  | -0.68 | 0.00006 | 199.47 | 124.38 | -1.28 |
| cl_4174_chr2  | hsa-miR-4797-3p | -2.18 | 0.000008 | 4.00      | 0.85     | CAAACATTGACACTGAGATTTGCAGTGAGAGAAAGAAAGGT | ACTGAGA | 12 | 13  | BIN1   | 1.04  | 0.00041 | 31.57  | 64.86  | -2.27 |
| cl_4174_chr2  | hsa-miR-1304-3p | -1.38 | 0.000040 | 25.27     | 9.67     | CAAACATTGACACTGAGATTTGCAGTGAGAGAAAGAAAGGT | AGTGAGA | 24 | 13  | BIN1   | 1.04  | 0.00041 | 31.57  | 64.86  | -1.44 |
| cl_4174_chr2  | hsa-miR-181b-3p | -0.88 | 0.018103 | 19.40     | 10.56    | CAAACATTGACACTGAGATTTGCAGTGAGAGAAAGAAAGGT | CAGTGAG | 23 | 13  | BIN1   | 1.04  | 0.00041 | 31.57  | 64.86  | -0.92 |
| cl_4301_chr2  | hsa-miR-449a    | -1.36 | 0.000063 | 5.99      | 2.35     | GGAGGGGAGATGGACTGCCATAAAGGAATAACGTGATCACT | ACTGCCA | 14 | 5   | MGAT5  | 0.69  | 0.00911 | 72.14  | 116.59 | -0.94 |
| cl_4330_chr2  | hsa-miR-92a-3p  | -1.64 | 0.000068 | 115704.25 | 37245.94 | CCTATCATCTGCAATATTAATGTAATTAGACAATAAATCAT | TGCAATA | 10 | 15  | SPOPL  | 0.44  | 0.01271 | 25.42  | 34.55  | -0.72 |
| cl_4454_chr2  | hsa-miR-4755-3p | -1.99 | 0.000050 | 2.99      | 0.74     | ACAGAACTTAAACCTGGCTTCCAGTCCGACGCTCTCAAC   | CCTGGCT | 13 | 6   | GP2    | 0.50  | 0.02392 | 19.89  | 28.05  | -0.99 |
| cl_4606_chr2  | hsa-miR-944     | 3.11  | 0.000048 | 7.33      | 63.31    | CAGCTTGTCTCTGATAATTTGCAAACACGGTAAGTGCTG   | ATAATTT | 15 | 24  | CDCA7  | -1.69 | 0.00000 | 223.39 | 69.27  | -5.25 |
| cl_4606_chr2  | hsa-miR-361-5p  | 0.91  | 0.009573 | 96.05     | 180.08   | CAGCTTGTCTCTGATAATTTGCAAACACGGTAAGTGCTG   | CTGATAA | 12 | 24  | CDCA7  | -1.69 | 0.00000 | 223.39 | 69.27  | -1.53 |
| cl_4774_chr2  | hsa-miR-944     | 3.11  | 0.000048 | 7.33      | 63.31    | AATTTTGTATCCATGTGCATAATTTACCTCATGATTTCTT  | ATAATTT | 20 | 18  | MARS2  | -0.69 | 0.00001 | 15.27  | 9.49   | -2.13 |
| cl_4774_chr2  | hsa-let-7a-5p   | 1.81  | 0.000004 | 5051.85   | 17753.96 | AATTTTGTATCCATGTGCATAATTTACCTCATGATTTCTT  | TACCTCA | 26 | 18  | MARS2  | -0.69 | 0.00001 | 15.27  | 9.49   | -1.24 |
| cl_4774_chr2  | hsa-let-7b-5p   | 1.71  | 0.000000 | 786.57    | 2572.37  | AATTTTGTATCCATGTGCATAATTTACCTCATGATTTCTT  | TACCTCA | 26 | 18  | MARS2  | -0.69 | 0.00001 | 15.27  | 9.49   | -1.17 |
| cl_4774_chr2  | hsa-let-7e-5p   | 1.57  | 0.000051 | 350.23    | 1042.74  | AATTTTGTATCCATGTGCATAATTTACCTCATGATTTCTT  | TACCTCA | 26 | 18  | MARS2  | -0.69 | 0.00001 | 15.27  | 9.49   | -1.08 |
| cl_4774_chr2  | hsa-let-7f-5p   | 1.13  | 0.000287 | 8944.06   | 19581.46 | AATTTTGTATCCATGTGCATAATTTACCTCATGATTTCTT  | TACCTCA | 26 | 18  | MARS2  | -0.69 | 0.00001 | 15.27  | 9.49   | -0.78 |
| cl_4774_chr2  | hsa-let-7g-5p   | 1.85  | 0.000001 | 5123.47   | 18520.87 | AATTTTGTATCCATGTGCATAATTTACCTCATGATTTCTT  | TACCTCA | 26 | 18  | MARS2  | -0.69 | 0.00001 | 15.27  | 9.49   | -1.27 |
| cl_4774_chr2  | hsa-let-7i-5p   | 1.16  | 0.000505 | 4537.30   | 10130.51 | AATTTTGTATCCATGTGCATAATTTACCTCATGATTTCTT  | TACCTCA | 26 | 18  | MARS2  | -0.69 | 0.00001 | 15.27  | 9.49   | -0.80 |
| cl_5545_chr3  | hsa-miR-335-5p  | -1.09 | 0.000328 | 118.94    | 55.71    | TGACTGCTAAAGGATACTCTTGAGAGTACTCTTAAGTACTC | CTCTTGA | 17 | 14  | EOMES  | 1.42  | 0.00043 | 8.75   | 23.44  | -1.55 |
| cl_5563_chr3  | hsa-miR-4487    | -1.24 | 0.005006 | 1.62      | 0.68     | AAAAGGTCACAGCTCTAGTCTGACGATCTTCTACAGCTA   | CAGCTCT | 10 | 16  | TGFBR2 | 0.87  | 0.00013 | 71.25  | 130.06 | -1.08 |
| cl_568_chr1   | hsa-miR-20a-3p  | -2.86 | 0.000000 | 28.86     | 3.93     | GTTTGGGGAGTCGGGAGGATGACAGTCTTTTGACAGCATG  | ATGCAGT | 20 | 339 | RUNX3  | 0.43  | 0.02380 | 59.56  | 80.13  | -1.23 |
| cl_568_chr1   | hsa-miR-93-3p   | -2.56 | 0.000000 | 153.44    | 25.99    | GTTTGGGGAGTCGGGAGGATGACAGTCTTTTGACAGCATG  | CAGCAGT | 34 | 339 | RUNX3  | 0.43  | 0.02380 | 59.56  | 80.13  | -1.10 |
| cl_5974_chr3  | hsa-miR-34a-3p  | 0.99  | 0.002408 | 1.08      | 2.19     | ATAAATCCAGCGTCCCGACTAATGCCTGATTGCATATTA   | CTGATTG | 27 | 21  | CADPS  | -4.03 | 0.00000 | 74.14  | 4.55   | -4.00 |

|              |                 |       |          |         |        |                                           |          |    |      |         |       |         |        |        |       |
|--------------|-----------------|-------|----------|---------|--------|-------------------------------------------|----------|----|------|---------|-------|---------|--------|--------|-------|
| cl_601_chr1  | hsa-miR-145-5p  | -1.46 | 0.002408 | 414.75  | 150.53 | CTTTGTCTGAATGTGCTATTGCTACATGACTGGACTAGGC  | ACTGGAC  | 30 | 18   | PIGV    | 0.47  | 0.00257 | 7.90   | 10.94  | -0.69 |
| cl_6214_chr3 | hsa-miR-9-3p    | 2.32  | 0.000225 | 2.29    | 11.53  | TTTTATCTATAATAGCTTTATCAACTCTTTTTCCGATGCTC | GCTTTAT  | 15 | 13   | TOMM70A | -0.34 | 0.04086 | 80.97  | 64.16  | -0.78 |
| cl_6383_chr3 | hsa-miR-641     | -0.72 | 0.009573 | 7.16    | 4.36   | TCTTGTCTTTGGTTTCAGAGTGGGGTATGTAAGCGAGGTAT | TGCTTTT  | 4  | 24   | ILDR1   | 1.82  | 0.00000 | 2.27   | 8.00   | -1.32 |
| cl_648_chr1  | hsa-miR-378a-3p | -1.54 | 0.000000 | 2405.55 | 827.87 | TAGAGTCCAGTGAAGAATGATGCGGTAGCCTTGACCACATC | GTCCAGT  | 5  | 5    | PTPRU   | 1.00  | 0.00078 | 2.27   | 4.55   | -1.54 |
| cl_648_chr1  | hsa-miR-378c    | -1.27 | 0.000000 | 300.43  | 124.57 | TAGAGTCCAGTGAAGAATGATGCGGTAGCCTTGACCACATC | GTCCAGT  | 5  | 5    | PTPRU   | 1.00  | 0.00078 | 2.27   | 4.55   | -1.28 |
| cl_648_chr1  | hsa-miR-378d    | -1.10 | 0.003182 | 14.73   | 6.83   | TAGAGTCCAGTGAAGAATGATGCGGTAGCCTTGACCACATC | GTCCAGT  | 5  | 5    | PTPRU   | 1.00  | 0.00078 | 2.27   | 4.55   | -1.10 |
| cl_648_chr1  | hsa-miR-378i    | -2.12 | 0.000031 | 7.69    | 1.78   | TAGAGTCCAGTGAAGAATGATGCGGTAGCCTTGACCACATC | GTCCAGT  | 5  | 5    | PTPRU   | 1.00  | 0.00078 | 2.27   | 4.55   | -2.13 |
| cl_6528_chr3 | hsa-miR-135b-5p | 1.51  | 0.007710 | 1.71    | 4.91   | GATCGATACAGCCATAACTCTTCTCTCGTCTGTGGTTCCT  | AGCCATA  | 10 | 16   | COL6A6  | -2.17 | 0.00000 | 6.96   | 1.55   | -3.27 |
| cl_6528_chr3 | hsa-miR-4424    | 3.24  | 0.000289 | 2.58    | 24.40  | GATCGATACAGCCATAACTCTTCTCTCGTCTGTGGTTCCT  | TAECTCT  | 15 | 16   | COL6A6  | -2.17 | 0.00000 | 6.96   | 1.55   | -7.01 |
| cl_6580_chr3 | hsa-miR-708-5p  | 1.88  | 0.000003 | 14.78   | 54.47  | CTGCCTGTCTGGGATCTGTGTCTGGATCAGCTCCTTTTA   | GCTCCTT  | 32 | 48   | PPP2R3A | -0.39 | 0.03582 | 6.43   | 4.90   | -0.74 |
| cl_6601_chr3 | hsa-miR-1304-3p | -1.38 | 0.000040 | 25.27   | 9.67   | GGTCTCTGTTCTACATCAGCTGATCTGCTCCAGTGAGACT  | AGTGAGA  | 33 | 8    | MRAS    | 0.66  | 0.01123 | 6.48   | 10.25  | -0.92 |
| cl_6601_chr3 | hsa-miR-181b-3p | -0.88 | 0.018103 | 19.40   | 10.56  | GGTCTCTGTTCTACATCAGCTGATCTGCTCCAGTGAGACT  | CAGTGAG  | 32 | 8    | MRAS    | 0.66  | 0.01123 | 6.48   | 10.25  | -0.58 |
| cl_6952_chr3 | hsa-miR-641     | -0.72 | 0.009573 | 7.16    | 4.36   | TTGAAGTGTGTGATGCTTTACAAATGTCTTTTTAGTGT    | TGCTTTT  | 27 | 18   | TTC14   | 0.94  | 0.00000 | 71.79  | 137.32 | -0.68 |
| cl_7186_chr3 | hsa-miR-2467-5p | 1.46  | 0.003890 | 3.95    | 10.85  | TTAATGGCACCCACGGGCTGGGTGGAGCCTCAGCACCCAC  | AGCCTCA  | 28 | 5    | DLG1    | -0.38 | 0.00692 | 94.72  | 72.84  | -0.55 |
| cl_7449_chr4 | hsa-miR-101-5p  | 1.15  | 0.002105 | 4.96    | 11.04  | ATAACTGGGCTTAAAGGGCATTGAAAAGGATGAATTCTGGT | ATAACTG  | 1  | 20   | GPR125  | -1.08 | 0.00444 | 8.24   | 3.89   | -1.25 |
| cl_7963_chr4 | hsa-miR-204-5p  | -1.38 | 0.014138 | 67.02   | 25.73  | GACCCAAGGGAACCTGTACTGCCACCCCTTAGAGATACTA  | AAGGGAA  | 6  | 23   | FAM13A  | 0.62  | 0.01100 | 9.41   | 14.43  | -0.85 |
| cl_7967_chr4 | hsa-miR-641     | -0.72 | 0.009573 | 7.16    | 4.36   | GAGTTCTACAGCCCATGATTAGGTCTGTCTTTTAGTGAGC  | TGCTTTT  | 27 | 10   | FAM13A  | 0.62  | 0.01100 | 9.41   | 14.43  | -0.45 |
| cl_8073_chr4 | hsa-miR-1295a   | -1.77 | 0.001363 | 16.54   | 4.85   | GTGAGACAATGCTAGGGCCATAAAGATGGTGAACATATGCC | GGCCTAA  | 17 | 1519 | DKK2    | 0.66  | 0.00754 | 1.00   | 1.58   | -1.17 |
| cl_8148_chr4 | hsa-miR-4767    | 1.69  | 0.000000 | 1.09    | 3.49   | GCCCCGCGACTCTCGACAATGGACAGTGTACAGTGGTGGC  | GCCCCGCG | 1  | 19   | UGT8    | -1.45 | 0.00000 | 15.21  | 5.56   | -2.45 |
| cl_8417_chr4 | hsa-miR-378a-3p | -1.54 | 0.000000 | 2405.55 | 827.87 | TCCCCCATGCCACCCACCTGACCCCTCTGTCCAGTCCA    | GTCCAGT  | 32 | 11   | TRIM2   | 0.84  | 0.00027 | 6.23   | 11.13  | -1.29 |
| cl_8417_chr4 | hsa-miR-378c    | -1.27 | 0.000000 | 300.43  | 124.57 | TCCCCCATGCCACCCACCTGACCCCTCTGTCCAGTCCA    | GTCCAGT  | 32 | 11   | TRIM2   | 0.84  | 0.00027 | 6.23   | 11.13  | -1.06 |
| cl_8417_chr4 | hsa-miR-378d    | -1.10 | 0.003182 | 14.73   | 6.83   | TCCCCCATGCCACCCACCTGACCCCTCTGTCCAGTCCA    | GTCCAGT  | 32 | 11   | TRIM2   | 0.84  | 0.00027 | 6.23   | 11.13  | -0.92 |
| cl_8417_chr4 | hsa-miR-378i    | -2.12 | 0.000031 | 7.69    | 1.78   | TCCCCCATGCCACCCACCTGACCCCTCTGTCCAGTCCA    | GTCCAGT  | 32 | 11   | TRIM2   | 0.84  | 0.00027 | 6.23   | 11.13  | -1.78 |
| cl_8476_chr4 | hsa-miR-641     | -0.72 | 0.009573 | 7.16    | 4.36   | GAAACGTGTGCCCTATCGATTCTTTGTCTTTGGATTCTGA  | TGCTTTT  | 25 | 15   | RAPGEF2 | 0.54  | 0.01964 | 19.98  | 29.01  | -0.39 |
| cl_8478_chr4 | hsa-miR-4517    | -1.60 | 0.000287 | 5.06    | 1.68   | TTTTGTTCATTGTTAAGTATTCATATTTTTGTACTCGGCTG | CATATTT  | 22 | 5    | RAPGEF2 | 0.54  | 0.01964 | 19.98  | 29.01  | -0.86 |
| cl_8478_chr4 | hsa-miR-3613-3p | -0.59 | 0.049047 | 4.41    | 2.92   | TTTTGTTCATTGTTAAGTATTCATATTTTTGTACTCGGCTG | TTTTTGT  | 26 | 5    | RAPGEF2 | 0.54  | 0.01964 | 19.98  | 29.01  | -0.32 |
| cl_8601_chr4 | hsa-miR-211-5p  | 4.32  | 0.000000 | 0.08    | 1.66   | CGAAGGGGAAGGACTAGTCTAGCATACTCTCTTTCCCTC   | AAGGGAA  | 3  | 16   | SPCS3   | -0.38 | 0.00566 | 120.61 | 92.93  | -1.63 |
| cl_9065_chr5 | hsa-miR-132-3p  | -0.85 | 0.002610 | 123.76  | 68.55  | TACAATTTTCATTATAACGTGAAAAAGTTAACTGTTAGGT  | ACTGTTA  | 32 | 14   | LIFR    | 2.68  | 0.00000 | 6.19   | 39.77  | -2.28 |
| cl_9231_chr5 | hsa-miR-3157-3p | 0.92  | 0.008752 | 0.73    | 1.44   | GGTCTAATATGTTATAAAAAATGTATGTAAGGGCAGAAA   | AGGGCAG  | 32 | 5    | NLN     | -0.69 | 0.00747 | 36.39  | 22.54  | -0.64 |
| cl_9251_chr5 | hsa-miR-3667-3p | -1.36 | 0.008075 | 1.56    | 0.64   | GTTACAAGCTCCAGGAAGGTTCTGAGATAGCTGGTTCTGG  | GGAAGGT  | 15 | 26   | CD180   | 0.69  | 0.03903 | 50.22  | 81.05  | -0.94 |
| cl_9251_chr5 | hsa-miR-589-3p  | -1.73 | 0.000002 | 17.95   | 5.34   | GTTACAAGCTCCAGGAAGGTTCTGAGATAGCTGGTTCTGG  | GTTCTGA  | 20 | 26   | CD180   | 0.69  | 0.03903 | 50.22  | 81.05  | -1.19 |

|                |                  |       |          |         |         |                                           |         |    |     |          |       |         |        |        |       |
|----------------|------------------|-------|----------|---------|---------|-------------------------------------------|---------|----|-----|----------|-------|---------|--------|--------|-------|
| cl_9476_chr5   | hsa-miR-200c-3p  | 3.71  | 0.000013 | 13.86   | 181.49  | ACCGCTCGGAATAGTTTAAATGTAGTATTAACATGAAGAG  | AGTATTA | 24 | 5   | ANKRD32  | -0.60 | 0.00000 | 33.05  | 21.73  | -2.25 |
| cl_9476_chr5   | hsa-miR-615-3p   | 2.51  | 0.000000 | 2.50    | 14.25   | ACCGCTCGGAATAGTTTAAATGTAGTATTAACATGAAGAG  | GCTCGGA | 4  | 5   | ANKRD32  | -0.60 | 0.00000 | 33.05  | 21.73  | -1.52 |
| cl_9645_chr5   | hsa-miR-4677-3p  | 2.36  | 0.000008 | 6.84    | 35.21   | GGCAACCTCAACCAATTTGTTGCCATGTTACAGAAAACCT  | TCACAGA | 29 | 14  | CCDC112  | -0.89 | 0.00000 | 17.86  | 9.64   | -2.10 |
| cl_10531_chr6  | hsa-miR-4755-3p  | -1.99 | 0.000050 | 2.99    | 0.74    | TGTCTCTGAACGCACAGCCTGGCAGAGTGGAACGAAGCCA  | GCCTGGC | 18 | 5   | RREB1    | 0.58  | 0.00256 | 19.49  | 29.03  | -1.14 |
| cl_10546_chr6  | hsa-miR-485-5p   | -1.88 | 0.001384 | 12.78   | 3.45    | CCAGCCTCGTGTCTGACCTTTGGGGCAATGTTACTTTGGC  | CAGCCTC | 2  | 35  | SLC35B3  | 0.36  | 0.00855 | 26.59  | 34.13  | -0.68 |
| cl_10881_chr6  | hsa-miR-4767     | 1.69  | 0.000000 | 1.09    | 3.49    | CTCCGCGAGCGGCTCCGGGGTGACGCCGCCGGAGAGCTGG  | CGCCCGC | 24 | 8   | ITPR3    | -0.46 | 0.00832 | 180.31 | 131.23 | -0.77 |
| cl_11017_chr6  | hsa-miR-4662a-5p | 1.64  | 0.000301 | 0.82    | 2.46    | GCCTCTGGCAGTACTGGATTGGCTAGGGAGACTAGGAGGG  | TTGGCTA | 20 | 9   | MRPS10   | -0.38 | 0.01960 | 22.58  | 17.36  | -0.62 |
| cl_11334_chr6  | hsa-miR-299-3p   | -1.46 | 0.003877 | 4.09    | 1.48    | TGCCACATCGTTCTACAGATCGACAATGCCCGTCTTGCTG  | CCCACAT | 3  | 64  | NT5E     | 0.92  | 0.00981 | 4.87   | 9.18   | -1.34 |
| cl_11367_chr6  | hsa-let-7b-3p    | 1.17  | 0.001317 | 16.34   | 36.79   | TATTTGTATACTTCTAGGGGTCTGGTGGTTCTAGCGACTGA | TTGTATA | 4  | 41  | PM20D2   | -1.10 | 0.00000 | 57.20  | 26.62  | -1.29 |
| cl_11448_chr6  | hsa-miR-30c-2-3p | 0.84  | 0.035995 | 5.28    | 9.42    | CTCTCTCCACCCCTCCCTCACAGATCCTTCCCTCCCG     | TCTCCA  | 4  | 26  | CCNC     | -0.37 | 0.02256 | 87.35  | 67.57  | -0.31 |
| cl_11508_chr6  | hsa-miR-374c-5p  | 3.26  | 0.001459 | 0.66    | 6.22    | CCCAGGTGTTAAGTTATCTGCCTGGGGTCATATAACTCC   | TGTATTA | 7  | 14  | ARMC2    | -1.00 | 0.00000 | 54.26  | 27.17  | -3.25 |
| cl_12122_chr7  | hsa-miR-181b-3p  | -0.88 | 0.018103 | 19.40   | 10.56   | GCTGTGGAGGGGTTGGAAGTGGCTGGGAGAGTCAGTGACG  | TCAGTGA | 33 | 25  | PDGFA    | 1.26  | 0.00026 | 2.97   | 7.09   | -1.11 |
| cl_12492_chr7  | hsa-miR-365a-5p  | -0.99 | 0.047890 | 4.19    | 2.08    | TCTCTGTTAAGTCCAGAAATTTAGCAGAGATGTTTTTTT   | AAGTCCC | 10 | 30  | WIPF3    | 0.83  | 0.01049 | 0.96   | 1.72   | -0.83 |
| cl_13489_chr7  | hsa-miR-411-5p   | -1.33 | 0.024549 | 47.59   | 18.90   | GGACAGTTGGTGCAGTCTACTGGAGAGGACCACACCTTCC  | GTCTACT | 15 | 21  | TMEM178B | 1.29  | 0.00008 | 2.65   | 6.48   | -1.71 |
| cl_13581_chr7  | hsa-miR-29a-3p   | 0.97  | 0.019370 | 4902.45 | 9611.91 | CACAACCGTGTGGTCTCACTGGTGTGTGAGTGACAGTGA   | TGGTGCT | 21 | 21  | ZNF777   | -0.35 | 0.01738 | 15.23  | 11.94  | -0.34 |
| cl_13581_chr7  | hsa-miR-29b-3p   | 1.97  | 0.000004 | 156.65  | 614.17  | CACAACCGTGTGGTCTCACTGGTGTGTGAGTGACAGTGA   | TGGTGCT | 21 | 21  | ZNF777   | -0.35 | 0.01738 | 15.23  | 11.94  | -0.69 |
| cl_13581_chr7  | hsa-miR-29c-3p   | 1.51  | 0.002622 | 1205.13 | 3424.74 | CACAACCGTGTGGTCTCACTGGTGTGTGAGTGACAGTGA   | TGGTGCT | 21 | 21  | ZNF777   | -0.35 | 0.01738 | 15.23  | 11.94  | -0.53 |
| cl_13745_chr7  | hsa-miR-127-5p   | -1.65 | 0.000512 | 10.82   | 3.43    | AGCGGTAATGAGCTTACATAGACTTTTAAATGTCAGAA    | AGCTTCA | 12 | 31  | PTPRN2   | 0.93  | 0.00066 | 8.05   | 15.36  | -1.54 |
| cl_13801_chr8  | hsa-miR-641      | -0.72 | 0.009573 | 7.16    | 4.36    | ATGTCTTAAAGTCTCAACCTGGGAACTGATACATCCCTC   | ATGTCTT | 1  | 8   | ARHGEF10 | 1.05  | 0.00023 | 6.25   | 13.00  | -0.76 |
| cl_13910_chr8  | hsa-miR-4677-3p  | 2.36  | 0.000008 | 6.84    | 35.21   | TGTTCCACTGTCCGACGATTTGGGAATGAGACTCACAGTTC | CTCACAG | 32 | 148 | FAM167A  | -3.14 | 0.00000 | 88.76  | 10.07  | -7.42 |
| cl_144_chr1    | hsa-miR-296-5p   | -1.00 | 0.001384 | 13.99   | 7.04    | GCCCTAGTAAGTCCAACGGTACCACCAGGAGTGGGGCCCC  | GGGGCCC | 34 | 17  | CCR6     | 1.54  | 0.00369 | 6.12   | 17.76  | -1.53 |
| cl_1462_chr1   | hsa-miR-625-3p   | -0.95 | 0.012667 | 40.61   | 21.02   | AGCAATGTTGTCATGGTCTCTATAGTGATTGATGAAG     | CTATAGT | 22 | 23  | NTNG1    | 1.17  | 0.02029 | 2.38   | 5.34   | -1.11 |
| cl_14669_chr8  | hsa-miR-151a-3p  | 0.87  | 0.011732 | 2221.72 | 4062.80 | CTTTTATTGGATAAAAGTTATTGAGCTAATAACAATTTT   | CAGTCTA | 24 | 9   | MMP16    | -0.86 | 0.00792 | 2.21   | 1.22   | -0.74 |
| cl_14854_chr8  | hsa-miR-181b-3p  | -0.88 | 0.018103 | 19.40   | 10.56   | GTGAAGTGACTGGCTTCAAGTGAAGTGTGGCAGTGGTGT   | TCAGTGA | 17 | 6   | ZFPM2    | 0.94  | 0.00126 | 2.86   | 5.50   | -0.83 |
| cl_14854_chr8  | hsa-miR-4420     | -2.03 | 0.000161 | 9.58    | 2.34    | GTGAAGTGACTGGCTTCAAGTGAAGTGTGGCAGTGGTGT   | TCAGTGA | 17 | 6   | ZFPM2    | 0.94  | 0.00126 | 2.86   | 5.50   | -1.91 |
| cl_15932_chr9  | hsa-miR-548s     | 1.29  | 0.011693 | 0.70    | 1.77    | TGGGCAGTCCCGAAAGCTATTGGCCAAGCGCTCTTCAGG   | TTGGCCA | 21 | 32  | GALNT12  | -0.54 | 0.02726 | 9.95   | 6.87   | -0.69 |
| cl_16040_chr9  | hsa-miR-3940-3p  | -0.81 | 0.023652 | 4.97    | 2.86    | GGGCCGGCTCGGCTGGCGGTGGGGCGGGCCGGCCGGGAC   | CCGGGCT | 4  | 7   | LPAR1    | 2.25  | 0.00000 | 4.11   | 19.50  | -1.82 |
| cl_16040_chr9  | hsa-miR-3194-5p  | -1.19 | 0.004724 | 6.37    | 2.74    | GGGCCGGCTCGGCTGGCGGTGGGGCGGGCCGGCCGGGAC   | GGCTGGC | 12 | 7   | LPAR1    | 2.25  | 0.00000 | 4.11   | 19.50  | -2.68 |
| cl_16303_chr9  | hsa-miR-130b-5p  | -2.01 | 0.000006 | 211.10  | 52.39   | AGCCACACATGGCTTCTGTGTTGAAAGAGCGCCATAGAA   | GAAAGAG | 24 | 11  | FNBP1    | 1.91  | 0.00000 | 77.52  | 291.85 | -3.84 |
| cl_16342_chr9  | hsa-miR-296-5p   | -1.00 | 0.001384 | 13.99   | 7.04    | GAGGCCCGGGCCAGGAGTGAAGCCTTGTCTGACTT       | GGGGCCC | 8  | 16  | NTNG2    | 1.18  | 0.00012 | 3.25   | 7.38   | -1.18 |
| cl_17100_chr10 | hsa-miR-132-3p   | -0.85 | 0.002610 | 123.76  | 68.55   | AAAGACATTTTAGGGACTGTTGGGGGCATTTGAAATGTCT  | GACTGTT | 15 | 5   | ANK3     | 1.00  | 0.00316 | 7.32   | 14.68  | -0.85 |

|                |                  |       |          |          |           |                                            |          |    |      |          |       |         |        |        |       |
|----------------|------------------|-------|----------|----------|-----------|--------------------------------------------|----------|----|------|----------|-------|---------|--------|--------|-------|
| cl_17705_chr10 | hsa-miR-146a-5p  | 3.62  | 0.000000 | 9075.99  | 111335.84 | AGTTCTCCAGGTCCAACGATTACCCCTTCTGTTCCGGTCTCG | AGTTCTC  | 1  | 8    | TRUB1    | -0.29 | 0.02493 | 23.71  | 19.40  | -1.05 |
| cl_17705_chr10 | hsa-miR-146b-5p  | 1.74  | 0.002333 | 17080.92 | 57155.72  | AGTTCTCCAGGTCCAACGATTACCCCTTCTGTTCCGGTCTCG | AGTTCTC  | 1  | 8    | TRUB1    | -0.29 | 0.02493 | 23.71  | 19.40  | -0.50 |
| cl_18109_chr11 | hsa-miR-149-5p   | -1.00 | 0.003123 | 13.82    | 6.89      | CGCAGCCCCGGCGGACCCACTGTTGGACCTGAGGAGCCAGC  | GAGCCAG  | 34 | 16   | MIR4687  | 0.90  | 0.00003 | 0.52   | 0.98   | -0.90 |
| cl_18501_chr11 | hsa-miR-5695     | -1.35 | 0.003064 | 1.44     | 0.54      | AAAAAAAAAAGTTGGGGGCTTGAGAGTAAAGACTTGAGAG   | CTTGAGAG | 34 | 18   | CD82     | 1.77  | 0.00000 | 58.84  | 201.31 | -2.39 |
| cl_18870_chr11 | hsa-miR-27b-5p   | -0.99 | 0.003393 | 21.19    | 10.62     | CCGCATAAGCTCAAAGGCTTGTGGTATTAGACCTGAGG     | TAAGCTC  | 6  | 20   | CCND1    | 1.30  | 0.00000 | 8.24   | 20.32  | -1.29 |
| cl_19020_chr11 | hsa-miR-424-5p   | -1.81 | 0.000003 | 177.32   | 50.51     | ACTGAGGCCTCCCAATTCGATGTTGGATCATGCTGCTCTCA  | TGCTGCT  | 31 | 31   | PAK1     | 0.69  | 0.00574 | 38.08  | 61.41  | -1.25 |
| cl_19274_chr11 | hsa-miR-4518     | -1.83 | 0.000964 | 8.95     | 2.49      | ATCCCAGGGCTGAAAGGTGTGCTCCCTGAGAGGTGCCCAT   | CCCTGAG  | 24 | 27   | NPAT     | 0.32  | 0.03492 | 39.17  | 48.90  | -0.59 |
| cl_19314_chr11 | hsa-miR-140-3p   | 0.74  | 0.009811 | 2206.05  | 3679.70   | GAAGGGGAGGGCGGGAATGCTCCGCGAGGGGCTGTGGTGAC  | CTGTGGT  | 32 | 57   | PPP2R1B  | -0.49 | 0.00153 | 59.54  | 42.38  | -0.36 |
| cl_19546_chr11 | hsa-miR-3922-3p  | 1.24  | 0.017898 | 0.75     | 1.82      | CGCCCCGGGGCGCGCAGGACTGACGTATCGCAAGGCCAGCC  | AGGCCAG  | 33 | 19   | FOXRED1  | -0.62 | 0.00040 | 49.43  | 32.06  | -0.78 |
| cl_19660_chr12 | hsa-miR-3648     | -1.65 | 0.002386 | 7.08     | 2.27      | GCCCCGCCCGCGGCCTCTCCGCCCGCGCCCGCCGATT      | CCGCGGC  | 10 | 7    | NINJ2    | 1.25  | 0.00000 | 8.11   | 19.29  | -2.06 |
| cl_19905_chr12 | hsa-miR-590-5p   | -0.84 | 0.028628 | 6.20     | 3.43      | TGCTTTTCCAAGTTCGGGGTGCATAAGCTTATCGCTTAT    | ATAAGCT  | 25 | 12   | ST8SIA1  | 1.48  | 0.00000 | 11.61  | 32.45  | -1.24 |
| cl_20286_chr12 | hsa-miR-432-5p   | -1.20 | 0.006297 | 9.90     | 4.31      | TAAACGTGGCTCCAAGGTCTGGGAGGTGGATCAGACGA     | CTCCAAG  | 10 | 17   | OS9      | 0.50  | 0.00014 | 180.32 | 255.15 | -0.60 |
| cl_20392_chr12 | hsa-miR-361-3p   | 1.24  | 0.003876 | 615.76   | 1454.95   | CGTGGCAACCGGCTCCGGGATGGCTGGCTGGGGGCTAGT    | CTGGGGG  | 28 | 9403 | MDM2     | -1.40 | 0.00000 | 216.24 | 82.20  | -1.73 |
| cl_20396_chr12 | hsa-miR-4645-3p  | 0.66  | 0.038686 | 3.63     | 5.68      | TGACCAATCGTACTGTCAATTGATGCCACTAGTTGTTAAT   | TACTGTC  | 11 | 107  | CCT2     | -1.17 | 0.00000 | 389.18 | 172.41 | -0.77 |
| cl_20902_chr12 | hsa-miR-659-5p   | 1.29  | 0.000787 | 2.67     | 6.44      | CATGGAATCAGAACCTACGTTGTAACAAGTCCCCAGGTGA   | AAGGTCC  | 27 | 22   | CIT      | -1.22 | 0.00000 | 45.23  | 19.42  | -1.57 |
| cl_21077_chr12 | hsa-miR-484      | -1.26 | 0.000040 | 1404.88  | 587.88    | GGGCAAGGGAGCCTGGGGCTGTAGTTCACATGGCCAGCC    | GAGCCTG  | 9  | 5    | TMEM132C | 0.98  | 0.00321 | 1.31   | 2.58   | -1.24 |
| cl_21249_chr13 | hsa-miR-132-3p   | -0.85 | 0.002610 | 123.76   | 68.55     | TTTGAGACTGTTTACAGTCTGACGGCATGAACATCAACGC   | GACTGTT  | 6  | 30   | ATP8A2   | 0.66  | 0.00865 | 2.60   | 4.12   | -0.56 |
| cl_21256_chr13 | hsa-miR-361-3p   | 1.24  | 0.003876 | 615.76   | 1454.95   | CGAGGGACGAGGGCTGGGGTGGGGAGCGGTGTCTCTGCC    | CTGGGGG  | 14 | 49   | CDK8     | -0.53 | 0.00034 | 17.74  | 12.31  | -0.65 |
| cl_21616_chr13 | hsa-miR-3136-5p  | 1.49  | 0.009911 | 0.81     | 2.26      | TTCTTCAATCAAATTCAGTCAATAGCCCAAGACTGATAG    | TCAGTCA  | 17 | 34   | DACH1    | -0.85 | 0.00000 | 15.77  | 8.78   | -1.26 |
| cl_21642_chr13 | hsa-miR-140-3p   | 0.74  | 0.009811 | 2206.05  | 3679.70   | AATCAAGTTCTAGAGTCCAATGATCTTAATCACTGTGGTGT  | CTGTGGT  | 33 | 8    | UCHL3    | -0.93 | 0.00000 | 41.29  | 21.64  | -0.69 |
| cl_22757_chr14 | hsa-miR-181a-5p  | 1.32  | 0.014841 | 7336.45  | 18322.20  | AAAATCTGATTTAATGAGCTTGAGTTGAATGTAATCAGA    | TGAATGT  | 28 | 10   | CLMN     | -0.56 | 0.02125 | 14.83  | 10.03  | -0.74 |
| cl_22757_chr14 | hsa-miR-181c-5p  | 2.83  | 0.000011 | 218.96   | 1560.77   | AAAATCTGATTTAATGAGCTTGAGTTGAATGTAATCAGA    | TGAATGT  | 28 | 10   | CLMN     | -0.56 | 0.02125 | 14.83  | 10.03  | -1.60 |
| cl_22933_chr14 | hsa-miR-3648     | -1.65 | 0.002386 | 7.08     | 2.27      | GTAGGTGGCTGCCGCGGATGTGGGCGGCTTGCCTGTGGC    | CCGCGGC  | 12 | 10   | GPR132   | 1.48  | 0.00000 | 4.56   | 12.75  | -2.45 |
| cl_23041_chr15 | hsa-miR-2467-5p  | 1.46  | 0.003890 | 3.95     | 10.85     | GGCGGGCCAGCGCCGCGGAGTTTCGGGTCGAGGAGCCTCG   | GAGCCTC  | 34 | 8    | TJP1     | -1.07 | 0.00000 | 136.54 | 64.81  | -1.57 |
| cl_23199_chr15 | hsa-miR-146a-5p  | 3.62  | 0.000000 | 9075.99  | 111335.84 | CTCAGTTCTCCAGTACGACGTTTCTGCTTTGAGCAGGAGC   | AGTTCTC  | 4  | 6    | STARD9   | -0.49 | 0.00438 | 20.47  | 14.60  | -1.76 |
| cl_23199_chr15 | hsa-miR-146b-5p  | 1.74  | 0.002333 | 17080.92 | 57155.72  | CTCAGTTCTCCAGTACGACGTTTCTGCTTTGAGCAGGAGC   | AGTTCTC  | 4  | 6    | STARD9   | -0.49 | 0.00438 | 20.47  | 14.60  | -0.85 |
| cl_24095_chr16 | hsa-miR-2110     | 1.05  | 0.000723 | 2.94     | 6.19      | CTGGGCTTCTTCTGGGCATCCCCAGGCTATCTCCAGA      | TTCCCA   | 21 | 23   | DNASE1   | -0.94 | 0.00000 | 185.11 | 96.73  | -0.99 |
| cl_24243_chr16 | hsa-miR-485-5p   | -1.88 | 0.001384 | 12.78    | 3.45      | GCCCTGCAGCCTCGTCAAGGCTAGTCCCTCCCGATAAAC    | CAGCCTC  | 7  | 48   | KIAA0430 | 0.61  | 0.00073 | 95.43  | 145.46 | -1.14 |
| cl_24793_chr16 | hsa-miR-4662a-5p | 1.64  | 0.000301 | 0.82     | 2.46      | CTTGGCTATACGGATGCTCATGGCGACCTGCTGCCCTCAC   | TTGGCTA  | 2  | 23   | ACD      | -0.41 | 0.00525 | 40.14  | 30.17  | -0.68 |
| cl_24965_chr16 | hsa-miR-199a-5p  | 1.59  | 0.000007 | 181.97   | 548.37    | GACCCCTAGCTACTGTTGGTACACAGTTGGTACCCAA      | ACACTGG  | 13 | 8    | MPHOSPH6 | -0.79 | 0.00000 | 43.58  | 25.18  | -1.26 |
| cl_25287_chr17 | hsa-miR-150-3p   | 3.38  | 0.000000 | 3.49     | 36.47     | GCGGGCATGAGGAGTGTGTACCAATTCAGCTGTTTCT      | TGTACCA  | 21 | 339  | DHX33    | -1.13 | 0.00000 | 43.83  | 20.04  | -3.82 |

|                |                 |       |          |         |         |                                           |         |    |     |          |       |         |        |        |       |
|----------------|-----------------|-------|----------|---------|---------|-------------------------------------------|---------|----|-----|----------|-------|---------|--------|--------|-------|
| cl_25426_chr17 | hsa-miR-374c-5p | 3.26  | 0.001459 | 0.66    | 6.22    | TTGTATTAGAATAGAGCATGTGCTGGATTATGACTGGATGC | TGTATTA | 2  | 16  | ELAC2    | -0.53 | 0.00004 | 142.93 | 98.66  | -1.74 |
| cl_25662_chr17 | hsa-miR-3065-3p | -1.21 | 0.004663 | 1.20    | 0.49    | AGGAGGTGCTGTGTGAAGTCTGTGCCAGCAGCCGAGGCTC  | GGTGCTG | 5  | 20  | CDK5R1   | 3.58  | 0.00000 | 2.41   | 28.75  | -4.34 |
| cl_2572_chr1   | hsa-miR-708-3p  | 0.98  | 0.026809 | 18.72   | 36.79   | GCTTTGAAGTTAACTCTGGGTTTACTCTAGTTTGACATTT  | TCTAGTT | 27 | 67  | ENAH     | -0.92 | 0.00244 | 22.95  | 12.12  | -0.90 |
| cl_25906_chr17 | hsa-miR-221-5p  | 1.18  | 0.015984 | 188.23  | 426.85  | GTCCCTGCTTTAGAGGTCATTGCCAGGGTTGTTGAGGCAAC | TGCCAGG | 21 | 52  | SLC25A39 | -0.73 | 0.00001 | 178.71 | 107.89 | -0.86 |
| cl_2634_chr1   | hsa-miR-4523    | -1.05 | 0.028608 | 2.00    | 0.93    | TATATAAAAAAATTCTCGGTTGATGCACCATACAAAATA   | TCTCGGT | 15 | 23  | RHOU     | 0.71  | 0.01537 | 7.16   | 11.71  | -0.75 |
| cl_26407_chr17 | hsa-miR-18a-3p  | -2.46 | 0.000000 | 88.89   | 16.14   | AGGGACAGAGGGCAGCAGCTGGACCGAGGCGCGTTC      | AGGGCAG | 9  | 5   | LLGL2    | 1.33  | 0.00000 | 8.23   | 20.71  | -3.27 |
| cl_26499_chr17 | hsa-miR-485-5p  | -1.88 | 0.001384 | 12.78   | 3.45    | CCACCGTGCCAGCCTCAAATAATGTATGGAAGGGAAGTTC  | CAGCCTC | 11 | 6   | TBC1D16  | 0.98  | 0.00007 | 5.76   | 11.33  | -1.83 |
| cl_265_chr1    | hsa-miR-485-5p  | -1.88 | 0.001384 | 12.78   | 3.45    | CCGCGCCAGCCTCTGGCCTCGCGGAGGACGCCACCGT     | CAGCCTC | 7  | 5   | GPR153   | 0.73  | 0.02360 | 3.68   | 6.11   | -1.37 |
| cl_27718_chr19 | hsa-miR-615-3p  | 2.51  | 0.000000 | 2.50    | 14.25   | CTGTGGAGCTTGACTCTGGCTCGGTGAAGAGACATGGGTGA | GGCTCGG | 18 | 9   | ILF3     | -1.17 | 0.00000 | 878.29 | 389.71 | -2.94 |
| cl_28628_chr19 | hsa-miR-10b-3p  | 3.02  | 0.000000 | 1.45    | 11.98   | AGTCGGAATCTGCTAAGGAGTGTGTAATAGCCAACTGCTG  | GAATCTG | 6  | 63  | FCAR     | -1.22 | 0.00904 | 2.38   | 1.02   | -3.70 |
| cl_2878_chr2   | hsa-miR-222-5p  | 2.42  | 0.000036 | 0.56    | 3.04    | AGTAGAACAAATGTTTTACTCTACTGATAAAAGTACAGGAA | CTACTGA | 22 | 6   | TMEM18   | -0.44 | 0.00450 | 32.72  | 24.19  | -1.06 |
| cl_2879_chr2   | hsa-miR-21-3p   | 2.80  | 0.000301 | 738.25  | 5152.52 | GGAGGGAAAGACCAAGGGTTTCTGTTGGTGTGTTGGCAAC  | TGGTGT  | 27 | 23  | TMEM18   | -0.44 | 0.00450 | 32.72  | 24.19  | -1.22 |
| cl_288_chr1    | hsa-miR-342-5p  | 0.77  | 0.020518 | 31.43   | 53.35   | CGTGGCACCCCTCGCGGCTCTCCCTGCTCCTGCTGGGT    | GCACCC  | 5  | 11  | CAMTA1   | -1.00 | 0.00000 | 52.64  | 26.39  | -0.76 |
| cl_29908_chr21 | hsa-miR-106b-3p | -1.41 | 0.000000 | 1010.79 | 381.55  | GAAACACTCGCGCACCCCTCAGTGCGCCCGGGGGGGGG    | CAGTGC  | 22 | 54  | BACE2    | 1.88  | 0.00000 | 11.14  | 40.86  | -2.64 |
| cl_30740_chr22 | hsa-miR-654-5p  | -1.68 | 0.000699 | 4.43    | 1.38    | TGTGTGCCACCGTGGCTGTTGTGCTGCTTGTGCTGCGGC   | GCCACC  | 6  | 20  | SHANK3   | 0.77  | 0.00854 | 11.89  | 20.26  | -1.29 |
| cl_30740_chr22 | hsa-miR-335-5p  | -1.09 | 0.000328 | 118.94  | 55.71   | TGTGTGCCACCGTGGCTGTTGTGCTGCTTGTGCTGCGGC   | GCTCTG  | 26 | 20  | SHANK3   | 0.77  | 0.00854 | 11.89  | 20.26  | -0.84 |
| cl_31074_chrX  | hsa-miR-3065-3p | -1.21 | 0.004663 | 1.20    | 0.49    | AGCACCAGAGTGGTGTCTGGGTAAGTGTGTTAGTGC      | GGTGCTG | 12 | 14  | PHF16    | 1.43  | 0.00065 | 9.55   | 25.80  | -1.74 |
| cl_31217_chrX  | hsa-miR-378a-3p | -1.54 | 0.000000 | 2405.55 | 827.87  | TGAGTCCAGGAGATCAAGGCTGTAGTGCCGTGACTGTGCCA | AGTCCAG | 3  | 5   | YIPF6    | 0.58  | 0.00019 | 15.68  | 23.36  | -0.89 |
| cl_31217_chrX  | hsa-miR-378c    | -1.27 | 0.000000 | 300.43  | 124.57  | TGAGTCCAGGAGATCAAGGCTGTAGTGCCGTGACTGTGCCA | AGTCCAG | 3  | 5   | YIPF6    | 0.58  | 0.00019 | 15.68  | 23.36  | -0.73 |
| cl_31217_chrX  | hsa-miR-378d    | -1.10 | 0.003182 | 14.73   | 6.83    | TGAGTCCAGGAGATCAAGGCTGTAGTGCCGTGACTGTGCCA | AGTCCAG | 3  | 5   | YIPF6    | 0.58  | 0.00019 | 15.68  | 23.36  | -0.63 |
| cl_31217_chrX  | hsa-miR-378i    | -2.12 | 0.000031 | 7.69    | 1.78    | TGAGTCCAGGAGATCAAGGCTGTAGTGCCGTGACTGTGCCA | AGTCCAG | 3  | 5   | YIPF6    | 0.58  | 0.00019 | 15.68  | 23.36  | -1.22 |
| cl_31402_chrX  | hsa-miR-3194-5p | -1.19 | 0.004724 | 6.37    | 2.74    | TGAAGGGAAGGACACAATCCTGGCTGGCTCCACCCTGCT   | GGCTGGC | 22 | 17  | ARMCX2   | 2.22  | 0.00000 | 4.98   | 23.20  | -2.65 |
| cl_31919_chrY  | hsa-miR-628-5p  | 1.10  | 0.000433 | 4.00    | 8.61    | CCTATGTTCACTCAAGGCCCTAGAGTTCTACAGTCAGCAGA | GTCAGCA | 33 | 22  | TMSB4Y   | -1.02 | 0.03634 | 1.59   | 0.78   | -1.12 |
| cl_3262_chr2   | hsa-miR-455-3p  | 1.26  | 0.000225 | 16.17   | 38.86   | GTGGACTGAGACAACATGTGAGACGGACTGTATGTGAGA   | TGGACTG | 2  | 26  | LTBP1    | -1.48 | 0.00000 | 106.35 | 38.19  | -1.87 |
| cl_3669_chr2   | hsa-miR-5683    | 3.73  | 0.000404 | 2.16    | 28.60   | CAAAAGGAGCTGAAGGCAGTGGCCCTGAGAGCCATCTGTGA | CATCTGT | 33 | 13  | SMYD5    | -0.54 | 0.00004 | 42.34  | 29.16  | -2.01 |
| cl_4440_chr2   | hsa-miR-3667-3p | -1.36 | 0.008075 | 1.56    | 0.64    | AAAGTCAAAGAGGAAGGAATACCACTGGCAAAAATCATT   | AGGAAGG | 12 | 539 | GALNT1   | 0.44  | 0.00945 | 59.79  | 81.18  | -0.60 |
| cl_4499_chr2   | hsa-miR-21-3p   | 2.80  | 0.000301 | 738.25  | 5152.52 | GTATGGTGGTGTATATGCGTGGCATAGTTTAACTGTTCAA  | TGGTGT  | 7  | 6   | SLC4A10  | -0.45 | 0.00031 | 32.77  | 23.95  | -1.27 |
| cl_4698_chr2   | hsa-miR-873-3p  | 1.68  | 0.006278 | 0.67    | 2.18    | ATGCTCGCCGCTCTCCCCTCAGTCTCTGCTCCTGTTTC    | CAGTCTC | 22 | 356 | ZNF804A  | -0.94 | 0.03219 | 27.14  | 14.19  | -1.57 |
| cl_5584_chr3   | hsa-miR-376a-3p | -2.14 | 0.000001 | 3.89    | 0.86    | TTTAGGTTCCAGAAATAGTCCACCCAAAGTCTATGAATG   | TCTATGA | 32 | 69  | GLB1     | 1.00  | 0.00000 | 45.40  | 90.64  | -2.14 |
| cl_5680_chr3   | hsa-miR-376a-3p | -2.14 | 0.000001 | 3.89    | 0.86    | AGAACAAGAGTTTCTATGACTGAAGTAATGAAAGTTGAACA | TCTATGA | 13 | 30  | KRBOX1   | 0.72  | 0.00059 | 3.05   | 5.04   | -1.55 |
| cl_5704_chr3   | hsa-miR-615-3p  | 2.51  | 0.000000 | 2.50    | 14.25   | ATCTTCTGGGCTTCTGGGTTGGTGGCTCGGTGGTACCTG   | GGCTCGG | 25 | 22  | CLEC3B   | -0.32 | 0.04973 | 26.07  | 20.91  | -0.80 |

|              |                   |       |          |         |          |                                            |         |    |     |         |       |         |       |       |       |
|--------------|-------------------|-------|----------|---------|----------|--------------------------------------------|---------|----|-----|---------|-------|---------|-------|-------|-------|
| cl_5818_chr3 | hsa-miR-145-5p    | -1.46 | 0.002408 | 414.75  | 150.53   | TGCCAGGGTGGGAAGTGGAGTGTGGATTAGGTCCCTGCCCT  | AACTGGA | 13 | 61  | CISH    | 2.52  | 0.00000 | 1.64  | 9.41  | -3.68 |
| cl_5974_chr3 | hsa-miR-92b-5p    | 0.98  | 0.008992 | 0.54    | 1.12     | ATAAATCCAGCCGTCGCCACTAATGCCTGATTGCATATTTA  | CCGTCCC | 11 | 21  | CADPS   | -4.03 | 0.00000 | 74.14 | 4.55  | -3.93 |
| cl_601_chr1  | hsa-miR-3942-5p   | -0.98 | 0.015065 | 2.95    | 1.47     | CTTTGTCTGAATGTGCTATTGCTACATGACTGGACTAGGC   | TATTGCT | 18 | 18  | PIGV    | 0.47  | 0.00257 | 7.90  | 10.94 | -0.46 |
| cl_6528_chr3 | hsa-miR-4999-5p   | 1.47  | 0.000026 | 0.45    | 1.31     | GATCGATACAGCCATAACTCTTCTCTCGTCTGTGGTTCCT   | ATACAGC | 6  | 16  | COL6A6  | -2.17 | 0.00000 | 6.96  | 1.55  | -3.17 |
| cl_6528_chr3 | hsa-miR-140-3p    | 0.74  | 0.009811 | 2206.05 | 3679.70  | GATCGATACAGCCATAACTCTTCTCTCGTCTGTGGTTCCT   | CTGTGGT | 30 | 16  | COL6A6  | -2.17 | 0.00000 | 6.96  | 1.55  | -1.60 |
| cl_7562_chr4 | hsa-miR-23a-3p    | 0.83  | 0.001283 | 640.05  | 1134.81  | GCAATATCAGTAACCAGATTTTCACGCAATGTGACTGCTGGC | AATGTGA | 28 | 11  | RELL1   | -0.90 | 0.00020 | 11.62 | 6.25  | -0.74 |
| cl_7562_chr4 | hsa-miR-199a-5p   | 1.59  | 0.000007 | 181.97  | 548.37   | GCAATATCAGTAACCAGATTTTCACGCAATGTGACTGCTGGC | ACACTGG | 34 | 11  | RELL1   | -0.90 | 0.00020 | 11.62 | 6.25  | -1.42 |
| cl_7891_chr4 | hsa-miR-4662a-5p  | 1.64  | 0.000301 | 0.82    | 2.46     | TCACCTTTCTCTCTCCATGAGTCGAGTTGTTGGCTAA      | TTGGCTA | 34 | 59  | C4orf22 | -0.81 | 0.00073 | 4.35  | 2.48  | -1.33 |
| cl_7963_chr4 | hsa-miR-654-5p    | -1.68 | 0.000699 | 4.43    | 1.38     | GACCCAAGGGAACCCCTGACTGCCACCCCTTAGAGATACTA  | GCCCACC | 22 | 23  | FAM13A  | 0.62  | 0.01100 | 9.41  | 14.43 | -1.03 |
| cl_8103_chr4 | hsa-miR-31-5p     | 1.70  | 0.001088 | 12.84   | 41.26    | CTCTCGGAAGAAACCGATCTTGCCACACCTTGATCTCAGA   | TCTTGCC | 18 | 26  | ELOVL6  | -1.93 | 0.00000 | 17.11 | 4.49  | -3.27 |
| cl_828_chr1  | hsa-miR-27a-3p    | 0.86  | 0.011903 | 616.77  | 1122.55  | CGGTTTCATTGCAATCCTGCATAAACCCACTGTGATATTGTA | ACTGTGA | 27 | 19  | ZNF684  | -0.44 | 0.00347 | 5.87  | 4.31  | -0.38 |
| cl_8324_chr4 | hsa-miR-204-5p    | -1.38 | 0.014138 | 67.02   | 25.73    | CAGGCCAGAACACATGCCTCTGTGCTGAAAAGGGAGGAAAA  | AAAGGGA | 29 | 362 | INPP4B  | 2.00  | 0.00000 | 7.16  | 28.60 | -2.76 |
| cl_8417_chr4 | hsa-miR-654-5p    | -1.68 | 0.000699 | 4.43    | 1.38     | TCCCCCATGCCACCCACTGACCCCTCTTGCCAGTCCA      | GCCCACC | 10 | 11  | TRIM2   | 0.84  | 0.00027 | 6.23  | 11.13 | -1.40 |
| cl_883_chr1  | hsa-miR-3065-3p   | -1.21 | 0.004663 | 1.20    | 0.49     | GGTGTGGGCTCAAACCTCTGTGGAGCAGCCCCACCCCA     | GGTGCTG | 1  | 74  | CCDC24  | 1.02  | 0.00303 | 4.96  | 10.08 | -1.24 |
| cl_889_chr1  | hsa-miR-155-5p    | 3.25  | 0.000000 | 1152.30 | 10989.11 | ATTAGCAAAGCATTAGCTGTTGCTTTAGAGAACTCGGGAAG  | AGCATT  | 9  | 18  | ERI3    | -0.75 | 0.00000 | 53.09 | 31.50 | -2.45 |
| cl_9147_chr5 | hsa-miR-4999-5p   | 1.47  | 0.000026 | 0.45    | 1.31     | TTATAAAGAGCTGATACAGCTCAAGAGTGAAAAACAATA    | ATACAGC | 14 | 56  | NDUFS4  | -0.38 | 0.01006 | 37.97 | 29.17 | -0.56 |
| cl_9753_chr5 | hsa-miR-103a-2-5p | -1.50 | 0.000002 | 5.75    | 2.00     | GTGCATCCACACTGCATTCTGTAGAAGAACCCCACTGT     | AAGAAGC | 26 | 25  | CHSY3   | 0.84  | 0.01365 | 1.37  | 2.45  | -1.26 |
| cl_9753_chr5 | hsa-miR-3691-5p   | -1.17 | 0.000276 | 7.92    | 3.54     | GTGCATCCACACTGCATTCTGTAGAAGAACCCCACTGT     | CATCCAC | 4  | 25  | CHSY3   | 0.84  | 0.01365 | 1.37  | 2.45  | -0.98 |

1. Consortium EP. An integrated encyclopedia of DNA elements in the human genome. *Nature*. 2012;489(7414):57-74.
2. Trapnell C, Pachter L, Salzberg SL. TopHat: discovering splice junctions with RNA-Seq. *Bioinformatics*. 2009;25(9):1105-11.
3. Robinson MD, McCarthy DJ, Smyth GK. edgeR: a Bioconductor package for differential expression analysis of digital gene expression data. *Bioinformatics*. 2010;26(1):139-40.
4. Li H, Durbin R. Fast and accurate short read alignment with Burrows-Wheeler transform. *Bioinformatics*. 2009;25(14):1754-60.
5. Li H, Handsaker B, Wysoker A, et al. The Sequence Alignment/Map format and SAMtools. *Bioinformatics*. 2009;25(16):2078-9.
6. Jones DT, Jager N, Kool M, et al. Dissecting the genomic complexity underlying medulloblastoma. *Nature*. 2012;488(7409):100-5.
7. Wang K, Li M, Hakonarson H. ANNOVAR: functional annotation of genetic variants from high-throughput sequencing data. *Nucleic Acids Res*. 2010;38(16):e164.



8. Quinlan AR, Hall IM. BEDTools: a flexible suite of utilities for comparing genomic features. *Bioinformatics*. 2010;26(6):841-2.
9. Richter J, Schlesner M, Hoffmann S, et al. Recurrent mutation of the ID3 gene in Burkitt lymphoma identified by integrated genome, exome and transcriptome sequencing. *Nat Genet*. 2012;44(12):1316-20.
10. Hoffmann S, Otto C, Kurtz S, et al. Fast mapping of short sequences with mismatches, insertions and deletions using index structures. *PLoS Comput Biol*. 2009;5(9):e1000502.
11. Breese MR, Liu Y. NGSUtils: a software suite for analyzing and manipulating next-generation sequencing datasets. *Bioinformatics*. 2013;29(4):494-6.
12. Hackenberg M, Sturm M, Langenberger D, Falcon-Perez JM, Aransay AM. miRanalyzer: a microRNA detection and analysis tool for next-generation sequencing experiments. *Nucleic Acids Res*. 2009;37(Web Server issue):W68-76.
13. Enright AJ, John B, Gaul U, et al. MicroRNA targets in *Drosophila*. *Genome biology*. 2004;5(1):R1-R.
14. Betel D, Koppal A, Agius P, Sander C, Leslie C. Comprehensive modeling of microRNA targets predicts functional non-conserved and non-canonical sites. *Genome Biol*. 2010;11(8):R90.
15. Martin M. Cutadapt removes adapter sequences from high-throughput sequencing reads. *EMBnet J*. 2011;17(1):10-2.
16. Anders S, Pyl PT, Huber W. HTSeq—A Python framework to work with high-throughput sequencing data. *bioRxiv*. 2014.
17. Flicek P, Amode MR, Barrell D, et al. Ensembl 2014. *Nucleic Acids Res*. 2013:gkt1196.
18. Kloetgen A, Münch PC, Borkhardt A, Hoell JI, McHardy AC. Biochemical and bioinformatic methods for elucidating the role of RNA–protein interactions in posttranscriptional regulation. *Briefings in functional genomics*. 2014:elu020.
19. Hafner M, Landthaler M, Burger L, et al. Transcriptome-wide identification of RNA-binding protein and microRNA target sites by PAR-CLIP. *Cell*. 2010;141(1):129-41.
20. Farazi TA, Ten Hoeve JJ, Brown M, et al. Identification of distinct miRNA target regulation between breast cancer molecular subtypes using AGO2-PAR-CLIP and patient datasets. *Genome Biol*. 2014;15(1):R9.
21. Lenze D, Leoncini L, Hummel M, et al. The different epidemiologic subtypes of Burkitt lymphoma share a homogenous micro RNA profile distinct from diffuse large B-cell lymphoma. *Leukemia*. 2011;25(12):1869-76.
