# Supplementary material
Source: PubMed Central journal article supplement (PMC5394868)
Supplement: 711170c6e8a8627a74138190504b05fd_HAEMATOL-2016-143891v4-Hezaveh-01.pdf [file 711170c6e8a8627a74138190504b05fd_HAEMATOL-2016-143891v4-Hezaveh-01.pdf]

# mRNA deregulation through microRNAs as a highly relevant mechanism in lymphomagenesis

16

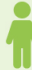

Burkitt lymphomas

19

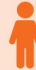

Diffuse large B-cell lymphomas

21

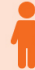

Follicular lymphomas

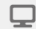

miRnome sequencing of patients

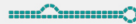

- 22 miRNAs separate Burkitt from diffuse large B-cell lymphomas/follicular lymphomas
  - 13 regulated by MYC
  - 3 unreported microRNAs

- recurrent mutations of hsa-miR-142
- editing of the hsa-miR-376 cluster

There is evidence for microRNA editing in lymphomagenesis

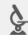

Argonaute-2 photoactivatable ribonucleoside-enhanced cross-linking and immunoprecipitation experiments to analyze the direct physical interactions of microRNAs with mRNAs

- 208 mRNAs directly targeted by MicroRNAs
- 328 mRNAs directly targeted by MicroRNAs

There are several regulatory pathways of relevance in lymphomagenesis including Ras, PI3K-Akt and MAPK signaling pathways, also recurrently deregulated in lymphomas by mutations
